# Supplementary material for: A conserved quality-control pathway that mediates degradation of unassembled ribosomal proteins
Source: eLife. 2016 Aug 23;5:e19105. doi: 10.7554/eLife.19105 (PMC5026473; doi:10.7554/eLife.19105)
Supplement: Figure 7—source data 1. — DOI: http://dx.doi.org/10.7554/eLife.19105.018 [file elife-19105-fig7-data1.xlsx]

## Sheet: Sheet1
	Blot	Set#	Intensity	FLAG/GAPDH	Ratio			Ave.	Stdev
--	Rpl26-FLAG	Set 1	0.01	0.00171233	0.117237			0.0703902	0.0406835
Rpl26-FLAG+DMSO	Rpl26-FLAG	Set 1	0.15	0.0146056	1			1	0
Rpl26-FLAG+MG132	Rpl26-FLAG	Set 1	1.46	0.147177	10.0767			10.0678	0.39845
Rpl26-FLAG+Btz	Rpl26-FLAG	Set 1	1.32	0.129921	8.89528			8.65553	0.322567
--	Rpl26-FLAG	Set 2	0.01	0.00110497	0.0439419
Rpl26-FLAG+DMSO	Rpl26-FLAG	Set 2	0.43	0.0251462	1
Rpl26-FLAG+MG132	Rpl26-FLAG	Set 2	3.49	0.243036	9.66493
Rpl26-FLAG+Btz	Rpl26-FLAG	Set 2	3.39	0.220847	8.78252
--	Rpl26-FLAG	Set 3	0.02	0.00128866	0.0499911
Rpl26-FLAG+DMSO	Rpl26-FLAG	Set 3	0.87	0.0257778	1
Rpl26-FLAG+MG132	Rpl26-FLAG	Set 3	7.64	0.269679	10.4617
Rpl26-FLAG+Btz	Rpl26-FLAG	Set 3	6.41	0.213667	8.28879
--	GAPDH	Set 1	5.84
Rpl26-FLAG+DMSO	GAPDH	Set 1	10.27
Rpl26-FLAG+MG132	GAPDH	Set 1	9.92
Rpl26-FLAG+Btz	GAPDH	Set 1	10.16
--	GAPDH	Set 2	9.05
Rpl26-FLAG+DMSO	GAPDH	Set 2	17.1
Rpl26-FLAG+MG132	GAPDH	Set 2	14.36
Rpl26-FLAG+Btz	GAPDH	Set 2	15.35
--	GAPDH	Set 3	15.52
Rpl26-FLAG+DMSO	GAPDH	Set 3	33.75
Rpl26-FLAG+MG132	GAPDH	Set 3	28.33
Rpl26-FLAG+Btz	GAPDH	Set 3	30
