# Supplementary material for: A conserved quality-control pathway that mediates degradation of unassembled ribosomal proteins
Source: eLife. 2016 Aug 23;5:e19105. doi: 10.7554/eLife.19105 (PMC5026473; doi:10.7554/eLife.19105)
Supplement: Figure 7—source data 2. — DOI: http://dx.doi.org/10.7554/eLife.19105.019 [file elife-19105-fig7-data2.xlsx]

## Sheet: Sheet1
Cell type		Blot	Intensity		FLAG/GAPDH	Ratio
293T	con-dox	Rpl26-FLAG	0.61		0.0270991	1
293T	con+dox	Rpl26-FLAG	0.59		0.0260716	0.962084
293T	HUWE1 KD-dox	Rpl26-FLAG	0.55		0.0243578	0.898844
293T	HUWE1 KD+dox	Rpl26-FLAG	2.1		0.0937919	3.46107
293T	con-dox	GAPDH	22.51
293T	con+dox	GAPDH	22.63
293T	HUWE1 KD-dox	GAPDH	22.58
293T	HUWE1 KD+dox	GAPDH	22.39
Hela	HUWE1 KD-dox	Rpl26-FLAG	0.33		0.0107039	0.953357
Hela	HUWE1 KD+dox	Rpl26-FLAG	0.98		0.0344706	3.07018
Hela	con-dox	Rpl26-FLAG	0.3		0.0112275	1
Hela	con+dox	Rpl26-FLAG	0.31		0.0108696	0.968116
Hela	HUWE1 KD-dox	GAPDH	30.83
Hela	HUWE1 KD+dox	GAPDH	28.43
Hela	con-dox	GAPDH	26.72
Hela	con+dox	GAPDH	28.52
