# Supplementary material for: A conserved quality-control pathway that mediates degradation of unassembled ribosomal proteins
Source: eLife. 2016 Aug 23;5:e19105. doi: 10.7554/eLife.19105 (PMC5026473; doi:10.7554/eLife.19105)
Supplement: Figure 7—source data 3. — DOI: http://dx.doi.org/10.7554/eLife.19105.020 [file elife-19105-fig7-data3.xlsx]

## Sheet: Sheet1
	Blot	Set #	Intensity	FLAG/GAPDH	Ratio		Ave	Stdev
Control	GAPDH	Set 1	33.63				1	0
HUWE1 KO	GAPDH	Set 1	33.1	-			14.3313	2.14663
Control	GAPDH	Set 2	19.74	-
HUWE1 KO	GAPDH	Set 2	19.39	-
Control	GAPDH	Set 3	19.35	-
HUWE1 KO	GAPDH	Set 3	21.84	-
Control	Rpl26-FLAG	Set 1	0.2	0.00594707	1
HUWE1 KO	Rpl26-FLAG	Set 1	3.01	0.0909366	15.291
Control	Rpl26-FLAG	Set 2	0.2	0.0101317	1
HUWE1 KO	Rpl26-FLAG	Set 2	3.11	0.160392	15.8307
Control	Rpl26-FLAG	Set 3	0.2	0.0103359	1
HUWE1 KO	Rpl26-FLAG	Set 3	2.68	0.122711	11.8723
