# Supplementary material for: A conserved quality-control pathway that mediates degradation of unassembled ribosomal proteins
Source: eLife. 2016 Aug 23;5:e19105. doi: 10.7554/eLife.19105 (PMC5026473; doi:10.7554/eLife.19105)
Supplement: Figure 7—source data 4. — DOI: http://dx.doi.org/10.7554/eLife.19105.021 [file elife-19105-fig7-data4.xlsx]

## Sheet: Sheet1
	Blot	CHK treatment (min)	Intensity	FLAG/GAPDH	Ratio
Control	GAPDH	0	19.17
Control	GAPDH	15	15.2
Control	GAPDH	30	17.06
Control	GAPDH	45	16.43
Control	GAPDH	60	15.8
HUWE1 KO	GAPDH	0	8.38
HUWE1 KO	GAPDH	15	9.28
HUWE1 KO	GAPDH	30	8.57
HUWE1 KO	GAPDH	45	8.94
HUWE1 KO	GAPDH	60	10.17
Control	Rpl26-FLAG	0	0.55	0.0286907	1
Control	Rpl26-FLAG	15	0.34	0.0223684	0.779641
Control	Rpl26-FLAG	30	0.3	0.017585	0.612917
Control	Rpl26-FLAG	45	0.26	0.0158247	0.551563
Control	Rpl26-FLAG	60	0.2	0.0126582	0.441197
HUWE1 KO	Rpl26-FLAG	0	1.75	0.208831	1
HUWE1 KO	Rpl26-FLAG	15	2.15	0.231681	1.10942
HUWE1 KO	Rpl26-FLAG	30	2.18	0.254376	1.2181
HUWE1 KO	Rpl26-FLAG	45	2.09	0.233781	1.11948
HUWE1 KO	Rpl26-FLAG	60	2.07	0.20354	0.974665
