# Supplementary material for: A conserved quality-control pathway that mediates degradation of unassembled ribosomal proteins
Source: eLife. 2016 Aug 23;5:e19105. doi: 10.7554/eLife.19105 (PMC5026473; doi:10.7554/eLife.19105)
Supplement: Supplementary file 3. — (A) Tom1 interactors identified by MS. (B) Dataset from SILAC-GlyGly analysis. (C) Insoluble proteins identified in tom1 mutants. DOI: http://dx.doi.org/10.7554/eLife.19105.024 [file elife-19105-supp3.xlsx]

## Sheet: Supplementary file 3A
Fasta headers	NT Geo-mean	HA Geo-mean	Fold difference NT:HA (most probably Tom1 interactions)
>YDR457W TOM1 SGDID:S000002865, Chr IV from 1369783-1379589, Verified ORF, E3 ubiquitin ligase of the hect-domain class; has a role in mRNA export from the nucleus and may regulate transcriptional coactivators	480.43	14.1172	34.0315
>YJR056C YJR056C SGDID:S000003817, Chr X from 542495-541785, reverse complement, Uncharacterized ORF, Hypothetical protein	480.43	64.919	7.40045
>YMR255W GFD1 SGDID:S000004868, Chr XIII from 778000-778566, Verified ORF, Coiled-coiled protein of unknown function, identified as a high-copy suppressor of a dbp5 mutation	480.43	81.4001	5.90208
>YHL015W RPS20 SGDID:S000001007, Chr VIII from 75409-75774, Verified ORF, Protein component of the small (40S) ribosomal subunit; overproduction suppresses mutations affecting RNA polymerase III-dependent transcription; has similarity to E. coli S10 and r	480.43	119.048	4.0356
>YOR167C RPS28A SGDID:S000005693, Chr XV from 649008-648805, reverse complement, Verified ORF, Protein component of the small (40S) ribosomal subunit; nearly identical to Rps28Bp and has similarity to rat S28 ribosomal protein;>YLR264W RPS28B SGDID:S0000	213.085	57.8692	3.68218
>YLR335W NUP2 SGDID:S000004327, Chr XII from 797430-799592, Verified ORF, Nucleoporin involved in nucleocytoplasmic transport, binds to either the nucleoplasmic or cytoplasmic faces of the nuclear pore complex depending on Ran-GTP levels; also has a role	480.43	185.896	2.5844
>YGL189C RPS26A SGDID:S000003157, Chr VII from 148594-148235, reverse complement, Verified ORF, Protein component of the small (40S) ribosomal subunit; nearly identical to Rps26Bp and has similarity to rat S26 ribosomal protein;>YER131W RPS26B SGDID:S000	480.43	188.178	2.55306
>YMR146C TIF34 SGDID:S000004754, Chr XIII from 558523-557480, reverse complement, Verified ORF, Subunit of the core complex of translation initiation factor 3(eIF3), which is essential for translation	200.235	78.7154	2.54378
>YGR034W RPL26B SGDID:S000003266, Chr VII from 555816-555834,556312-556676, Verified ORF, Protein component of the large (60S) ribosomal subunit, nearly identical to Rpl26Ap and has similarity to E. coli L24 and rat L26 ribosomal proteins; binds to 5.8S r	199.304	84.9185	2.347
>YML093W UTP14 SGDID:S000004558, Chr XIII from 83090-85789, Verified ORF, Nucleolar protein, component of the small subunit (SSU) processome containing the U3 snoRNA that is involved in processing of pre-18S rRNA	480.43	208.174	2.30783
>YNL189W SRP1 SGDID:S000005133, Chr XIV from 284261-285889, Verified ORF, Karyopherin alpha homolog, forms a dimer with karyopherin beta Kap95p to mediate import of nuclear proteins, binds the nuclear localization signal of the substrate during import; ma	480.43	210.394	2.28348
>YOR272W YTM1 SGDID:S000005798, Chr XV from 832812-834194, Verified ORF, Constituent of 66S pre-ribosomal particles, required for maturation of the large ribosomal subunit	480.43	217.402	2.20987
>YOL041C NOP12 SGDID:S000005401, Chr XV from 252645-251266, reverse complement, Verified ORF, Nucleolar protein, required for pre-25S rRNA processing; contains an RNA recognition motif (RRM) and has similarity to Nop13p, Nsr1p, and putative orthologs in D	480.43	218.778	2.19597
>YGR209C TRX2 SGDID:S000003441, Chr VII from 913232-912918, reverse complement, Verified ORF, Cytoplasmic thioredoxin isoenzyme of the thioredoxin system which protects cells against oxidative and reductive stress, forms LMA1 complex with Pbi2p, acts as a	480.43	221.251	2.17143
>YGL031C RPL24A SGDID:S000002999, Chr VII from 437939-437472, reverse complement, Verified ORF, Ribosomal protein L30 of the large (60S) ribosomal subunit, nearly identical to Rpl24Bp and has similarity to rat L24 ribosomal protein; not essential for tran	276.401	133.385	2.0722
>YDR037W KRS1 SGDID:S000002444, Chr IV from 525438-527213, Verified ORF, Lysyl-tRNA synthetase; also identified as a negative regulator of general control of amino acid biosynthesis	480.43	235.355	2.0413
>YOR205C YOR205C SGDID:S000005731, Chr XV from 727235-725565, reverse complement, Uncharacterized ORF, Protein of unknown function; non-tagged protein is detected in purified mitochondria in high-throughput studies; null mutant displays decreased frequenc	480.43	235.56	2.03953
>YNL138W SRV2 SGDID:S000005082, Chr XIV from 366743-368323, Verified ORF, CAP (cyclase-associated protein) subunit of adenylyl cyclase complex; N-terminus binds adenylyl cyclase and facilitates activation by RAS; C-terminus binds ADP-actin monomers, facil	480.43	238.204	2.01689
>YNL064C YDJ1 SGDID:S000005008, Chr XIV from 507098-505869, reverse complement, Verified ORF, Protein chaperone involved in regulation of the HSP90 and HSP70 functions; involved in protein translocation across membranes; member of the DnaJ family	480.43	241.29	1.99109
>YLR347C KAP95 SGDID:S000004339, Chr XII from 826412-823827, reverse complement, Verified ORF, Karyopherin beta, forms a dimeric complex with Srp1p (Kap60p) that mediates nuclear import of cargo proteins via a nuclear localization signal (NLS), interacts	480.43	241.979	1.98542
>YGR037C ACB1 SGDID:S000003269, Chr VII from 559998-559735, reverse complement, Verified ORF, Acyl-CoA-binding protein, transports newly synthesized acyl-CoA esters from fatty acid synthetase (Fas1p-Fas2p) to acyl-CoA-consuming processes	480.43	245.192	1.95941
>YOR117W RPT5 SGDID:S000005643, Chr XV from 545030-546334, Verified ORF, One of six ATPases of the 19S regulatory particle of the 26S proteasome involved in the degradation of ubiquitinated substrates; recruited to the GAL1-10 promoter region upon inducti	333.74	171.595	1.94493
>YMR229C RRP5 SGDID:S000004842, Chr XIII from 731122-725933, reverse complement, Verified ORF, RNA binding protein with preference for single stranded tracts of Us involved in synthesis of both 18S and 5.8S rRNAs; component of both the ribosomal small su	282.072	145.454	1.93925
>YKR095W MLP1 SGDID:S000001803, Chr XI from 619447-625074, Verified ORF, Myosin-like protein associated with the nuclear envelope, connects the nuclear pore complex with the nuclear interior; involved with Tel1p in telomere length control; involved with P	406.782	210.025	1.93682
>YPR108W RPN7 SGDID:S000006312, Chr XVI from 742452-743741, Verified ORF, Essential, non-ATPase regulatory subunit of the 26S proteasome, similar to another S. cerevisiae regulatory subunit, Rpn5p, as well as to mammalian proteasome subunits	480.43	249.424	1.92616
>YLR167W RPS31 SGDID:S000004157, Chr XII from 498949-499407, Verified ORF, Fusion protein that is cleaved to yield a ribosomal protein of the small (40S) subunit and ubiquitin; ubiquitin may facilitate assembly of the ribosomal protein into ribosomes; int	101.751	54.0555	1.88235
>YBR196C PGI1 SGDID:S000000400, Chr II from 613895-612231, reverse complement, Verified ORF, Glycolytic enzyme phosphoglucose isomerase, catalyzes the interconversion of glucose-6-phosphate and fructose-6-phosphate; required for cell cycle progression and	337.975	179.796	1.87977
>YGR148C RPL24B SGDID:S000003380, Chr VII from 787784-787317, reverse complement, Verified ORF, Ribosomal protein L30 of the large (60S) ribosomal subunit, nearly identical to Rpl24Ap and has similarity to rat L24 ribosomal protein; not essential for tran	143.24	76.7397	1.86657
>YLL045C RPL8B SGDID:S000003968, Chr XII from 48628-47858, reverse complement, Verified ORF, Ribosomal protein L4 of the large (60S) ribosomal subunit, nearly identical to Rpl8Ap and has similarity to rat L7a ribosomal protein; mutation results in decreas	30.3772	16.3466	1.85832
>YAR007C RFA1 SGDID:S000000065, Chr I from 158621-156756, reverse complement, Verified ORF, Subunit of heterotrimeric Replication Protein A (RPA), which is a highly conserved single-stranded DNA binding protein involved in DNA replication, repair, and rec	232.301	125.344	1.8533
>YBR127C VMA2 SGDID:S000000331, Chr II from 492816-491263, reverse complement, Verified ORF, Subunit B of the eight-subunit V1 peripheral membrane domain of the vacuolar H+-ATPase (V-ATPase), an electrogenic proton pump found throughout the endomembrane s	164.756	89.6198	1.83839
>YBR072W HSP26 SGDID:S000000276, Chr II from 382027-382671, Verified ORF, Small heat shock protein (sHSP) with chaperone activity; forms hollow, sphere-shaped oligomers that suppress unfolded proteins aggregation; oligomer activation requires a heat-induc	480.43	261.43	1.8377
>YMR194W RPL36A SGDID:S000004807, Chr XIII from 651144-651159,651623-651909, Verified ORF, N-terminally acetylated protein component of the large (60S) ribosomal subunit, nearly identical to Rpl36Bp and has similarity to rat L36 ribosomal protein; binds t	243.33	133.197	1.82684
>YNL096C RPS7B SGDID:S000005040, Chr XIV from 444317-444174,443828-443400, reverse complement, Verified ORF, Protein component of the small (40S) ribosomal subunit, nearly identical to Rps7Ap; interacts with Kti11p; deletion causes hypersensitivity to zym	50.6235	28.0034	1.80776
>YGL245W GUS1 SGDID:S000003214, Chr VII from 39023-41149, Verified ORF, Glutamyl-tRNA synthetase (GluRS), forms a complex with methionyl-tRNA synthetase (Mes1p) and Arc1p; complex formation increases the catalytic efficiency of both tRNA synthetases and e	480.43	266.091	1.80551
>YBR189W RPS9B SGDID:S000000393, Chr II from 604503-604509,604923-605503, Verified ORF, Protein component of the small (40S) ribosomal subunit; nearly identical to Rps9Ap and has similarity to E. coli S4 and rat S9 ribosomal proteins;>YPL081W RPS9A SGDID	89.1316	50.3138	1.77152
>YML010W SPT5 SGDID:S000004470, Chr XIII from 247677-250868, Verified ORF, Protein that forms a complex with Spt4p and mediates both activation and inhibition of transcription elongation; Spt4p-Spt5p complex also plays a role in pre-mRNA processing	37.0916	20.9841	1.7676
>YLR043C TRX1 SGDID:S000004033, Chr XII from 232014-231703, reverse complement, Verified ORF, Cytoplasmic thioredoxin isoenzyme of the thioredoxin system which protects cells against oxidative and reductive stress, forms LMA1 complex with Pbi2p, acts as a	480.43	271.846	1.76729
>YIL069C RPS24B SGDID:S000001331, Chr IX from 232366-232364,231954-231550, reverse complement, Verified ORF, Protein component of the small (40S) ribosomal subunit; identical to Rps24Ap and has similarity to rat S24 ribosomal protein;>YER074W RPS24A SGDI	89.2681	51.3846	1.73725
>YGR204W ADE3 SGDID:S000003436, Chr VII from 905939-908779, Verified ORF, Cytoplasmic trifunctional enzyme C1-tetrahydrofolate synthase, involved in single carbon metabolism and required for biosynthesis of purines, thymidylate, methionine, and histidine	336.101	193.786	1.73439
>YNL132W KRE33 SGDID:S000005076, Chr XIV from 375323-378493, Verified ORF, Essential protein of unknown function; heterozygous mutant shows haploinsufficiency in K1 killer toxin resistance	480.43	278.588	1.72452
>YNL175C NOP13 SGDID:S000005119, Chr XIV from 308614-307403, reverse complement, Verified ORF, Protein of unknown function, localizes to the nucleolus and nucleoplasm; contains an RNA recognition motif (RRM) and has similarity to Nop12p, which is required	480.43	278.6	1.72445
>YDR381W YRA1 SGDID:S000002789, Chr IV from 1236551-1236835,1237602-1237997, Verified ORF, Nuclear protein that binds to RNA and to Mex67p, required for export of poly(A)+ mRNA from the nucleus; member of the REF (RNA and export factor binding proteins) f	214.58	124.471	1.72393
>YKL172W EBP2 SGDID:S000001655, Chr XI from 125764-127047, Verified ORF, Essential protein required for the maturation of 25S rRNA and 60S ribosomal subunit assembly, localizes to the nucleolus; constituent of 66S pre-ribosomal particles	375.608	218.238	1.72109
>YKL006W RPL14A SGDID:S000001489, Chr XI from 431549-431677,432076-432363, Verified ORF, N-terminally acetylated protein component of the large (60S) ribosomal subunit, nearly identical to Rpl14Bp and has similarity to rat L14 ribosomal protein; rpl14a cs	183.293	106.849	1.71544
>YLR406C RPL31B SGDID:S000004398, Chr XII from 931754-931698,931348-931064, reverse complement, Verified ORF, Protein component of the large (60S) ribosomal subunit, nearly identical to Rpl31Ap and has similarity to rat L31 ribosomal protein; associates w	251.127	146.552	1.71356
>YBR106W PHO88 SGDID:S000000310, Chr II from 452652-453218, Verified ORF, Probable membrane protein, involved in phosphate transport; pho88 pho86 double null mutant exhibits enhanced synthesis of repressible acid phosphatase at high inorganic phosphate co	480.43	280.405	1.71334
>YLR186W EMG1 SGDID:S000004176, Chr XII from 523634-524392, Verified ORF, Member of the alpha/beta knot fold methyltransferase superfamily; required for maturation of 18S rRNA and for 40S ribosome production; interacts with RNA and with S-adenosylmethioni	480.43	281.1	1.70911
>YOR133W EFT1 SGDID:S000005659, Chr XV from 575099-577627, Verified ORF, Elongation factor 2 (EF-2), also encoded by EFT2; catalyzes ribosomal translocation during protein synthesis; contains diphthamide, the unique posttranslationally modified histidine	149.982	89.226	1.68092
>YML074C FPR3 SGDID:S000004539, Chr XIII from 121324-120089, reverse complement, Verified ORF, Nucleolar peptidyl-prolyl cis-trans isomerase (PPIase); FK506 binding protein; phosphorylated by casein kinase II (Cka1p-Cka2p-Ckb1p-Ckb2p) and dephosphorylated	364.844	217.281	1.67914
>YKL068W NUP100 SGDID:S000001551, Chr XI from 309843-312722, Verified ORF, Subunit of the nuclear pore complex (NPC) that is localized to both sides of the pore; contains a repetitive GLFG motif that interacts with mRNA export factor Mex67p and with karyo	480.43	286.275	1.67821
>YAL042W ERV46 SGDID:S000000040, Chr I from 61317-62564, Verified ORF, Protein localized to COPII-coated vesicles, forms a complex with Erv41p; involved in the membrane fusion stage of transport	480.43	287.991	1.66821
>YDL213C NOP6 SGDID:S000002372, Chr IV from 77967-77290, reverse complement, Verified ORF, Putative RNA-binding protein implicated in ribosome biogenesis; contains an RNA recognition motif (RRM) and has similarity to hydrophilins; NOP6 may be a fungal-spe	480.43	288.425	1.6657
>YHR146W CRP1 SGDID:S000001189, Chr VIII from 390303-391700, Verified ORF, Protein that binds to cruciform DNA structures	480.43	292.196	1.64421
>YCL043C PDI1 SGDID:S000000548, Chr III from 50221-48653, reverse complement, Verified ORF, Protein disulfide isomerase, multifunctional protein resident in the endoplasmic reticulum lumen, essential for the formation of disulfide bonds in secretory and c	480.43	293.078	1.63926
>YER006W NUG1 SGDID:S000000808, Chr V from 162722-164284, Verified ORF, GTPase that associates with nuclear 60S pre-ribosomes, required for export of 60S ribosomal subunits from the nucleus	331.673	202.49	1.63797
>YLL021W SPA2 SGDID:S000003944, Chr XII from 100946-105346, Verified ORF, Component of the polarisome, which functions in actin cytoskeletal organization during polarized growth; acts as a scaffold for Mkk1p and Mpk1p cell wall integrity signaling compone	480.43	294.688	1.6303
>YFL045C SEC53 SGDID:S000001849, Chr VI from 44392-43628, reverse complement, Verified ORF, Phosphomannomutase, involved in synthesis of GDP-mannose and dolichol-phosphate-mannose; required for folding and glycosylation of secretory proteins in the ER lum	480.43	295.896	1.62364
>YJR105W ADO1 SGDID:S000003866, Chr X from 623570-624592, Verified ORF, Adenosine kinase, required for the utilization of S-adenosylmethionine (AdoMet); may be involved in recycling adenosine produced through the methyl cycle	480.43	296.146	1.62228
>YDL097C RPN6 SGDID:S000002255, Chr IV from 286695-285391, reverse complement, Verified ORF, Essential, non-ATPase regulatory subunit of the 26S proteasome lid required for the assembly and activity of the 26S proteasome; the human homolog (S9 protein) pa	480.43	297.951	1.61245
>YKL180W RPL17A SGDID:S000001663, Chr XI from 109274-109582,109889-110134, Verified ORF, Protein component of the large (60S) ribosomal subunit, nearly identical to Rpl17Bp and has similarity to E. coli L22 and rat L17 ribosomal proteins; copurifies with	43.743	27.2586	1.60474
>YKR057W RPS21A SGDID:S000001765, Chr XI from 551299-551322,551645-551884, Verified ORF, Protein component of the small (40S) ribosomal subunit; nearly identical to Rps21Bp and has similarity to rat S21 ribosomal protein	171.816	107.439	1.59919
>CON_LYSOZYME SWISS-PROT:P00698 Lysozyme C - Gallus gallus (Chicken).;>P00698 Lysozyme C OS=Gallus gallus GN=LYZ PE=1 SV=1	199.272	124.92	1.59519
>YNL079C TPM1 SGDID:S000005023, Chr XIV from 479166-478567, reverse complement, Verified ORF, Major isoform of tropomyosin; binds to and stabilizes actin cables and filaments, which direct polarized cell growth and the distribution of several organelles;	480.43	301.769	1.59205
>YNL061W NOP2 SGDID:S000005005, Chr XIV from 510541-512397, Verified ORF, Probable RNA m(5)C methyltransferase, essential for processing and maturation of 27S pre-rRNA and large ribosomal subunit biogenesis; localized to the nucleolus; constituent of 66S	329.738	208.587	1.58082
>YER069W ARG5,6 SGDID:S000000871, Chr V from 295408-297999, Verified ORF, Protein that is processed in the mitochondrion to yield acetylglutamate kinase and N-acetyl-gamma-glutamyl-phosphate reductase, which catalyze the 2nd and 3rd steps in arginine bios	480.43	305.027	1.57504
>YJR062C NTA1 SGDID:S000003823, Chr X from 554842-553469, reverse complement, Verified ORF, Amidase, removes the amide group from N-terminal asparagine and glutamine residues to generate proteins with N-terminal aspartate and glutamate residues that are t	480.43	305.484	1.57269
>CON_00708398.1 SWISS-PROT:P02769 (Bos taurus) Bovine serum albumin precursor;>P02769 SWISS-PROT:P02769 (Bos taurus) Bovine serum albumin precursor	196.228	125.285	1.56626
>YDR429C TIF35 SGDID:S000002837, Chr IV from 1325294-1324470, reverse complement, Verified ORF, Subunit of the core complex of translation initiation factor 3(eIF3), which is essential for translation	358.602	229.095	1.56529
>YBL092W RPL32 SGDID:S000000188, Chr II from 45975-46367, Verified ORF, Protein component of the large (60S) ribosomal subunit, has similarity to rat L32 ribosomal protein; overexpression disrupts telomeric silencing	105.427	68.257	1.54456
>YDR371W CTS2 SGDID:S000002779, Chr IV from 1219406-1220941, Uncharacterized ORF, Sporulation-specific chitinase	116.457	75.4199	1.54412
>YBL041W PRE7 SGDID:S000000137, Chr II from 141250-141975, Verified ORF, Beta 6 subunit of the 20S proteasome	480.43	312.467	1.53754
>YJR104C SOD1 SGDID:S000003865, Chr X from 623003-622539, reverse complement, Verified ORF, Cytosolic superoxide dismutase; some mutations are analogous to those that cause ALS (amyotrophic lateral sclerosis) in humans	296.362	192.796	1.53718
>YOL103W-B YOL103W-B SGDID:S000007350, Chr XV from 118000-119304,119306-123268, transposable_element_gene, Retrotransposon TYA Gag and TYB Pol genes; transcribed/translated as one unit; polyprotein is processed to make a nucleocapsid-like protein (Gag), r	179.76	117.675	1.5276
>YBR191W RPL21A SGDID:S000000395, Chr II from 606265-606275,606664-607135, Verified ORF, Protein component of the large (60S) ribosomal subunit, nearly identical to Rpl21Bp and has similarity to rat L21 ribosomal protein;>YPL079W RPL21B SGDID:S000006000,	166.845	109.357	1.52569
>YOR020C HSP10 SGDID:S000005546, Chr XV from 370844-370524, reverse complement, Verified ORF, Mitochondrial matrix co-chaperonin that inhibits the ATPase activity of Hsp60p, a mitochondrial chaperonin; involved in protein folding and sorting in the mitoch	480.43	315.949	1.5206
>YJL034W KAR2 SGDID:S000003571, Chr X from 381322-383370, Verified ORF, ATPase involved in protein import into the ER, also acts as a chaperone to mediate protein folding in the ER and may play a role in ER export of soluble proteins; regulates the unfold	188.718	124.186	1.51965
>YER138C YER138C SGDID:S000000940, Chr V from 449020-447719,447717-443752, reverse complement, transposable_element_gene, Retrotransposon TYA Gag and TYB Pol genes; transcribed/translated as one unit; polyprotein is processed to make a nucleocapsid-like p	167.051	109.998	1.51868
>YNL069C RPL16B SGDID:S000005013, Chr XIV from 495002-494975,494525-493957, reverse complement, Verified ORF, N-terminally acetylated protein component of the large (60S) ribosomal subunit, binds to 5.8 S rRNA; has similarity to Rpl16Ap, E. coli L13 and r	104.021	68.8484	1.51087
>YLR222C UTP13 SGDID:S000004212, Chr XII from 581773-579320, reverse complement, Verified ORF, Nucleolar protein, component of the small subunit (SSU) processome containing the U3 snoRNA that is involved in processing of pre-18S rRNA	352.789	233.601	1.51022
>YPL271W ATP15 SGDID:S000006192, Chr XVI from 30079-30267, Verified ORF, Epsilon subunit of the F1 sector of mitochondrial F1F0 ATP synthase, which is a large, evolutionarily conserved enzyme complex required for ATP synthesis; phosphorylated	480.43	319.214	1.50504
>YBR084C-A RPL19A SGDID:S000002156, Chr II from 415255-415254,414747-414180, reverse complement, Verified ORF, Protein component of the large (60S) ribosomal subunit, nearly identical to Rpl19Bp and has similarity to rat L19 ribosomal protein; rpl19a and	62.0188	41.2521	1.50341
>YPL220W RPL1A SGDID:S000006141, Chr XVI from 135789-136442, Verified ORF, N-terminally acetylated protein component of the large (60S) ribosomal subunit, nearly identical to Rpl1Bp and has similarity to E. coli L1 and rat L10a ribosomal proteins; rpl1a r	95.063	63.5687	1.49544
>YER110C KAP123 SGDID:S000000912, Chr V from 382099-378758, reverse complement, Verified ORF, Karyopherin beta, mediates nuclear import of ribosomal proteins prior to assembly into ribosomes and import of histones H3 and H4; localizes to the nuclear pore,	318.532	214.233	1.48685
>YFL005W SEC4 SGDID:S000001889, Chr VI from 130329-130976, Verified ORF, Secretory vesicle-associated Rab GTPase essential for exocytosis; associates with the exocyst component Sec15p and may regulate polarized delivery of transport vesicles to the exocys	480.43	327.033	1.46906
>YLR259C HSP60 SGDID:S000004249, Chr XII from 665004-663286, reverse complement, Verified ORF, Tetradecameric mitochondrial chaperonin required for ATP-dependent folding of precursor polypeptides and complex assembly; prevents aggregation and mediates pro	85.2781	58.1919	1.46546
>YAL012W CYS3 SGDID:S000000010, Chr I from 130802-131986, Verified ORF, Cystathionine gamma-lyase, catalyzes one of the two reactions involved in the transsulfuration pathway that yields cysteine from homocysteine with the intermediary formation of cystat	480.43	328.828	1.46104
>YLR454W YLR454W SGDID:S000004446, Chr XII from 1043996-1051882, Uncharacterized ORF, Putative protein of unknown function; the authentic, non-tagged protein is detected in highly purified mitochondria in high-throughput studies	480.43	329.092	1.45986
>YJL050W MTR4 SGDID:S000003586, Chr X from 342517-345738, Verified ORF, Dead-box family ATP dependent helicase required for mRNA export from the nucleus; co-factor of the exosome complex, required for 3 end formation of 5.8S rRNA	480.43	329.202	1.45938
>YOR142W-B YOR142W-B SGDID:S000007352, Chr XV from 595113-596417,596419-600381, transposable_element_gene, Retrotransposon TYA Gag and TYB Pol genes; transcribed/translated as one unit; polyprotein is processed to make a nucleocapsid-like protein (Gag), r	178.456	122.325	1.45887
>YPR191W QCR2 SGDID:S000006395, Chr XVI from 919377-920483, Verified ORF, Subunit 2 of the ubiquinol cytochrome-c reductase complex, which is a component of the mitochondrial inner membrane electron transport chain; phosphorylated; transcription is regula	100.001	68.7227	1.45513
>YPR137C-B YPR137C-B SGDID:S000007360, Chr XVI from 810265-808961,808959-804997, reverse complement, transposable_element_gene, Retrotransposon TYA Gag and TYB Pol genes; transcribed/translated as one unit; polyprotein is processed to make a nucleocapsid-	93.4107	64.2049	1.45488
>YLL018C DPS1 SGDID:S000003941, Chr XII from 111574-109901, reverse complement, Verified ORF, Cytoplasmic aspartyl-tRNA synthetase, homodimeric enzyme that catalyzes the specific aspartylation of tRNA(Asp); class II aminoacyl tRNA synthetase; binding to i	317.541	220.663	1.43903
>YGR054W YGR054W SGDID:S000003286, Chr VII from 596697-598625, Verified ORF, Eukaryotic initiation factor (eIF) 2A; associates specifically with both 40S subunits and 80 S ribosomes, and interacts genetically with both eIF5b and eIF4E; homologous to mamma	480.43	334.316	1.43705
>YLR448W RPL6B SGDID:S000004440, Chr XII from 1028850-1028864,1029249-1029764, Verified ORF, Protein component of the large (60S) ribosomal subunit, has similarity to Rpl6Ap and to rat L6 ribosomal protein; binds to 5.8S rRNA	37.9593	26.424	1.43655
>YMR290C HAS1 SGDID:S000004903, Chr XIII from 851590-850073, reverse complement, Verified ORF, ATP-dependent RNA helicase; localizes to both the nuclear periphery and nucleolus; highly enriched in nuclear pore complex fractions; constituent of 66S pre-rib	480.43	334.765	1.43513
>YMR012W CLU1 SGDID:S000004614, Chr XIII from 291133-294966, Verified ORF, eIF3 component of unknown function; deletion causes defects in mitochondrial organization but not in growth or translation initiation, can rescue cytokinesis and mitochondrial orga	315.667	221.99	1.42199
>YJL191W RPS14B SGDID:S000003727, Chr X from 73786-73795,74204-74610, Verified ORF, Ribosomal protein 59 of the small subunit, required for ribosome assembly and 20S pre-rRNA processing; mutations confer cryptopleurine resistance; nearly identical to Rps1	40.2019	28.3494	1.41809
>YJL130C URA2 SGDID:S000003666, Chr X from 172364-165720, reverse complement, Verified ORF, Bifunctional carbamoylphosphate synthetase (CPSase)-aspartate transcarbamylase (ATCase), catalyzes the first two enzymatic steps in the de novo biosynthesis of pyr	84.0312	59.6074	1.40974
>YPL257W-A YPL257W-A SGDID:S000007357, Chr XVI from 56748-58070, transposable_element_gene, Retrotransposon TYA Gag gene co-transcribed with TYB Pol; translated as TYA or TYA-TYB polyprotein; Gag is a nucleocapsid protein that is the structural constituen	199.625	141.629	1.40949
>YLR109W AHP1 SGDID:S000004099, Chr XII from 368782-369312, Verified ORF, Thiol-specific peroxiredoxin, reduces hydroperoxides to protect against oxidative damage; function in vivo requires covalent conjugation to Urm1p	330.712	235.249	1.40579
>YJL033W HCA4 SGDID:S000003570, Chr X from 383832-386144, Verified ORF, Putative nucleolar DEAD box RNA helicase; high-copy number suppression of a U14 snoRNA processing mutant suggests an involvement in 18S rRNA synthesis	480.43	344.799	1.39336
>YEL036C ANP1 SGDID:S000000762, Chr V from 84552-83050, reverse complement, Verified ORF, Subunit of the alpha-1,6 mannosyltransferase complex; type II membrane protein; has a role in retention of glycosyltransferases in the Golgi; involved in osmotic sen	333.555	240.031	1.38963
>YNL162W RPL42A SGDID:S000005106, Chr XIV from 331324-331327,331840-332156, Verified ORF, Protein component of the large (60S) ribosomal subunit, identical to Rpl42Bp and has similarity to rat L44 ribosomal protein;>YHR141C RPL42B SGDID:S000001183, Chr V	480.43	346.298	1.38733
>YIL078W THS1 SGDID:S000001340, Chr IX from 212496-214700, Verified ORF, Threonyl-tRNA synthetase, essential cytoplasmic protein	398.804	287.772	1.38583
>YOR182C RPS30B SGDID:S000005708, Chr XV from 678794-678792,678380-678192, reverse complement, Verified ORF, Protein component of the small (40S) ribosomal subunit; nearly identical to Rps30Ap and has similarity to rat S30 ribosomal protein;>YLR287C-A RP	203.018	146.517	1.38563
>YPL126W NAN1 SGDID:S000006047, Chr XVI from 310209-312899, Verified ORF, U3 snoRNP protein, component of the small (ribosomal) subunit (SSU) processosome containing U3 snoRNA; required for the biogenesis of18S rRNA	480.43	347.007	1.3845
>YER121W YER121W SGDID:S000000923, Chr V from 402371-402715, Uncharacterized ORF, Putative protein of unknown function; may be involved in phosphatase regulation and/or generation of precursor metabolites and energy	480.43	347.37	1.38305
>YHR193C EGD2 SGDID:S000001236, Chr VIII from 488236-487712, reverse complement, Verified ORF, Alpha subunit of the heteromeric nascent polypeptide-associated complex (NAC) involved in protein sorting and translocation, associated with cytoplasmic ribosom	265.802	192.624	1.3799
>YDL185W TFP1 SGDID:S000002344, Chr IV from 126788-130003, Verified ORF, Vacuolar ATPase V1 domain subunit A containing the catalytic nucleotide binding sites; protein precursor undergoes self-catalyzed splicing to yield the extein Tfp1p and the intein Vd	188.717	137.42	1.37329
>YNL067W RPL9B SGDID:S000005011, Chr XIV from 499682-500257, Verified ORF, Protein component of the large (60S) ribosomal subunit, nearly identical to Rpl9Ap and has similarity to E. coli L6 and rat L9 ribosomal proteins	221.528	161.579	1.37102
>YOL127W RPL25 SGDID:S000005487, Chr XV from 80348-80360,80775-81190, Verified ORF, Primary rRNA-binding ribosomal protein component of the large (60S) ribosomal subunit, has similarity to E. coli L23 and rat L23a ribosomal proteins; binds to 26S rRNA via	84.7208	62.1309	1.36359
>YBR089C-A NHP6B SGDID:S000002157, Chr II from 426483-426184, reverse complement, Verified ORF, High-mobility group non-histone chromatin protein, functionally redundant with Nhp6Ap; homologous to mammalian high mobility group proteins 1 and 2; acts to re	480.43	353.564	1.35882
>YOL086C ADH1 SGDID:S000005446, Chr XV from 160594-159548, reverse complement, Verified ORF, Alcohol dehydrogenase, fermentative isozyme active as homo- or heterotetramers; required for the reduction of acetaldehyde to ethanol, the last step in the glycol	92.77	68.3734	1.35682
>YCL037C SRO9 SGDID:S000000542, Chr III from 58678-57374, reverse complement, Verified ORF, Cytoplasmic RNA-binding protein that associates with translating ribosomes; involved in heme regulation of Hap1p as a component of the HMC complex, also involved i	218.849	162.007	1.35087
>YDR172W SUP35 SGDID:S000002579, Chr IV from 808322-810379, Verified ORF, Translation termination factor eRF3; altered protein conformation creates the [PSI(+)] prion, a dominant cytoplasmically inherited protein aggregate that alters translational fideli	23.8322	17.6459	1.35058
>YPR159W KRE6 SGDID:S000006363, Chr XVI from 857579-859741, Verified ORF, Protein required for beta-1,6 glucan biosynthesis; putative beta-glucan synthase; appears functionally redundant with Skn1p	480.43	357.644	1.34332
>YNL135C FPR1 SGDID:S000005079, Chr XIV from 372228-371884, reverse complement, Verified ORF, Peptidyl-prolyl cis-trans isomerase (PPIase), binds to the drugs FK506 and rapamycin; also binds to the nonhistone chromatin binding protein Hmo1p and may regula	480.43	358.121	1.34153
>YGR193C PDX1 SGDID:S000003425, Chr VII from 885746-884514, reverse complement, Verified ORF, Dihydrolipoamide dehydrogenase (E3)-binding protein (E3BP) of the mitochondrial pyruvate dehydrogenase (PDH) complex, plays a structural role in the complex by b	281.664	210.344	1.33906
>YLR029C RPL15A SGDID:S000004019, Chr XII from 202591-201977, reverse complement, Verified ORF, Protein component of the large (60S) ribosomal subunit, nearly identical to Rpl15Bp and has similarity to rat L15 ribosomal protein; binds to 5.8 S rRNA;>YMR1	77.2445	58.2636	1.32578
>YLR325C RPL38 SGDID:S000004317, Chr XII from 781379-781143, reverse complement, Verified ORF, Protein component of the large (60S) ribosomal subunit, has similarity to rat L38 ribosomal protein	63.6971	48.5741	1.31134
>YJL177W RPL17B SGDID:S000003713, Chr X from 90784-91092,91410-91655, Verified ORF, Protein component of the large (60S) ribosomal subunit, nearly identical to Rpl17Ap and has similarity to E. coli L22 and rat L17 ribosomal proteins	90.1387	68.9068	1.30812
>YGL030W RPL30 SGDID:S000002998, Chr VII from 439096-439098,439329-439643, Verified ORF, Protein component of the large (60S) ribosomal subunit, has similarity to rat L30 ribosomal protein; involved in pre-rRNA processing in the nucleolus; autoregulates s	128.551	98.3677	1.30684
>YER025W GCD11 SGDID:S000000827, Chr V from 205250-206833, Verified ORF, Gamma subunit of the translation initiation factor eIF2, involved in the identification of the start codon; binds GTP when forming the ternary complex with GTP and tRNAi-Met	74.4958	57.0179	1.30653
>YOR280C FSH3 SGDID:S000005806, Chr XV from 845791-844991, reverse complement, Verified ORF, Serine hydrolase; sequence is similar to Fsh1p and Fsh2p	480.43	367.866	1.30599
>YDR032C PST2 SGDID:S000002439, Chr IV from 504693-504097, reverse complement, Verified ORF, Protein with similarity to members of a family of flavodoxin-like proteins; induced by oxidative stress in a Yap1p dependent manner; the authentic, non-tagged pro	480.43	367.994	1.30554
>YOR312C RPL20B SGDID:S000005839, Chr XV from 901191-901191,900764-900247, reverse complement, Verified ORF, Protein component of the large (60S) ribosomal subunit, nearly identical to Rpl20Ap and has similarity to rat L18a ribosomal protein;>YMR242C RPL	99.4409	76.1774	1.30539
>YGL195W GCN1 SGDID:S000003163, Chr VII from 131531-139549, Verified ORF, Positive regulator of the Gcn2p kinase activity, forms a complex with Gcn20p; proposed to stimulate Gcn2p activation by an uncharged tRNA	326.819	250.525	1.30454
>YBL099W ATP1 SGDID:S000000195, Chr II from 37050-38687, Verified ORF, Alpha subunit of the F1 sector of mitochondrial F1F0 ATP synthase, which is a large, evolutionarily conserved enzyme complex required for ATP synthesis; phosphorylated	152.094	116.897	1.30109
>Q86YZ3 SWISS-PROT:Q86YZ3 Tax_Id=9606 Gene_Symbol=HRNR Hornerin	480.43	369.522	1.30014
>YAL035W FUN12 SGDID:S000000033, Chr I from 76428-79436, Verified ORF, GTPase, required for general translation initiation by promoting Met-tRNAiMet binding to ribosomes and ribosomal subunit joining; homolog of bacterial IF2	136.116	104.864	1.29803
>YGL103W RPL28 SGDID:S000003071, Chr VII from 310970-311018,311530-311930, Verified ORF, Ribosomal protein of the large (60S) ribosomal subunit, has similarity to E. coli L15 and rat L27a ribosomal proteins; may have peptidyl transferase activity; can mut	90.8075	70.1509	1.29446
>YDR060W MAK21 SGDID:S000002467, Chr IV from 570647-573724, Verified ORF, Constituent of 66S pre-ribosomal particles, required for large (60S) ribosomal subunit biogenesis; involved in nuclear export of pre-ribosomes; required for maintenance of dsRNA vir	275.244	213.345	1.29013
>YLR330W CHS5 SGDID:S000004322, Chr XII from 787664-789679, Verified ORF, Component of the exomer complex, which also contains Csh6p, Bch1p, Bch2p, and Bud7p and is involved in export of selected proteins, such as chitin synthase Chs3p, from the Golgi to	480.43	372.424	1.29001
>YLR197W SIK1 SGDID:S000004187, Chr XII from 546099-547613, Verified ORF, Essential evolutionarily-conserved nucleolar protein component of the box C/D snoRNP complexes that direct 2-O-methylation of pre-rRNA during its maturation; overexpression causes	122.104	94.6828	1.28961
>YAL059W ECM1 SGDID:S000000055, Chr I from 36510-37148, Verified ORF, Protein of unknown function, localized in the nucleoplasm and the nucleolus, genetically interacts with MTR2 in 60S ribosomal protein subunit export	480.43	372.897	1.28837
>YPL090C RPS6A SGDID:S000006011, Chr XVI from 378392-378387,377992-377288, reverse complement, Verified ORF, Protein component of the small (40S) ribosomal subunit; identical to Rps6Bp and has similarity to rat S6 ribosomal protein;>YBR181C RPS6B SGDID:S	50.4668	39.2398	1.28611
>YNL208W YNL208W SGDID:S000005152, Chr XIV from 254419-255018, Verified ORF, Protein of unknown function; may interact with ribosomes, based on co-purification experiments; authentic, non-tagged protein is detected in purified mitochondria in high-through	480.43	373.837	1.28513
>YLR026C SED5 SGDID:S000004016, Chr XII from 196473-195451, reverse complement, Verified ORF, cis-Golgi t-SNARE syntaxin required for vesicular transport between the ER and the Golgi complex, binds at least 9 SNARE proteins	480.43	374.95	1.28132
>YPL048W CAM1 SGDID:S000005969, Chr XVI from 464398-465645, Verified ORF, Nuclear protein required for transcription of MXR1; binds the MXR1 promoter in the presence of other nuclear factors; binds calcium and phospholipids; has similarity to translationa	480.43	376.752	1.27519
>YNR016C ACC1 SGDID:S000005299, Chr XIV from 661376-654675, reverse complement, Verified ORF, Acetyl-CoA carboxylase, biotin containing enzyme that catalyzes the carboxylation of acetyl-CoA to form malonyl-CoA; required for de novo biosynthesis of long-ch	185.365	145.81	1.27128
>YGL048C RPT6 SGDID:S000003016, Chr VII from 411289-410072, reverse complement, Verified ORF, One of six ATPases of the 19S regulatory particle of the 26S proteasome involved in the degradation of ubiquitinated substrates; bound by ubiquitin-protein ligas	328.339	258.771	1.26884
>YEL034W HYP2 SGDID:S000000760, Chr V from 85676-86149, Verified ORF, Translation initiation factor eIF-5A, promotes formation of the first peptide bond; similar to and functionally redundant with Anb1p; possible role in translation elongation; undergoes	264.283	209.73	1.26011
>YPL249C-A RPL36B SGDID:S000006438, Chr XVI from 76239-76224,75985-75699, reverse complement, Verified ORF, Protein component of the large (60S) ribosomal subunit, nearly identical to Rpl36Ap and has similarity to rat L36 ribosomal protein; binds to 5.8 S	90.9604	72.2034	1.25978
>YJR009C TDH2 SGDID:S000003769, Chr X from 454674-453676, reverse complement, Verified ORF, Glyceraldehyde-3-phosphate dehydrogenase, isozyme 2, involved in glycolysis and gluconeogenesis; tetramer that catalyzes the reaction of glyceraldehyde-3-phosphate	212.327	168.826	1.25767
>YOR027W STI1 SGDID:S000005553, Chr XV from 381053-382822, Verified ORF, Hsp90 cochaperone, interacts with the Ssa group of the cytosolic Hsp70 chaperones; activates the ATPase activity of Ssa1p; homolog of mammalian Hop protein	336.64	267.94	1.2564
>YJL173C RFA3 SGDID:S000003709, Chr X from 96527-96159, reverse complement, Verified ORF, Subunit of heterotrimeric Replication Protein A (RPA), which is a highly conserved single-stranded DNA binding protein involved in DNA replication, repair, and recom	480.43	382.7	1.25537
>YJL080C SCP160 SGDID:S000003616, Chr X from 289221-285553, reverse complement, Verified ORF, Essential RNA-binding G protein effector of mating response pathway, mainly associated with nuclear envelope and ER, interacts in mRNA-dependent manner with tran	480.43	383.379	1.25315
>YGR128C UTP8 SGDID:S000003360, Chr VII from 750096-747955, reverse complement, Verified ORF, Nucleolar protein required for export of tRNAs from the nucleus; also copurifies with the small subunit (SSU) processome containing the U3 snoRNA that is involve	480.43	384.14	1.25066
>YDL075W RPL31A SGDID:S000002233, Chr IV from 322226-322282,322704-322988, Verified ORF, Protein component of the large (60S) ribosomal subunit, nearly identical to Rpl31Bp and has similarity to rat L31 ribosomal protein; associates with the karyopherin S	132.924	106.316	1.25028
>YOR198C BFR1 SGDID:S000005724, Chr XV from 720066-718654, reverse complement, Verified ORF, Component of mRNP complexes associated with polyribosomes; implicated in secretion and nuclear segregation; multicopy suppressor of BFA (Brefeldin A) sensitivity	357.503	286.407	1.24823
>YJR027W YJR027W SGDID:S000003788, Chr X from 472753-474054,474056-478021, transposable_element_gene, Retrotransposon TYA Gag and TYB Pol genes; transcribed/translated as one unit; polyprotein is processed to make a nucleocapsid-like protein (Gag), revers	119.764	96.1372	1.24576
>YDR188W CCT6 SGDID:S000002596, Chr IV from 836419-838059, Verified ORF, Subunit of the cytosolic chaperonin Cct ring complex, related to Tcp1p, essential protein that is required for the assembly of actin and tubulins in vivo; contains an ATP-binding mot	480.43	386.133	1.24421
>YMR124W YMR124W SGDID:S000004731, Chr XIII from 514455-517286, Uncharacterized ORF, Protein of unknown function; green fluorescent protein (GFP)-fusion protein localizes to the cell periphery, cytoplasm, bud, and bud neck; interacts with Crm1p in two-hyb	347.131	280.852	1.236
>YOR298C-A MBF1 SGDID:S000007253, Chr XV from 877684-877229, reverse complement, Verified ORF, Transcriptional coactivator that bridges the DNA-binding region of Gcn4p and TATA-binding protein Spt15p; suppressor of frameshift mutations	314.386	255.611	1.22994
>YHR010W RPL27A SGDID:S000001052, Chr VIII from 126515-126545,127107-127486, Verified ORF, Protein component of the large (60S) ribosomal subunit, nearly identical to Rpl27Bp and has similarity to rat L27 ribosomal protein;>YDR471W RPL27B SGDID:S00000287	39.4465	32.1677	1.22628
>YPL004C LSP1 SGDID:S000005925, Chr XVI from 551654-550629, reverse complement, Verified ORF, Primary component of eisosomes, which are large immobile patch structures at the cell cortex associated with endocytosis, along with Pil1p and Sur7p; null mutant	238.884	194.957	1.22532
>YPR158W-B YPR158W-B SGDID:S000007364, Chr XVI from 844705-846009,846011-849976, transposable_element_gene, Retrotransposon TYA Gag and TYB Pol genes; transcribed/translated as one unit; polyprotein is processed to make a nucleocapsid-like protein (Gag),	122.271	99.8162	1.22496
>YBL076C ILS1 SGDID:S000000172, Chr II from 84259-81041, reverse complement, Verified ORF, Cytoplasmic isoleucine-tRNA synthetase, target of the G1-specific inhibitor reveromycin A	480.43	393.236	1.22174
>YKL016C ATP7 SGDID:S000001499, Chr XI from 407632-407108, reverse complement, Verified ORF, Subunit d of the stator stalk of mitochondrial F1F0 ATP synthase, which is a large, evolutionarily conserved enzyme complex required for ATP synthesis	480.43	394.387	1.21817
>YPR163C TIF3 SGDID:S000006367, Chr XVI from 869951-868641, reverse complement, Verified ORF, Translation initiation factor eIF-4B, has RNA annealing activity; contains an RNA recognition motif and binds to single-stranded RNA	480.43	397.499	1.20863
>YDR171W HSP42 SGDID:S000002578, Chr IV from 806619-807746, Verified ORF, Small heat shock protein (sHSP) with chaperone activity; forms barrel-shaped oligomers that suppress unfolded protein aggregation; involved in cytoskeleton reorganization after heat	480.43	397.838	1.2076
>YDR500C RPL37B SGDID:S000002908, Chr IV from 1450846-1450840,1450450-1450191, reverse complement, Verified ORF, Protein component of the large (60S) ribosomal subunit, has similarity to Rpl37Ap and to rat L37 ribosomal protein	268.815	223.512	1.20269
>YPL226W NEW1 SGDID:S000006147, Chr XVI from 121767-125357, Verified ORF, ATP binding cassette family member; Asn/Gln-rich rich region supports [NU+] prion formation, susceptibility to [PSI+] prion induction and aggregation of a fragment of the human Mach	231.254	192.603	1.20068
>YPR154W PIN3 SGDID:S000006358, Chr XVI from 834561-835208, Verified ORF, Protein that induces appearance of [PIN+] prion when overproduced	480.43	400.346	1.20004
>YHR174W ENO2 SGDID:S000001217, Chr VIII from 451327-452640, Verified ORF, Enolase II, a phosphopyruvate hydratase that catalyzes the conversion of 2-phosphoglycerate to phosphoenolpyruvate during glycolysis and the reverse reaction during gluconeogenesis	41.17	34.3301	1.19924
>YDR454C GUK1 SGDID:S000002862, Chr IV from 1366820-1366257, reverse complement, Verified ORF, Guanylate kinase, converts GMP to GDP; required for growth and mannose outer chain elongation of cell wall N-linked glycoproteins	480.43	401.248	1.19734
>YPR043W RPL43A SGDID:S000006247, Chr XVI from 654163-654164,654568-654844, Verified ORF, Protein component of the large (60S) ribosomal subunit, identical to Rpl43Bp and has similarity to rat L37a ribosomal protein; null mutation confers a dominant letha	122.713	102.659	1.19534
>YGR253C PUP2 SGDID:S000003485, Chr VII from 999145-998363, reverse complement, Verified ORF, Alpha 5 subunit of the 20S proteasome involved in ubiquitin-dependent catabolism; human homolog is subunit zeta	338.471	283.236	1.19501
>YIL075C RPN2 SGDID:S000001337, Chr IX from 220697-217860, reverse complement, Verified ORF, Subunit of the 26S proteasome, substrate of the N-acetyltransferase Nat1p	361.213	302.773	1.19302
>YDL051W LHP1 SGDID:S000002209, Chr IV from 363952-364779, Verified ORF, RNA binding protein required for maturation of tRNA and snRNA precursors; acts as a molecular chaperone for RNAs transcribed by polymerase III; homologous to human La (SS-B) autoanti	480.43	402.709	1.193
>YML123C PHO84 SGDID:S000004592, Chr XIII from 25801-24038, reverse complement, Verified ORF, High-affinity inorganic phosphate (Pi) transporter and low-affinity manganese transporter; regulated by Pho4p and Spt7p; mutation confers resistance to arsenate;	377.131	316.808	1.19041
>YBR080C SEC18 SGDID:S000000284, Chr II from 400884-398608, reverse complement, Verified ORF, ATPase required for the release of Sec17p during the priming step in homotypic vacuole fusion and for ER to Golgi transport; homolog of the mammalian NSF	480.43	404.134	1.18879
>YLR333C RPS25B SGDID:S000004325, Chr XII from 795899-795573, reverse complement, Verified ORF, Protein component of the small (40S) ribosomal subunit; nearly identical to Rps25Ap and has similarity to rat S25 ribosomal protein;>YGR027C RPS25A SGDID:S000	141.246	118.992	1.18703
>YDL126C CDC48 SGDID:S000002284, Chr IV from 238664-236157, reverse complement, Verified ORF, ATPase in ER, nuclear membrane and cytosol with homology to mammalian p97; in a complex with Npl4p and Ufd1p participates in retrotranslocation of ubiquitinated	59.5618	50.4048	1.18167
>YDR353W TRR1 SGDID:S000002761, Chr IV from 1183293-1184252, Verified ORF, Cytoplasmic thioredoxin reductase, key regulatory enzyme that determines the redox state of the thioredoxin system, which acts as a disulfide reductase system and protects cells ag	480.43	407.368	1.17935
>YHL001W RPL14B SGDID:S000000993, Chr VIII from 104272-104400,104799-105086, Verified ORF, Protein component of the large (60S) ribosomal subunit, nearly identical to Rpl14Ap and has similarity to rat L14 ribosomal protein	65.0871	55.8654	1.16507
>YER002W NOP16 SGDID:S000000804, Chr V from 156802-157497, Verified ORF, Constituent of 66S pre-ribosomal particles, involved in 60S ribosomal subunit biogenesis	480.43	413.071	1.16307
>YCL064C CHA1 SGDID:S000000569, Chr III from 16880-15798, reverse complement, Verified ORF, Catabolic L-serine (L-threonine) deaminase, catalyzes the degradation of both L-serine and L-threonine; required to use serine or threonine as the sole nitrogen so	480.43	413.292	1.16245
>YJR077C MIR1 SGDID:S000003838, Chr X from 578183-577248, reverse complement, Verified ORF, Mitochondrial phosphate carrier, imports inorganic phosphate into mitochondria; functionally redundant with Pic2p but more abundant than Pic2p under normal conditi	480.43	413.688	1.16134
>YLR221C RSA3 SGDID:S000004211, Chr XII from 579026-578364, reverse complement, Verified ORF, Protein with a likely role in ribosomal maturation, required for accumulation of wild-type levels of large (60S) ribosomal subunits; binds to the helicase Dbp6p	480.43	414.355	1.15947
>YER166W DNF1 SGDID:S000000968, Chr V from 512739-517454, Verified ORF, Aminophospholipid translocase (flippase) that localizes primarily to the plasma membrane; contributes to endocytosis, protein transport and cell polarity; type 4 P-type ATPase	480.43	414.358	1.15946
>YCR028C-A RIM1 SGDID:S000007222, Chr III from 173436-173195,173111-172946, reverse complement, Verified ORF, Single-stranded DNA-binding protein essential for mitochondrial genome maintenance; involved in mitochondrial DNA replication	111.329	96.0312	1.1593
>YHR027C RPN1 SGDID:S000001069, Chr VIII from 164704-161723, reverse complement, Verified ORF, Non-ATPase base subunit of the 19S regulatory particle of the 26S proteasome; may participate in the recognition of several ligands of the proteasome; contains	340.802	294.442	1.15745
>YMR216C SKY1 SGDID:S000004829, Chr XIII from 701038-698810, reverse complement, Verified ORF, SR protein kinase (SRPK) involved in regulating proteins involved in mRNA metabolism and cation homeostasis; similar to human SRPK1	480.43	415.375	1.15662
>YKL048C ELM1 SGDID:S000001531, Chr XI from 348780-346858, reverse complement, Verified ORF, Serine/threonine protein kinase that regulates cellular morphogenesis, septin behavior, and cytokinesis; required for the regulation of other kinases; forms part	480.43	415.428	1.15647
>YCR012W PGK1 SGDID:S000000605, Chr III from 137744-138994, Verified ORF, 3-phosphoglycerate kinase, catalyzes transfer of high-energy phosphoryl groups from the acyl phosphate of 1,3-bisphosphoglycerate to ADP to produce ATP; key enzyme in glycolysis and	56.7431	49.0789	1.15616
>YBR084W MIS1 SGDID:S000000288, Chr II from 411048-413975, Verified ORF, Mitochondrial C1-tetrahydrofolate synthase, involved in interconversion between different oxidation states of tetrahydrofolate (THF); provides activities of formyl-THF synthetase, me	353.992	306.627	1.15447
>YGR032W GSC2 SGDID:S000003264, Chr VII from 548268-553955, Verified ORF, Catalytic subunit of 1,3-beta-glucan synthase, involved in formation of the inner layer of the spore wall; activity positively regulated by Rho1p and negatively by Smk1p; has simila	77.7057	67.3598	1.15359
>YPL019C VTC3 SGDID:S000005940, Chr XVI from 517016-514509, reverse complement, Verified ORF, Vacuolar membrane protein involved in vacuolar polyphosphate accumulation; functions as a regulator of vacuolar H+-ATPase activity and vacuolar transporter chape	361.391	314.738	1.14823
>YGL148W ARO2 SGDID:S000003116, Chr VII from 226404-227534, Verified ORF, Bifunctional chorismate synthase and flavin reductase, catalyzes the conversion of 5-enolpyruvylshikimate 3-phosphate (EPSP) to form chorismate, which is a precursor to aromatic ami	480.43	418.947	1.14676
>YLR060W FRS1 SGDID:S000004050, Chr XII from 260980-262767, Verified ORF, Beta subunit of cytoplasmic phenylalanyl-tRNA synthetase, forms a tetramer with Frs2p to generate active enzyme; sequence is evolutionarily distant from mitochondrial phenylalanyl-t	480.43	419.188	1.1461
>YLR175W CBF5 SGDID:S000004165, Chr XII from 506136-507587, Verified ORF, Pseudouridine synthase catalytic subunit of box H/ACA small nucleolar ribonucleoprotein particles (snoRNPs), acts on both large and small rRNAs and on snRNA U2	152.456	133.209	1.14449
>YGL105W ARC1 SGDID:S000003073, Chr VII from 307440-308570, Verified ORF, Protein that binds tRNA and methionyl- and glutamyl-tRNA synthetases (Mes1p and Gus1p), delivering tRNA to them, stimulating catalysis, and ensuring their localization to the cytopl	375.608	328.225	1.14436
>YEL054C RPL12A SGDID:S000000780, Chr V from 53218-52721, reverse complement, Verified ORF, Protein component of the large (60S) ribosomal subunit, nearly identical to Rpl12Bp; rpl12a rpl12b double mutant exhibits slow growth and slow translation; has sim	44.3715	38.7798	1.14419
>YOR362C PRE10 SGDID:S000005889, Chr XV from 1018744-1017878, reverse complement, Verified ORF, Alpha 7 subunit of the 20S proteasome	480.43	420.647	1.14212
>YBR286W APE3 SGDID:S000000490, Chr II from 774696-776309, Verified ORF, Vacuolar aminopeptidase Y, processed to mature form by Prb1p	480.43	422.845	1.13619
>YJL069C UTP18 SGDID:S000003605, Chr X from 312701-310917, reverse complement, Verified ORF, Possible U3 snoRNP protein involved in maturation of pre-18S rRNA, based on computational analysis of large-scale protein-protein interaction data	480.43	423.199	1.13524
>YLR150W STM1 SGDID:S000004140, Chr XII from 440468-441289, Verified ORF, Protein that binds G4 quadruplex and purine motif triplex nucleic acid; acts with Cdc13p to maintain telomere structure; interacts with ribosomes and subtelomeric Y DNA; multicopy	37.1714	32.753	1.1349
>YDR170C SEC7 SGDID:S000002577, Chr IV from 802220-796191, reverse complement, Verified ORF, Guanine nucleotide exchange factor (GEF) for ADP ribosylation factors involved in proliferation of the Golgi, intra-Golgi transport and ER-to-Golgi transport; fou	364.277	321.79	1.13203
>YLR180W SAM1 SGDID:S000004170, Chr XII from 515264-516412, Verified ORF, S-adenosylmethionine synthetase, catalyzes transfer of the adenosyl group of ATP to the sulfur atom of methionine; one of two differentially regulated isozymes (Sam1p and Sam2p);>Y	334.603	296.077	1.13012
>YMR307W GAS1 SGDID:S000004924, Chr XIII from 887002-888681, Verified ORF, Beta-1,3-glucanosyltransferase, required for cell wall assembly; localizes to the cell surface via a glycosylphosphatidylinositol (GPI) anchor	480.43	425.265	1.12972
>YIL021W RPB3 SGDID:S000001283, Chr IX from 312903-313859, Verified ORF, RNA polymerase II third largest subunit B44, part of central core; similar to prokaryotic alpha subunit	214.224	189.826	1.12853
>YKR059W TIF1 SGDID:S000001767, Chr XI from 554629-555816, Verified ORF, Translation initiation factor eIF4A, identical to Tif2p; DEA(D/H)-box RNA helicase that couples ATPase activity to RNA binding and unwinding; forms a dumbbell structure of two compac	234.471	208.015	1.12718
>YEL031W SPF1 SGDID:S000000757, Chr V from 90258-93905, Verified ORF, P-type ATPase, ion transporter of the ER membrane involved in ER function and Ca2+ homeostasis; required for regulating Hmg2p degradation; confers sensitivity to a killer toxin (SMKT) p	480.43	426.659	1.12603
>YIL052C RPL34B SGDID:S000001314, Chr IX from 257061-257025,256552-256224, reverse complement, Verified ORF, Protein component of the large (60S) ribosomal subunit, nearly identical to Rpl34Ap and has similarity to rat L34 ribosomal protein;>YER056C-A RP	107.621	95.6101	1.12563
>YIL125W KGD1 SGDID:S000001387, Chr IX from 122689-125733, Verified ORF, Component of the mitochondrial alpha-ketoglutarate dehydrogenase complex, which catalyzes a key step in the tricarboxylic acid (TCA) cycle, the oxidative decarboxylation of alpha-ket	367.987	327.657	1.12308
>YDR087C RRP1 SGDID:S000002494, Chr IV from 618304-617468, reverse complement, Verified ORF, Essential evolutionarily conserved nucleolar protein necessary for biogenesis of 60S ribosomal subunits and processing of pre-rRNAs to mature rRNAs, associated wi	480.43	427.931	1.12268
>YLR441C RPS1A SGDID:S000004433, Chr XII from 1018905-1018138, reverse complement, Verified ORF, Ribosomal protein 10 (rp10) of the small (40S) subunit; nearly identical to Rps1Bp and has similarity to rat S3a ribosomal protein	53.2654	47.5823	1.11944
>YPL231W FAS2 SGDID:S000006152, Chr XVI from 108652-114315, Verified ORF, Alpha subunit of fatty acid synthetase, which catalyzes the synthesis of long-chain saturated fatty acids; contains beta-ketoacyl reductase and beta-ketoacyl synthase activities; ph	20.8378	18.6314	1.11842
>YNL112W DBP2 SGDID:S000005056, Chr XIV from 413641-414913,415916-416283, Verified ORF, Essential ATP-dependent RNA helicase of the DEAD-box protein family, involved in nonsense-mediated mRNA decay and rRNA processing	221.732	198.299	1.11817
>YGL202W ARO8 SGDID:S000003170, Chr VII from 116063-117565, Verified ORF, Aromatic aminotransferase I, expression is regulated by general control of amino acid biosynthesis	480.43	431.079	1.11448
>YNL016W PUB1 SGDID:S000004961, Chr XIV from 602908-604269, Verified ORF, Poly(A)+ RNA-binding protein, abundant mRNP-component protein that binds mRNA and is required for stability of a number of mRNAs; not reported to associate with polyribosomes	480.43	431.499	1.1134
>YMR049C ERB1 SGDID:S000004652, Chr XIII from 370516-368093, reverse complement, Verified ORF, Protein required for maturation of the 25S and 5.8S ribosomal RNAs; constituent of 66S pre-ribosomal particles; homologous to mammalian Bop1	279.758	251.394	1.11283
>CON_CASA1 SWISS-PROT:P02662 Alpha-S1-casein - Bos taurus (Bovine).;>P02662 SWISS-PROT:P02662 Alpha-S1-casein - Bos taurus (Bovine).	244.575	220.315	1.11012
>YDL058W USO1 SGDID:S000002216, Chr IV from 345665-351037, Verified ORF, Essential protein involved in intracellular protein transport, coiled-coil protein necessary for transport from ER to Golgi; required for assembly of the ER-to-Golgi SNARE complex	325.597	294.527	1.10549
>YOR332W VMA4 SGDID:S000005859, Chr XV from 943653-944354, Verified ORF, Subunit E of the eight-subunit V1 peripheral membrane domain of the vacuolar H+-ATPase (V-ATPase), an electrogenic proton pump found throughout the endomembrane system; required for	163.556	147.976	1.10529
>YPR187W RPO26 SGDID:S000006391, Chr XVI from 911253-911272,911349-911796, Verified ORF, RNA polymerase subunit ABC23, common to RNA polymerases I, II, and III; part of central core; similar to bacterial omega subunit	224.473	203.732	1.10181
>YBR056W YBR056W SGDID:S000000260, Chr II from 347877-349382, Uncharacterized ORF, Putative cytoplasmic protein of unknown function	480.43	436.583	1.10043
>YBR171W SEC66 SGDID:S000000375, Chr II from 578359-578979, Verified ORF, Non-essential subunit of Sec63 complex (Sec63p, Sec62p, Sec66p and Sec72p); with Sec61 complex, Kar2p/BiP and Lhs1p forms a channel competent for SRP-dependent and post-translationa	480.43	436.897	1.09964
>YJR123W RPS5 SGDID:S000003884, Chr X from 651892-652569, Verified ORF, Protein component of the small (40S) ribosomal subunit, the least basic of the non-acidic ribosomal proteins; phosphorylated in vivo; essential for viability; has similarity to E. col	119.739	108.897	1.09957
>YEL055C POL5 SGDID:S000000781, Chr V from 51539-48471, reverse complement, Verified ORF, DNA Polymerase phi; has sequence similarity to the human MybBP1A and weak sequence similarity to B-type DNA polymerases, not required for chromosomal DNA replication	480.43	437.027	1.09931
>YHR143W-A RPC10 SGDID:S000001185, Chr VIII from 387236-387448, Verified ORF, RNA polymerase subunit, found in RNA polymerase complexes I, II, and III	181.601	165.22	1.09915
>YIL142W CCT2 SGDID:S000001404, Chr IX from 83302-84885, Verified ORF, Subunit beta of the cytosolic chaperonin Cct ring complex, related to Tcp1p, required for the assembly of actin and tubulins in vivo	266.264	242.466	1.09815
>YNL002C RLP7 SGDID:S000004947, Chr XIV from 627144-626176, reverse complement, Verified ORF, Nucleolar protein with similarity to large ribosomal subunit L7 proteins; constituent of 66S pre-ribosomal particles; plays an essential role in processing of pr	337.656	307.721	1.09728
>YGR285C ZUO1 SGDID:S000003517, Chr VII from 1063160-1061859, reverse complement, Verified ORF, Cytosolic ribosome-associated chaperone that acts, together with Ssz1p and the Ssb proteins, as a chaperone for nascent polypeptide chains; contains a DnaJ dom	480.43	440.293	1.09116
>YGL147C RPL9A SGDID:S000003115, Chr VII from 228334-227759, reverse complement, Verified ORF, Protein component of the large (60S) ribosomal subunit, nearly identical to Rpl9Bp and has similarity to E. coli L6 and rat L9 ribosomal proteins	99.0537	90.8069	1.09082
>YBL032W HEK2 SGDID:S000000128, Chr II from 160187-161332, Verified ORF, RNA binding protein with similarity to hnRNP-K that localizes to the cytoplasm and to subtelomeric DNA; required for the proper localization of ASH1 mRNA; involved in the regulation	480.43	440.533	1.09057
>YDL198C GGC1 SGDID:S000002357, Chr IV from 104552-103650, reverse complement, Verified ORF, Mitochondrial GTP/GDP transporter, essential for mitochondrial genome maintenance; has a role in mitochondrial iron transport; member of the mitochondrial carrier	480.43	440.551	1.09052
>YPL137C GIP3 SGDID:S000006058, Chr XVI from 296646-292816, reverse complement, Verified ORF, Glc7-interacting protein whose overexpression relocalizes Glc7p from the nucleus and prevents chromosome segregation; may interact with ribosomes, based on co-pu	480.43	441.188	1.08895
>YKR026C GCN3 SGDID:S000001734, Chr XI from 489298-488381, reverse complement, Verified ORF, Alpha subunit of the translation initiation factor eIF2B, the guanine-nucleotide exchange factor for eIF2; activity subsequently regulated by phosphorylated eIF2;	480.43	442.058	1.0868
>YKL021C MAK11 SGDID:S000001504, Chr XI from 398393-396987, reverse complement, Verified ORF, Protein involved in an early, nucleolar step of 60S ribosomal subunit biogenesis; essential for cell growth and replication of killer M1 dsRNA virus; contains fo	480.43	443.087	1.08428
>YMR143W RPS16A SGDID:S000004751, Chr XIII from 551927-551950,552495-552902, Verified ORF, Protein component of the small (40S) ribosomal subunit; identical to Rps16Bp and has similarity to E. coli S9 and rat S16 ribosomal proteins;>YDL083C RPS16B SGDID:	93.2259	86.0875	1.08292
>YPL235W RVB2 SGDID:S000006156, Chr XVI from 103232-104647, Verified ORF, Essential protein involved in transcription regulation; component of chromatin remodeling complexes; required for assembly and function of the INO80 complex; member of the RUVB-like	271.242	251.034	1.0805
>YOL091W SPO21 SGDID:S000005451, Chr XV from 145334-147163, Verified ORF, Component of the meiotic outer plaque of the spindle pole body, involved in modifying the meiotic outer plaque that is required prior to prospore membrane formation	480.43	444.756	1.08021
>YNL178W RPS3 SGDID:S000005122, Chr XIV from 302682-303404, Verified ORF, Protein component of the small (40S) ribosomal subunit, has apurinic/apyrimidinic (AP) endonuclease activity; essential for viability; has similarity to E. coli S3 and rat S3 riboso	53.9397	50.0392	1.07795
>YDL193W NUS1 SGDID:S000002352, Chr IV from 114673-115800, Verified ORF, Prenyltransferase, required for cell viability; involved in protein trafficking	480.43	445.905	1.07743
>YHR089C GAR1 SGDID:S000001131, Chr VIII from 283300-282683, reverse complement, Verified ORF, Protein component of the H/ACA snoRNP pseudouridylase complex, involved in the modification and cleavage of the 18S pre-rRNA	259.412	240.771	1.07742
>YOL139C CDC33 SGDID:S000005499, Chr XV from 61024-60383, reverse complement, Verified ORF, Cytoplasmic mRNA cap binding protein; the eIF4E-cap complex is responsible for mediating cap-dependent mRNA translation via interactions with the translation initi	291.892	270.918	1.07742
>YBR025C OLA1 SGDID:S000000229, Chr II from 291865-290681, reverse complement, Verified ORF, P-loop ATPase with similarity to human OLA1 and bacterial YchF; identified as specifically interacting with the proteasome; protein levels are induced by hydrogen	480.43	446.395	1.07624
>YLR249W YEF3 SGDID:S000004239, Chr XII from 636782-639916, Verified ORF, Translational elongation factor 3, stimulates the binding of aminoacyl-tRNA (AA-tRNA) to ribosomes by releasing EF-1 alpha from the ribosomal complex; contains two ABC cassettes; bi	193.59	180.4	1.07311
>YER118C SHO1 SGDID:S000000920, Chr V from 399051-397948, reverse complement, Verified ORF, Transmembrane osmosensor, participates in activation of both the Cdc42p- and MAP kinase-dependent filamentous growth pathway and the high-osmolarity glycerol respo	480.43	448.664	1.0708
>YKL090W CUE2 SGDID:S000001573, Chr XI from 271522-272853, Verified ORF, Protein of unknown function; has two CUE domains that bind ubiquitin, which may facilitate intramolecular monoubiquitination	480.43	449.338	1.0692
>YPR137W RRP9 SGDID:S000006341, Chr XVI from 802355-804076, Verified ORF, Protein involved in pre-rRNA processing, associated with U3 snRNP; component of small ribosomal subunit (SSU) processosome; ortholog of the human U3-55k protein	480.43	449.757	1.0682
>YER094C PUP3 SGDID:S000000896, Chr V from 349342-348725, reverse complement, Verified ORF, Beta 3 subunit of the 20S proteasome involved in ubiquitin-dependent catabolism; human homolog is subunit C10	295.974	277.613	1.06614
>YHR197W RIX1 SGDID:S000001240, Chr VIII from 493896-496187, Verified ORF, Essential component of the Rix1 complex (Rix1p, Ipi1p, Ipi3p) that is required for processing of ITS2 sequences from 35S pre-rRNA; Rix1 complex associates with Mdn1p in pre-60S rib	480.43	451.615	1.06381
>YPL043W NOP4 SGDID:S000005964, Chr XVI from 469936-471993, Verified ORF, Nucleolar protein, essential for processing and maturation of 27S pre-rRNA and large ribosomal subunit biogenesis; constituent of 66S pre-ribosomal particles; contains four RNA reco	480.43	454.588	1.05685
>YOL027C MDM38 SGDID:S000005387, Chr XV from 273725-272004, reverse complement, Verified ORF, Mitochondrial inner membrane protein, involved in membrane integration of a subset of mitochondrial proteins; required for K+/H+ exchange; associates with mitoch	480.43	454.628	1.05676
>YDL014W NOP1 SGDID:S000002172, Chr IV from 427362-428345, Verified ORF, Nucleolar protein, component of the small subunit processome complex, which is required for processing of pre-18S rRNA; has similarity to mammalian fibrillarin	122.069	115.526	1.05664
>YMR314W PRE5 SGDID:S000004931, Chr XIII from 901708-902412, Verified ORF, Alpha 6 subunit of the 20S proteasome	304.406	288.406	1.05548
>YOR063W RPL3 SGDID:S000005589, Chr XV from 444688-445851, Verified ORF, Protein component of the large (60S) ribosomal subunit, has similarity to E. coli L3 and rat L3 ribosomal proteins; involved in the replication and maintenance of killer double stran	29.2199	27.7113	1.05444
>YLR355C ILV5 SGDID:S000004347, Chr XII from 839252-838065, reverse complement, Verified ORF, Acetohydroxyacid reductoisomerase, mitochondrial protein involved in branched-chain amino acid biosynthesis, also required for maintenance of wild-type mitochond	340.485	323.041	1.054
>YDR025W RPS11A SGDID:S000002432, Chr IV from 491513-491557,491897-492322, Verified ORF, Protein component of the small (40S) ribosomal subunit; identical to Rps11Bp and has similarity to E. coli S17 and rat S11 ribosomal proteins;>YBR048W RPS11B SGDID:S	58.1777	55.2288	1.0534
>YKL081W TEF4 SGDID:S000001564, Chr XI from 282535-282739,283066-284099, Verified ORF, Translation elongation factor EF-1 gamma	351.838	334.072	1.05318
>YDR190C RVB1 SGDID:S000002598, Chr IV from 841993-840602, reverse complement, Verified ORF, Essential protein involved in transcription regulation; component of chromatin remodeling complexes; required for assembly and function of the INO80 complex; memb	239.447	227.543	1.05231
>YEL026W SNU13 SGDID:S000000752, Chr V from 101943-102323, Verified ORF, RNA binding protein, part of U3 snoRNP involved in rRNA processing, part of U4/U6-U5 tri-snRNP involved in mRNA splicing, similar to human 15.5K protein	119.457	113.703	1.0506
>YBL045C COR1 SGDID:S000000141, Chr II from 135519-134146, reverse complement, Verified ORF, Core subunit of the ubiquinol-cytochrome c reductase complex (bc1 complex), which is a component of the mitochondrial inner membrane electron transport chain	98.619	94.1467	1.0475
>YGL106W MLC1 SGDID:S000003074, Chr VII from 306563-307012, Verified ORF, Essential light chain for Myo1p, light chain for Myo2p; stabilizes Myo2p by binding to the neck region; interacts with Myo1p, Iqg1p, and Myo2p to coordinate formation and contractio	297.896	284.511	1.04705
>YER091C MET6 SGDID:S000000893, Chr V from 342163-339860, reverse complement, Verified ORF, Cobalamin-independent methionine synthase, involved in amino acid biosynthesis; requires a minimum of two glutamates on the methyltetrahydrofolate substrate, simil	282.297	270.206	1.04475
>YHL033C RPL8A SGDID:S000001025, Chr VIII from 36023-35253, reverse complement, Verified ORF, Ribosomal protein L4 of the large (60S) ribosomal subunit, nearly identical to Rpl8Bp and has similarity to rat L7a ribosomal protein; mutation results in decrea	54.9321	52.7296	1.04177
>YGR254W ENO1 SGDID:S000003486, Chr VII from 1000932-1002245, Verified ORF, Enolase I, a phosphopyruvate hydratase that catalyzes the conversion of 2-phosphoglycerate to phosphoenolpyruvate during glycolysis and the reverse reaction during gluconeogenesis	225.071	216.324	1.04044
>YGR094W VAS1 SGDID:S000003326, Chr VII from 672190-675504, Verified ORF, Mitochondrial and cytoplasmic valyl-tRNA synthetase	480.43	461.856	1.04022
>YGL008C PMA1 SGDID:S000002976, Chr VII from 482671-479915, reverse complement, Verified ORF, Plasma membrane H+-ATPase, pumps protons out of the cell; major regulator of cytoplasmic pH and plasma membrane potential; part of the P2 subgroup of cation-tran	50.6754	48.7453	1.03959
>YDR129C SAC6 SGDID:S000002536, Chr IV from 715377-715357,715245-713338, reverse complement, Verified ORF, Fimbrin, actin-bundling protein; cooperates with Scp1p (calponin/transgelin) in the organization and maintenance of the actin cytoskeleton	480.43	462.175	1.0395
>YML024W RPS17A SGDID:S000004486, Chr XIII from 225889-225891,226290-226697, Verified ORF, Ribosomal protein 51 (rp51) of the small (40s) subunit; nearly identical to Rps17Bp and has similarity to rat S17 ribosomal protein;>YDR447C RPS17B SGDID:S00000285	24.7447	23.8275	1.0385
>YLR129W DIP2 SGDID:S000004119, Chr XII from 399658-402489, Verified ORF, Nucleolar protein, specifically associated with the U3 snoRNA, part of the large ribonucleoprotein complex known as the small subunit (SSU) processome, required for 18S rRNA biogene	480.43	462.726	1.03826
>YJL008C CCT8 SGDID:S000003545, Chr X from 421657-419951, reverse complement, Verified ORF, Subunit of the cytosolic chaperonin Cct ring complex, related to Tcp1p, required for the assembly of actin and tubulins in vivo	142.567	137.385	1.03772
>YOR007C SGT2 SGDID:S000005533, Chr XV from 339979-338939, reverse complement, Verified ORF, Glutamine-rich cytoplasmic protein of unknown function; contains tetratricopeptide (TPR) repeats, which often mediate protein-protein interactions; has similarity	330.84	319.347	1.03599
>YGR159C NSR1 SGDID:S000003391, Chr VII from 807661-806417, reverse complement, Verified ORF, Nucleolar protein that binds nuclear localization sequences, required for pre-rRNA processing and ribosome biogenesis	110.749	106.942	1.0356
>YOR195W SLK19 SGDID:S000005721, Chr XV from 712867-715332, Verified ORF, Kinetochore-associated protein required for normal segregation of chromosomes in meiosis and mitosis; component of the FEAR regulatory network, which promotes Cdc14p release from th	480.43	465.217	1.0327
>YCL011C GBP2 SGDID:S000000517, Chr III from 103358-102075, reverse complement, Verified ORF, Poly(A+) RNA-binding protein, involved in the export of mRNAs from the nucleus to the cytoplasm; similar to Hrb1p and Npl3p; also binds single-stranded telomeric	480.43	465.672	1.03169
>YHR034C PIH1 SGDID:S000001076, Chr VIII from 177992-176958, reverse complement, Verified ORF, Protein of unresolved function; may function in protein folding and/or rRNA processing, interacts with a chaperone (Hsp82p), two chromatin remodeling factors (R	480.43	465.672	1.03169
>P20930 SWISS-PROT:P20930 Tax_Id=9606 Gene_Symbol=FLG Filaggrin	480.43	465.748	1.03152
>YGL207W SPT16 SGDID:S000003175, Chr VII from 98973-102080, Verified ORF, Subunit of the heterodimeric FACT complex (Spt16p-Pob3p), facilitates RNA Polymerase II transcription elongation through nucleosomes by destabilizing and then reassembling nucleosom	480.43	466.314	1.03027
>YIL109C SEC24 SGDID:S000001371, Chr IX from 160162-157382, reverse complement, Verified ORF, Component of the Sec23p-Sec24p heterodimeric complex of the COPII vesicle coat; involved in ER to Golgi transport, cargo selection and autophagy; required for th	480.43	466.643	1.02954
>YDL140C RPO21 SGDID:S000002299, Chr IV from 210562-205361, reverse complement, Verified ORF, RNA polymerase II largest subunit B220, part of central core; phosphorylation of C-terminal heptapeptide repeat domain regulates association with transcription a	71.1293	69.1055	1.02929
>YNL085W MKT1 SGDID:S000005029, Chr XIV from 467133-469625, Verified ORF, Protein that forms a complex with Pbp1p that may mediate posttranscriptional regulation of HO endonuclease; involved in propagation of M2 dsRNA satellite of L-A virus; contains a DT	480.43	467.236	1.02824
>YFR051C RET2 SGDID:S000001947, Chr VI from 251790-250150, reverse complement, Verified ORF, Delta subunit of the coatomer complex (COPI), which coats Golgi-derived transport vesicles; involved in retrograde transport between Golgi and ER	480.43	468.79	1.02483
>YGL253W HXK2 SGDID:S000003222, Chr VII from 23935-25395, Verified ORF, Hexokinase isoenzyme 2 that catalyzes phosphorylation of glucose in the cytosol; predominant hexokinase during growth on glucose; functions in the nucleus to repress expression of HXK	319.815	312.125	1.02464
>YGL009C LEU1 SGDID:S000002977, Chr VII from 478657-476318, reverse complement, Verified ORF, Isopropylmalate isomerase, catalyzes the second step in the leucine biosynthesis pathway	480.43	468.962	1.02445
>YNL287W SEC21 SGDID:S000005231, Chr XIV from 91994-94801, Verified ORF, Gamma subunit of coatomer, a heptameric protein complex that together with Arf1p forms the COPI coat; involved in ER to Golgi transport of selective cargo	376.009	367.155	1.02411
>YJR116W YJR116W SGDID:S000003877, Chr X from 640816-641655, Uncharacterized ORF, Putative protein of unknown function	351.543	343.98	1.02199
>YDR224C HTB1 SGDID:S000002632, Chr IV from 914709-914314, reverse complement, Verified ORF, One of two nearly identical (see HTB2) histone H2B subtypes required for chromatin assembly and chromosome function; Rad6p-Bre1p-Lge1p mediated ubiquitination reg	206.466	202.102	1.02159
>YLR409C UTP21 SGDID:S000004401, Chr XII from 937231-934412, reverse complement, Verified ORF, Possible U3 snoRNP protein involved in maturation of pre-18S rRNA, based on computational analysis of large-scale protein-protein interaction data	480.43	470.292	1.02156
>YLR449W FPR4 SGDID:S000004441, Chr XII from 1030830-1032008, Verified ORF, Peptidyl-prolyl cis-trans isomerase (PPIase) (proline isomerase) localized to the nucleus; catalyzes isomerization of proline residues in histones H3 and H4, which affects lysine	340.03	332.987	1.02115
>YIL053W RHR2 SGDID:S000001315, Chr IX from 255113-255865, Verified ORF, Constitutively expressed isoform of DL-glycerol-3-phosphatase; involved in glycerol biosynthesis, induced in response to both anaerobic and, along with the Hor2p/Gpp2p isoform, osmot	278.245	272.838	1.01982
>YNL308C KRI1 SGDID:S000005252, Chr XIV from 55896-54121, reverse complement, Verified ORF, Essential nucleolar protein required for 40S ribosome biogenesis; physically and functionally interacts with Krr1p	480.43	471.187	1.01962
>YDR324C UTP4 SGDID:S000002732, Chr IV from 1116761-1114431, reverse complement, Verified ORF, Nucleolar protein, component of the small subunit (SSU) processome containing the U3 snoRNA that is involved in processing of pre-18S rRNA	480.43	472.716	1.01632
>YGR281W YOR1 SGDID:S000003513, Chr VII from 1052831-1057264, Verified ORF, Plasma membrane ATP-binding cassette (ABC) transporter, multidrug transporter mediates export of many different organic anions including oligomycin	480.43	472.716	1.01632
>YIL133C RPL16A SGDID:S000001395, Chr IX from 99416-99386,99095-98527, reverse complement, Verified ORF, N-terminally acetylated protein component of the large (60S) ribosomal subunit, binds to 5.8 S rRNA; has similarity to Rpl16Bp, E. coli L13 and rat L1	108.362	106.883	1.01384
>YBR086C IST2 SGDID:S000000290, Chr II from 423035-420195, reverse complement, Verified ORF, Plasma membrane protein that may be involved in osmotolerance, localizes to the mother cell in small-budded cells and to the bud in medium- and large-budded cells	402	397.814	1.01052
>YGR091W PRP31 SGDID:S000003323, Chr VII from 666345-667829, Verified ORF, Splicing factor, component of the U4/U6-U5 snRNP complex	480.43	476.743	1.00773
>YGR103W NOP7 SGDID:S000003335, Chr VII from 695421-697238, Verified ORF, Nucleolar protein involved in rRNA processing and 60S ribosomal subunit biogenesis; constituent of several different pre-ribosomal particles; required for exit from G<sub>0</sub> an	295.514	294.148	1.00464
>YFL018C LPD1 SGDID:S000001876, Chr VI from 103121-101622, reverse complement, Verified ORF, Dihydrolipoamide dehydrogenase, the lipoamide dehydrogenase component (E3) of the pyruvate dehydrogenase and 2-oxoglutarate dehydrogenase multi-enzyme complexes	247.666	246.53	1.00461
>YPL131W RPL5 SGDID:S000006052, Chr XVI from 303120-304013, Verified ORF, Protein component of the large (60S) ribosomal subunit with similarity to E. coli L18 and rat L5 ribosomal proteins; binds 5S rRNA and is required for 60S subunit assembly	115.167	114.81	1.00311
>YKL054C DEF1 SGDID:S000001537, Chr XI from 338397-336181, reverse complement, Verified ORF, RNAPII degradation factor, forms a complex with Rad26p in chromatin, enables ubiquitination and proteolysis of RNAPII present in an elongation complex; mutant is	21.9184	21.8809	1.00172
>YKR081C RPF2 SGDID:S000001789, Chr XI from 592182-591148, reverse complement, Verified ORF, Essential protein involved in the processing of pre-rRNA and the assembly of the 60S ribosomal subunit; interacts with ribosomal protein L11; localizes predominan	347.364	347.767	0.99884
>YER117W RPL23B SGDID:S000000919, Chr V from 396765-396806,397278-397649, Verified ORF, Protein component of the large (60S) ribosomal subunit, identical to Rpl23Ap and has similarity to E. coli L14 and rat L23 ribosomal proteins;>YBL087C RPL23A SGDID:S0	168.662	168.982	0.998103
>YLR185W RPL37A SGDID:S000004175, Chr XII from 522665-522671,523031-523290, Verified ORF, Protein component of the large (60S) ribosomal subunit, has similarity to Rpl37Bp and to rat L37 ribosomal protein	206.325	206.789	0.997752
>YDR508C GNP1 SGDID:S000002916, Chr IV from 1468437-1466446, reverse complement, Verified ORF, High-affinity glutamine permease, also transports Leu, Ser, Thr, Cys, Met and Asn; expression is fully dependent on Grr1p and modulated by the Ssy1p-Ptr3p-Ssy5p	480.43	481.521	0.997735
>YPL042C SSN3 SGDID:S000005963, Chr XVI from 474704-473037, reverse complement, Verified ORF, Cyclin-dependent protein kinase, component of RNA polymerase II holoenzyme; involved in phosphorylation of the RNA polymerase II C-terminal domain; involved in g	480.43	481.521	0.997735
>YMR100W MUB1 SGDID:S000004706, Chr XIII from 466299-468161, Verified ORF, Protein of unknown function, deletion causes multi-budding phenotype; has similarity to Aspergillus nidulans samB gene	480.43	483.146	0.994378
>YPL160W CDC60 SGDID:S000006081, Chr XVI from 246989-250261, Verified ORF, Cytosolic leucyl tRNA synthetase, ligates leucine to the appropriate tRNA	480.43	483.146	0.994378
>YCR088W ABP1 SGDID:S000000684, Chr III from 265065-266843, Verified ORF, Actin-binding protein of the cortical actin cytoskeleton, important for activation of the Arp2/3 complex that plays a key role actin in cytoskeleton organization	310.769	312.827	0.993422
>YGL011C SCL1 SGDID:S000002979, Chr VII from 475252-474494, reverse complement, Verified ORF, Alpha 1 subunit of the 20S core complex of the 26S proteasome involved in the degradation of ubiquitinated substrates; essential for growth; detected in the mito	308.154	311.133	0.990425
>YHL007C STE20 SGDID:S000000999, Chr VIII from 97933-95114, reverse complement, Verified ORF, Signal transducing kinase of the PAK (p21-activated kinase) family, involved in pheromone response and pseudohyphal/invasive growth pathways, activated by Cdc42p	480.43	485.565	0.989426
>YPL237W SUI3 SGDID:S000006158, Chr XVI from 100496-101353, Verified ORF, Beta subunit of the translation initiation factor eIF2, involved in the identification of the start codon; proposed to be involved in mRNA binding	149.526	151.896	0.984398
>YPR102C RPL11A SGDID:S000006306, Chr XVI from 731746-731222, reverse complement, Verified ORF, Protein component of the large (60S) ribosomal subunit, nearly identical to Rpl11Bp; involved in ribosomal assembly; depletion causes degradation of proteins a	108.242	110.529	0.979303
>YBR031W RPL4A SGDID:S000000235, Chr II from 300166-301254, Verified ORF, N-terminally acetylated protein component of the large (60S) ribosomal subunit, nearly identical to Rpl4Bp and has similarity to E. coli L4 and rat L4 ribosomal proteins	17.468	17.8579	0.978163
>YBR011C IPP1 SGDID:S000000215, Chr II from 257973-257110, reverse complement, Verified ORF, Cytoplasmic inorganic pyrophosphatase (PPase), catalyzes the rapid exchange of oxygens from Pi with water, highly expressed and essential for viability, active-si	220.137	225.644	0.975591
>YDR299W BFR2 SGDID:S000002707, Chr IV from 1059624-1061228, Verified ORF, Essential protein possibly involved in secretion; multicopy suppressor of sensitivity to Brefeldin A	364.699	375.441	0.971388
>YGR162W TIF4631 SGDID:S000003394, Chr VII from 824064-826922, Verified ORF, Translation initiation factor eIF4G, subunit of the mRNA cap-binding protein complex (eIF4F) that also contains eIF4E (Cdc33p); associates with the poly(A)-binding protein Pab1p,	321.948	331.468	0.971279
>YPL198W RPL7B SGDID:S000006119, Chr XVI from 173151-173161,173571-173664,174072-174701, Verified ORF, Protein component of the large (60S) ribosomal subunit, nearly identical to Rpl7Ap and has similarity to E. coli L30 and rat L7 ribosomal proteins; cont	40.5089	41.7204	0.970961
>YAL003W EFB1 SGDID:S000000003, Chr I from 142176-142255,142622-143162, Verified ORF, Translation elongation factor 1 beta; stimulates nucleotide exchange to regenerate EF-1 alpha-GTP for the next elongation cycle; part of the EF-1 complex, which facilita	159.319	164.122	0.970736
>YML073C RPL6A SGDID:S000004538, Chr XIII from 124172-124158,123742-123227, reverse complement, Verified ORF, N-terminally acetylated protein component of the large (60S) ribosomal subunit, has similarity to Rpl6Bp and to rat L6 ribosomal protein; binds t	40.7615	42.0238	0.969961
>YMR173W DDR48 SGDID:S000004784, Chr XIII from 608688-609980, Verified ORF, DNA damage-responsive protein, expression is increased in response to heat-shock stress or treatments that produce DNA lesions; contains multiple repeats of the amino acid sequenc	186.329	192.306	0.968918
>YML063W RPS1B SGDID:S000004528, Chr XIII from 146482-147249, Verified ORF, Ribosomal protein 10 (rp10) of the small (40S) subunit; nearly identical to Rps1Ap and has similarity to rat S3a ribosomal protein	19.1802	19.8099	0.968214
>YDR150W NUM1 SGDID:S000002557, Chr IV from 755626-763872, Verified ORF, Protein required for nuclear migration, localizes to the mother cell cortex and the bud tip; may mediate interactions of dynein and cytoplasmic microtubules with the cell cortex	328.403	339.712	0.966709
>YCR031C RPS14A SGDID:S000000627, Chr III from 178216-178210,177902-177496, reverse complement, Verified ORF, Ribosomal protein 59 of the small subunit, required for ribosome assembly and 20S pre-rRNA processing; mutations confer cryptopleurine resistance	40.3805	41.8743	0.964326
>YLR367W RPS22B SGDID:S000004359, Chr XII from 856441-856573,857057-857316, Verified ORF, Protein component of the small (40S) ribosomal subunit; nearly identical to Rps22Ap and has similarity to E. coli S8 and rat S15a ribosomal proteins;>YJL190C RPS22A	145.054	150.564	0.963404
>YDL145C COP1 SGDID:S000002304, Chr IV from 198177-194572, reverse complement, Verified ORF, Alpha subunit of COPI vesicle coatomer complex, which surrounds transport vesicles in the early secretory pathway	331.51	344.777	0.96152
>YJR002W MPP10 SGDID:S000003762, Chr X from 438858-440639, Verified ORF, Component of the SSU processome and 90S preribosome, required for pre-18S rRNA processing, interacts with and controls the stability of Imp3p and Imp4p, essential for viability; simi	352.741	367.332	0.960278
>YJR045C SSC1 SGDID:S000003806, Chr X from 521595-519631, reverse complement, Verified ORF, Mitochondrial matrix ATPase, subunit of the presequence translocase-associated protein import motor (PAM) and of SceI endonuclease; involved in protein folding and	94.8165	99.0442	0.957314
>YKR048C NAP1 SGDID:S000001756, Chr XI from 526282-525029, reverse complement, Verified ORF, Protein that interacts with mitotic cyclin Clb2p; required for the regulation of microtubule dynamics during mitosis; controls bud morphogenesis; involved in the	329.658	345.026	0.955459
>YOR341W RPA190 SGDID:S000005868, Chr XV from 960984-965978, Verified ORF, RNA polymerase I subunit; largest subunit of RNA polymerase I	281.156	295.701	0.95081
>YDL208W NHP2 SGDID:S000002367, Chr IV from 87513-87983, Verified ORF, Nuclear protein related to mammalian high mobility group (HMG) proteins, essential for function of H/ACA-type snoRNPs, which are involved in 18S rRNA processing	207.277	219.87	0.942723
>YOR310C NOP58 SGDID:S000005837, Chr XV from 898357-896822, reverse complement, Verified ORF, Protein involved in pre-rRNA processing, 18S rRNA synthesis, and snoRNA synthesis; component of the small subunit processome complex, which is required for proce	127.763	135.729	0.941307
>YGL076C RPL7A SGDID:S000003044, Chr VII from 365999-365989,365529-365436,364967-364338, reverse complement, Verified ORF, Protein component of the large (60S) ribosomal subunit, nearly identical to Rpl7Bp and has similarity to E. coli L30 and rat L7 ribo	72.422	77.5746	0.933579
>YJL189W RPL39 SGDID:S000003725, Chr X from 75932-75937,76324-76473, Verified ORF, Protein component of the large (60S) ribosomal subunit, has similarity to rat L39 ribosomal protein; required for ribosome biogenesis; exhibits genetic interactions with SI	205.833	220.669	0.932768
>YDR101C ARX1 SGDID:S000002508, Chr IV from 657465-655684, reverse complement, Verified ORF, Shuttling pre-60S factor; involved in the biogenesis of ribosomal large subunit biogenesis; interacts directly with Alb1; responsible for Tif6 recycling defects i	227.105	245.13	0.926467
>YMR183C SSO2 SGDID:S000004795, Chr XIII from 627807-626920, reverse complement, Verified ORF, Plasma membrane t-SNARE involved in fusion of secretory vesicles at the plasma membrane; syntaxin homolog that is functionally redundant with Sso1p	355.428	385.178	0.922763
>YJR007W SUI2 SGDID:S000003767, Chr X from 451013-451927, Verified ORF, Alpha subunit of the translation initiation factor eIF2, involved in the identification of the start codon; phosphorylation of Ser51 is required for regulation of translation by inhib	179.78	194.912	0.922365
>YJL014W CCT3 SGDID:S000003551, Chr X from 407552-409156, Verified ORF, Subunit of the cytosolic chaperonin Cct ring complex, related to Tcp1p, required for the assembly of actin and tubulins in vivo	268.728	292.736	0.917987
>YCR084C TUP1 SGDID:S000000680, Chr III from 262449-260308, reverse complement, Verified ORF, General repressor of transcription, forms complex with Cyc8p, involved in the establishment of repressive chromatin structure through interactions with histones	344.809	377.834	0.912592
>YIL018W RPL2B SGDID:S000001280, Chr IX from 316766-316769,317170-317930, Verified ORF, Protein component of the large (60S) ribosomal subunit, identical to Rpl2Ap and has similarity to E. coli L2 and rat L8 ribosomal proteins; expression is upregulated a	38.3712	42.0741	0.911991
>CON_CASB SWISS-PROT:P02666 Beta-casein - Bos taurus (Bovine).;>P02666 SWISS-PROT:P02666 Beta-casein - Bos taurus (Bovine).	254.742	281.56	0.904752
>YML101C CUE4 SGDID:S000004568, Chr XIII from 70088-69735, reverse complement, Verified ORF, Protein of unknown function; has a CUE domain that binds ubiquitin, which may facilitate intramolecular monoubiquitination	171.163	190.084	0.900464
>YOL039W RPP2A SGDID:S000005399, Chr XV from 254296-254616, Verified ORF, Ribosomal protein P2 alpha, a component of the ribosomal stalk, which is involved in the interaction between translational elongation factors and the ribosome; regulates the accumul	19.8128	22.1151	0.895896
>YMR205C PFK2 SGDID:S000004818, Chr XIII from 674765-671886, reverse complement, Verified ORF, Beta subunit of heterooctameric phosphofructokinase involved in glycolysis, indispensable for anaerobic growth, activated by fructose-2,6-bisphosphate and AMP,	117.139	131.119	0.893385
>YFL039C ACT1 SGDID:S000001855, Chr VI from 54695-54686,54377-53260, reverse complement, Verified ORF, Actin, structural protein involved in cell polarization, endocytosis, and other cytoskeletal functions	104.149	116.683	0.89258
>YOL040C RPS15 SGDID:S000005400, Chr XV from 253576-253148, reverse complement, Verified ORF, Protein component of the small (40S) ribosomal subunit; has similarity to E. coli S19 and rat S15 ribosomal proteins	89.8219	100.636	0.892543
>CON_Trypsin SWISS-PROT:P00761 TRYP_PIG Trypsin - Sus scrofa (Pig).;>P00761 SWISS-PROT:P00761|TRYP_PIG Trypsin - Sus scrofa (Pig).	26.9253	30.2206	0.890957
>YDL082W RPL13A SGDID:S000002240, Chr IV from 308424-308427,308793-309388, Verified ORF, Protein component of the large (60S) ribosomal subunit, nearly identical to Rpl13Bp; not essential for viability; has similarity to rat L13 ribosomal protein	117.146	131.629	0.889972
>YGR167W CLC1 SGDID:S000003399, Chr VII from 832461-833162, Verified ORF, Clathrin light chain, subunit of the major coat protein involved in intracellular protein transport and endocytosis; thought to regulate clathrin function; two Clathrin heavy chains	150.146	169.512	0.885757
>YNL055C POR1 SGDID:S000005000, Chr XIV from 518846-517995, reverse complement, Verified ORF, Mitochondrial porin (voltage-dependent anion channel), outer membrane protein required for the maintenance of mitochondrial osmotic stability and mitochondrial m	134.016	151.541	0.884351
>YHR072W-A NOP10 SGDID:S000007455, Chr VIII from 241666-241842, Verified ORF, Constituent of small nucleolar ribonucleoprotein particles containing H/ACA-type snoRNAs, which are required for pseudouridylation and processing of pre-18S rRNA	148.323	167.822	0.88381
>YPL106C SSE1 SGDID:S000006027, Chr XVI from 352272-350191, reverse complement, Verified ORF, ATPase that is a component of the heat shock protein Hsp90 chaperone complex; binds unfolded proteins; member of the heat shock protein 70 (HSP70) family; locali	78.2984	88.7848	0.88189
>YDR363W-A SEM1 SGDID:S000007235, Chr IV from 1202121-1202390, Verified ORF, Component of the lid subcomplex of the regulatory subunit of the 26S proteasome; ortholog of human DSS1	257.426	291.918	0.881845
>YOL109W ZEO1 SGDID:S000005469, Chr XV from 110297-110638, Verified ORF, Peripheral membrane protein of the plasma membrane that interacts with Mid2p; regulates the cell integrity pathway mediated by Pkc1p and Slt2p; the authentic protein is detected in a	161.631	184.305	0.876978
>YDR012W RPL4B SGDID:S000002419, Chr IV from 471851-472939, Verified ORF, Protein component of the large (60S) ribosomal subunit, nearly identical to Rpl4Ap and has similarity to E. coli L4 and rat L4 ribosomal proteins	50.7179	58.4668	0.867465
>YER036C ARB1 SGDID:S000000838, Chr V from 225198-223366, reverse complement, Verified ORF, ATPase of the ATP-binding cassette (ABC) family involved in 40S and 60S ribosome biogenesis, has similarity to Gcn20p; shuttles from nucleus to cytoplasm, physical	391.375	454.343	0.861409
>CON_IPI00554648.3 SWISS-PROT:P05787 Tax_Id=9606 Gene_Symbol=KRT8 Keratin, type II cytoskeletal 8;>P05787 SWISS-PROT:P05787 Tax_Id=9606 Gene_Symbol=KRT8 Keratin, type II cytoskeletal 8;>CON_IPI00787323.2 H-INV:HIT000292931 Tax_Id=9606 Gene_Symbol=- Similar	333.577	388.498	0.858633
>YGR186W TFG1 SGDID:S000003418, Chr VII from 867779-869986, Verified ORF, TFIIF (Transcription Factor II) largest subunit; involved in both transcription initiation and elongation of RNA polymerase II; homologous to human RAP74	398.804	465.411	0.856886
>YFL014W HSP12 SGDID:S000001880, Chr VI from 107250-107579, Verified ORF, Plasma membrane localized protein that protects membranes from desiccation; induced by heat shock, oxidative stress, osmostress, stationary phase entry, glucose depletion, oleate an	295.612	345.36	0.855953
>YNL209W SSB2 SGDID:S000005153, Chr XIV from 252060-253901, Verified ORF, Cytoplasmic ATPase that is a ribosome-associated molecular chaperone, functions with J-protein partner Zuo1p; may be involved in the folding of newly-synthesized polypeptide chains;	11.4471	13.4257	0.852626
>YGR264C MES1 SGDID:S000003496, Chr VII from 1021859-1019604, reverse complement, Verified ORF, Methionyl-tRNA synthetase, forms a complex with glutamyl-tRNA synthetase (Gus1p) and Arc1p, which increases the catalytic efficiency of both tRNA synthetases;	376.756	442.873	0.85071
>YKL008C LAC1 SGDID:S000001491, Chr XI from 428194-426938, reverse complement, Verified ORF, Ceramide synthase component, involved in synthesis of ceramide from C26(acyl)-coenzyme A and dihydrosphingosine or phytosphingosine, functionally equivalent to La	354.433	416.87	0.850226
>YHR039C-A VMA10 SGDID:S000002100, Chr VIII from 187672-187670,187507-187166, reverse complement, Verified ORF, Vacuolar H+ ATPase subunit G of the catalytic (V1) sector, involved in vacuolar acidification	293.132	345.577	0.84824
>YLR354C TAL1 SGDID:S000004346, Chr XII from 837356-836349, reverse complement, Verified ORF, Transaldolase, enzyme in the non-oxidative pentose phosphate pathway; converts sedoheptulose 7-phosphate and glyceraldehyde 3-phosphate to erythrose 4-phosphate	319.399	377.046	0.847109
>YBL047C EDE1 SGDID:S000000143, Chr II from 132043-127898, reverse complement, Verified ORF, Key endocytic protein involved in a network of interactions with other endocytic proteins, binds membranes in a ubiquitin-dependent manner, may also bind ubiquiti	142.666	168.565	0.846357
>YBR143C SUP45 SGDID:S000000347, Chr II from 532176-530863, reverse complement, Verified ORF, Polypeptide release factor involved in translation termination; mutant form acts as a recessive omnipotent suppressor	115.562	136.783	0.844858
>YGR185C TYS1 SGDID:S000003417, Chr VII from 867525-866341, reverse complement, Verified ORF, Cytoplasmic tyrosyl-tRNA synthetase, class I aminoacyl-tRNA synthetase that aminoacylates tRNA(Tyr), required for cytoplasmic protein synthesis, interacts with p	202.346	239.652	0.844333
>YER178W PDA1 SGDID:S000000980, Chr V from 546812-548074, Verified ORF, E1 alpha subunit of the pyruvate dehydrogenase (PDH) complex, catalyzes the direct oxidative decarboxylation of pyruvate to acetyl-CoA; phosphorylated; regulated by glucose	81.6005	96.6518	0.844273
>YDR086C SSS1 SGDID:S000002493, Chr IV from 617168-616926, reverse complement, Verified ORF, Subunit of the Sec61p translocation complex (Sec61p-Sss1p-Sbh1p) that forms a channel for passage of secretory proteins through the endoplasmic reticulum membrane	277.309	330.339	0.839467
>YER177W BMH1 SGDID:S000000979, Chr V from 545606-546409, Verified ORF, 14-3-3 protein, major isoform; controls proteome at post-transcriptional level, binds proteins and DNA, involved in regulation of many processes including exocytosis, vesicle transpor	250.205	300.562	0.832455
>YLR295C ATP14 SGDID:S000004286, Chr XII from 722375-722001, reverse complement, Verified ORF, Subunit h of the F0 sector of mitochondrial F1F0 ATP synthase, which is a large, evolutionarily conserved enzyme complex required for ATP synthesis	297.413	358.37	0.829907
>YOR151C RPB2 SGDID:S000005677, Chr XV from 616672-612998, reverse complement, Verified ORF, RNA polymerase II second largest subunit B150, part of central core; similar to bacterial beta subunit	98.1198	118.283	0.829531
>YGL070C RPB9 SGDID:S000003038, Chr VII from 374830-374462, reverse complement, Verified ORF, RNA polymerase II subunit B12.6; contacts DNA; mutations affect transcription start site; involved in telomere maintenance	194.051	234.033	0.829162
>YMR241W YHM2 SGDID:S000004854, Chr XIII from 751960-752904, Verified ORF, Mitochondrial DNA-binding protein, component of the mitochondrial nucleoid structure, involved in mtDNA replication and segregation of mitochondrial genomes; member of the mitochon	329.561	397.575	0.828928
>YGL099W LSG1 SGDID:S000003067, Chr VII from 314634-316556, Verified ORF, Putative GTPase involved in 60S ribosomal subunit biogenesis; required for the release of Nmd3p from 60S subunits in the cytoplasm	365.422	442.276	0.826231
>YFR004W RPN11 SGDID:S000001900, Chr VI from 153388-154308, Verified ORF, Metalloprotease subunit of the 19S regulatory particle of the 26S proteasome lid; couples the deubiquitination and degradation of proteasome substrates	240.887	291.642	0.825967
>YKL182W FAS1 SGDID:S000001665, Chr XI from 100676-106831, Verified ORF, Beta subunit of fatty acid synthetase, which catalyzes the synthesis of long-chain saturated fatty acids; contains acetyltransacylase, dehydratase, enoyl reductase, malonyl transacyl	28.5916	34.6398	0.825396
>YKL009W MRT4 SGDID:S000001492, Chr XI from 425885-426595, Verified ORF, Protein involved in mRNA turnover and ribosome assembly, localizes to the nucleolus	241.723	293.456	0.823714
>CON_LysC SWISS-PROT:P15636 Protease I precursor Lysyl endopeptidase Achromobacter lyticus.;>P15636 SWISS-PROT:P15636 Protease I precursor Lysyl endopeptidase Achromobacter lyticus.	27.6574	33.5944	0.823274
>YOL081W IRA2 SGDID:S000005441, Chr XV from 171070-180309, Verified ORF, GTPase-activating protein that negatively regulates RAS by converting it from the GTP- to the GDP-bound inactive form, required for reducing cAMP levels under nutrient limiting condi	338.226	413.078	0.818793
>YDR033W MRH1 SGDID:S000002440, Chr IV from 508145-509107, Verified ORF, Protein that localizes primarily to the plasma membrane, also found at the nuclear envelope; the authentic, non-tagged protein is detected in mitochondria in a phosphorylated state;	334.618	410.525	0.815098
>YOR261C RPN8 SGDID:S000005787, Chr XV from 816931-815915, reverse complement, Verified ORF, Essential, non-ATPase regulatory subunit of the 26S proteasome; has similarity to the human p40 proteasomal subunit and to another S. cerevisiae regulatory subuni	336.446	413.122	0.8144
>YHR183W GND1 SGDID:S000001226, Chr VIII from 470960-472429, Verified ORF, 6-phosphogluconate dehydrogenase (decarboxylating), catalyzes an NADPH regenerating reaction in the pentose phosphate pathway; required for growth on D-glucono-delta-lactone and ad	351.821	432.835	0.812829
>YGR135W PRE9 SGDID:S000003367, Chr VII from 761397-762173, Verified ORF, Alpha 3 subunit of the 20S proteasome, the only nonessential 20S subunit; may be replaced by the alpha 4 subunit (Pre6p) under stress conditions to create a more active proteasomal	333.071	409.877	0.812611
>YDL195W SEC31 SGDID:S000002354, Chr IV from 107209-111030, Verified ORF, Essential phosphoprotein component (p150) of the COPII coat of secretory pathway vesicles, in complex with Sec13p; required for ER-derived transport vesicle formation	242.187	298.253	0.812019
>YJL012C VTC4 SGDID:S000003549, Chr X from 413393-411228, reverse complement, Verified ORF, Vacuolar membrane protein involved in vacuolar polyphosphate accumulation; functions as a regulator of vacuolar H+-ATPase activity and vacuolar transporter chapero	368.72	454.243	0.811725
>YPR110C RPC40 SGDID:S000006314, Chr XVI from 746833-745826, reverse complement, Verified ORF, RNA polymerase subunit, common to RNA polymerase I and III	208.61	257.538	0.810015
>YDR050C TPI1 SGDID:S000002457, Chr IV from 556471-555725, reverse complement, Verified ORF, Triose phosphate isomerase, abundant glycolytic enzyme; mRNA half-life is regulated by iron availability; transcription is controlled by activators Reb1p, Gcr1p,	288.788	357.162	0.808563
>YBR205W KTR3 SGDID:S000000409, Chr II from 633617-634831, Verified ORF, Putative alpha-1,2-mannosyltransferase involved in O- and N-linked protein glycosylation; member of the KRE2/MNT1 mannosyltransferase family	257.922	319.159	0.80813
>YER123W YCK3 SGDID:S000000925, Chr V from 404809-406383, Verified ORF, Palmitoylated, vacuolar membrane-localized casein kinase I isoform; negatively regulates vacuole fusion during hypertonic stress via phosphorylation of the HOPS complex subunit, Vps41	319.517	396.013	0.806834
>YGL078C DBP3 SGDID:S000003046, Chr VII from 361862-360291, reverse complement, Verified ORF, Putative ATP-dependent RNA helicase of the DEAD-box family involved in ribosomal biogenesis	354.633	439.545	0.806818
>YPR160W GPH1 SGDID:S000006364, Chr XVI from 861302-864010, Verified ORF, Non-essential glycogen phosphorylase required for the mobilization of glycogen, activity is regulated by cyclic AMP-mediated phosphorylation, expression is regulated by stress-respo	357.23	443.34	0.80577
>YGL173C KEM1 SGDID:S000003141, Chr VII from 180119-175533, reverse complement, Verified ORF, Evolutionarily-conserved 5-3 exonuclease component of cytoplasmic processing (P) bodies involved in mRNA decay; plays a role in microtubule-mediated processes,	291.469	361.916	0.80535
>YNL071W LAT1 SGDID:S000005015, Chr XIV from 491524-492972, Verified ORF, Dihydrolipoamide acetyltransferase component (E2) of pyruvate dehydrogenase complex, which catalyzes the oxidative decarboxylation of pyruvate to acetyl-CoA	129.809	161.498	0.803781
>YDR148C KGD2 SGDID:S000002555, Chr IV from 755064-753673, reverse complement, Verified ORF, Dihydrolipoyl transsuccinylase, component of the mitochondrial alpha-ketoglutarate dehydrogenase complex, which catalyzes the oxidative decarboxylation of alpha-k	302.19	377.69	0.800101
>YLR244C MAP1 SGDID:S000004234, Chr XII from 626333-625170, reverse complement, Verified ORF, Methionine aminopeptidase, catalyzes the cotranslational removal of N-terminal methionine from nascent polypeptides; function is partially redundant with that of	343.711	430.366	0.798649
>YMR142C RPL13B SGDID:S000004750, Chr XIII from 551206-551203,550800-550205, reverse complement, Verified ORF, Protein component of the large (60S) ribosomal subunit, nearly identical to Rpl13Ap; not essential for viability; has similarity to rat L13 ribo	58.6955	73.642	0.797038
>YKL116C PRR1 SGDID:S000001599, Chr XI from 222544-220988, reverse complement, Verified ORF, Serine/threonine protein kinase that inhibits pheromone induced signalling downstream of MAPK, possibly at the level of the Ste12p transcription factor	345.285	433.827	0.795905
>YJR063W RPA12 SGDID:S000003824, Chr X from 555188-555565, Verified ORF, RNA polymerase I subunit A12.2; contains two zinc binding domains, and the N terminal domain is responsible for anchoring to the RNA pol I complex	259.223	325.73	0.795822
>YDL191W RPL35A SGDID:S000002350, Chr IV from 117665-117667,118159-118518, Verified ORF, Protein component of the large (60S) ribosomal subunit, identical to Rpl35Bp and has similarity to rat L35 ribosomal protein;>YDL136W RPL35B SGDID:S000002295, Chr IV	49.1282	61.7975	0.794988
>YML092C PRE8 SGDID:S000004557, Chr XIII from 86739-85987, reverse complement, Verified ORF, Alpha 2 subunit of the 20S proteasome	327.346	412.751	0.793084
>YCR043C YCR043C SGDID:S000000639, Chr III from 206640-206257, reverse complement, Uncharacterized ORF, Putative protein of unknown function; green fluorescent protein (GFP)-fusion protein localizes to the Golgi apparatus; YCR043C is not an essential gene	271.766	344.229	0.789493
>YLR340W RPP0 SGDID:S000004332, Chr XII from 805887-806825, Verified ORF, Conserved ribosomal protein P0 similar to rat P0, human P0, and E. coli L10e; shown to be phosphorylated on serine 302	47.5991	60.3952	0.788127
>YNL131W TOM22 SGDID:S000005075, Chr XIV from 378769-379227, Verified ORF, Component of the TOM (translocase of outer membrane) complex responsible for initial import of mitochondrially directed proteins; acts as a receptor for precursor proteins and medi	270.096	342.92	0.787636
>YJR075W HOC1 SGDID:S000003836, Chr X from 573974-575164, Verified ORF, Alpha-1,6-mannosyltransferase involved in cell wall mannan biosynthesis; subunit of a Golgi-localized complex that also contains Anp1p, Mnn9p, Mnn11p, and Mnn10p; identified as a supp	258.249	328.222	0.786812
>YNL312W RFA2 SGDID:S000005256, Chr XIV from 48286-48292,48401-49215, Verified ORF, Subunit of heterotrimeric Replication Protein A (RPA), which is a highly conserved single-stranded DNA binding protein involved in DNA replication, repair, and recombinati	209.059	266.147	0.785502
>YML072C TCB3 SGDID:S000004537, Chr XIII from 129367-124730, reverse complement, Verified ORF, Lipid-binding protein, localized to the bud via specific mRNA transport; non-tagged protein detected in a phosphorylated state in mitochondria; GFP-fusion prote	332.168	423.545	0.784258
>CON_CASA2 SWISS-PROT:P02663 Alpha-S2-casein [Contains: Casocidin-1 - Bos taurus (Bovine).;>P02663 SWISS-PROT:P02663 Alpha-S2-casein [Contains: Casocidin-1 - Bos taurus (Bovine).	320.475	408.819	0.783904
>YPL009C YPL009C SGDID:S000005930, Chr XVI from 538933-535817, reverse complement, Verified ORF, Protein of unknown function; may interact with ribosomes, based on co-purification experiments; green fluorescent protein (GFP)-fusion protein localizes to th	361.718	461.636	0.783556
>YBR263W SHM1 SGDID:S000000467, Chr II from 736259-737731, Verified ORF, Mitochondrial serine hydroxymethyltransferase, converts serine to glycine plus 5,10 methylenetetrahydrofolate; involved in generating precursors for purine, pyrimidine, amino acid, a	183.8	235.429	0.780701
>YLR061W RPL22A SGDID:S000004051, Chr XII from 263195-263206,263596-263949, Verified ORF, Protein component of the large (60S) ribosomal subunit, has similarity to Rpl22Bp and to rat L22 ribosomal protein	215.653	276.734	0.779278
>YPL050C MNN9 SGDID:S000005971, Chr XVI from 461963-460776, reverse complement, Verified ORF, Subunit of Golgi mannosyltransferase complex also containing Anp1p, Mnn10p, Mnn11p, and Hoc1p that mediates elongation of the polysaccharide mannan backbone; for	321.396	412.847	0.778486
>YDR481C PHO8 SGDID:S000002889, Chr IV from 1420243-1418543, reverse complement, Verified ORF, Repressible alkaline phosphatase, a glycoprotein localized to the vacuole; regulated by levels of inorganic phosphate and by a system consisting of Pho4p, Pho9p	273.288	351.944	0.776511
>YPR016C TIF6 SGDID:S000006220, Chr XVI from 593066-592329, reverse complement, Verified ORF, Constituent of 66S pre-ribosomal particles, has similarity to human translation initiation factor 6 (eIF6); may be involved in the biogenesis and or stability of	181.094	233.383	0.775952
>YJL001W PRE3 SGDID:S000003538, Chr X from 435157-435221,435338-435920, Verified ORF, Beta 1 subunit of the 20S proteasome, responsible for cleavage after acidic residues in peptides	307.604	396.818	0.775176
>YPL061W ALD6 SGDID:S000005982, Chr XVI from 432585-434087, Verified ORF, Cytosolic aldehyde dehydrogenase, activated by Mg2+ and utilizes NADP+ as the preferred coenzyme; required for conversion of acetaldehyde to acetate; constitutively expressed; locat	142.872	184.404	0.774779
>YDL007W RPT2 SGDID:S000002165, Chr IV from 438045-439358, Verified ORF, One of six ATPases of the 19S regulatory particle of the 26S proteasome involved in the degradation of ubiquitinated substrates; required for normal peptide hydrolysis by the core 20	344.303	444.683	0.774266
>YDL055C PSA1 SGDID:S000002213, Chr IV from 356759-355674, reverse complement, Verified ORF, GDP-mannose pyrophosphorylase (mannose-1-phosphate guanyltransferase), synthesizes GDP-mannose from GTP and mannose-1-phosphate in cell wall biosynthesis; require	225.19	290.945	0.773997
>YGR192C TDH3 SGDID:S000003424, Chr VII from 883815-882817, reverse complement, Verified ORF, Glyceraldehyde-3-phosphate dehydrogenase, isozyme 3, involved in glycolysis and gluconeogenesis; tetramer that catalyzes the reaction of glyceraldehyde-3-phospha	54.9438	71.0478	0.773336
>YEL002C WBP1 SGDID:S000000728, Chr V from 150013-148721, reverse complement, Verified ORF, Beta subunit of the oligosaccharyl transferase (OST) glycoprotein complex; required for N-linked glycosylation of proteins in the endoplasmic reticulum	341.307	442.158	0.771912
>YDL167C NRP1 SGDID:S000002326, Chr IV from 163155-160996, reverse complement, Verified ORF, Protein of unknown function, rich in asparagine residues	261.642	339.023	0.771754
>YDR495C VPS3 SGDID:S000002903, Chr IV from 1441143-1438108, reverse complement, Verified ORF, Component of CORVET tethering complex; cytoplasmic protein required for the sorting and processing of soluble vacuolar proteins, acidification of the vacuolar l	405.966	526.791	0.770638
>YLR075W RPL10 SGDID:S000004065, Chr XII from 282928-283593, Verified ORF, Protein component of the large (60S) ribosomal subunit, responsible for joining the 40S and 60S subunits; regulates translation initiation; has similarity to rat L10 ribosomal prot	84.6619	110.258	0.767852
>YHR179W OYE2 SGDID:S000001222, Chr VIII from 462502-463704, Verified ORF, Widely conserved NADPH oxidoreductase containing flavin mononucleotide (FMN), homologous to Oye3p with slight differences in ligand binding and catalytic properties; may be involve	208.377	271.55	0.76736
>YPR080W TEF1 SGDID:S000006284, Chr XVI from 700592-701968, Verified ORF, Translational elongation factor EF-1 alpha; also encoded by TEF2; functions in the binding reaction of aminoacyl-tRNA (AA-tRNA) to ribosomes;>YBR118W TEF2 SGDID:S000000322, Chr II	22.158	28.881	0.767216
>YDR211W GCD6 SGDID:S000002619, Chr IV from 884725-886863, Verified ORF, Catalytic epsilon subunit of the translation initiation factor eIF2B, the guanine-nucleotide exchange factor for eIF2; activity subsequently regulated by phosphorylated eIF2; first i	279.399	364.174	0.767211
>YMR309C NIP1 SGDID:S000004926, Chr XIII from 895425-892987, reverse complement, Verified ORF, Subunit of the eukaryotic translation initiation factor 3 (eIF3), involved in the assembly of preinitiation complex and start codon selection	360.346	471.187	0.764761
>YGL137W SEC27 SGDID:S000003105, Chr VII from 249874-249891,250092-252743, Verified ORF, Essential beta-coat protein of the COPI coatomer, involved in ER-to-Golgi and Golgi-to-ER transport; contains WD40 domains that mediate cargo selective interactions;	268.256	350.899	0.764483
>YDL073W YDL073W SGDID:S000002231, Chr IV from 326613-329567, Uncharacterized ORF, Putative protein of unknown function; YDL073W is not an essential gene	402	526.791	0.76311
>YHL008C YHL008C SGDID:S000001000, Chr VIII from 94506-92623, reverse complement, Uncharacterized ORF, Putative protein of unknown function, does not appear to be involved in monocarboxylic acid transport; green fluorescent protein (GFP)-fusion protein lo	402	526.791	0.76311
>YKL056C TMA19 SGDID:S000001539, Chr XI from 334559-334056, reverse complement, Verified ORF, Protein that associates with ribosomes; homolog of translationally controlled tumor protein; green fluorescent protein (GFP)-fusion protein localizes to the cyto	272.265	357.043	0.762554
>YFL054C YFL054C SGDID:S000001840, Chr VI from 22787-20847, reverse complement, Uncharacterized ORF, Putative channel-like protein; similar to Fps1p; mediates passive diffusion of glycerol in the presence of ethanol	400.492	526.791	0.760249
>YIR003W YIR003W SGDID:S000001442, Chr IX from 360882-362921, Verified ORF, Protein of unknown function; may interact with ribosomes; GFP-fusion protein colocalizes with Sac1p to the actin cytoskeleton; null mutant displays increased frequency of mitochon	400.492	526.791	0.760249
>YDR382W RPP2B SGDID:S000002790, Chr IV from 1239485-1239817, Verified ORF, Ribosomal protein P2 beta, a component of the ribosomal stalk, which is involved in the interaction between translational elongation factors and the ribosome; regulates the accumu	11.2833	14.8587	0.759373
>YLR048W RPS0B SGDID:S000004038, Chr XII from 242233-242322,242682-243350, Verified ORF, Protein component of the small (40S) ribosomal subunit, nearly identical to Rps0Ap; required for maturation of 18S rRNA along with Rps0Ap; deletion of either RPS0 gen	157.052	206.842	0.759287
>YDR186C YDR186C SGDID:S000002594, Chr IV from 835490-832857, reverse complement, Verified ORF, Putative protein of unknown function; may interact with ribosomes, based on co-purification experiments; green fluorescent protein (GFP)-fusion protein localiz	397.509	526.791	0.754585
>YOL120C RPL18A SGDID:S000005480, Chr XV from 94402-94291,93843-93395, reverse complement, Verified ORF, Protein component of the large (60S) ribosomal subunit, identical to Rpl18Bp and has similarity to rat L18 ribosomal protein; intron of RPL18A pre-mRN	88.0186	116.717	0.754123
>YML056C IMD4 SGDID:S000004520, Chr XIII from 164176-163717,163308-162194, reverse complement, Verified ORF, Inosine monophosphate dehydrogenase, catalyzes the first step of GMP biosynthesis, member of a four-gene family in S. cerevisiae, constitutively e	97.9964	129.948	0.754118
>YKL145W RPT1 SGDID:S000001628, Chr XI from 174218-175621, Verified ORF, One of six ATPases of the 19S regulatory particle of the 26S proteasome involved in the degradation of ubiquitinated substrates; required for optimal CDC20 transcription; interacts w	329.985	439.536	0.750758
>YIL016W SNL1 SGDID:S000001278, Chr IX from 321452-321931, Verified ORF, Protein of unknown function proposed to be involved in nuclear pore complex biogenesis and maintenance as well as protein folding; has similarity to the mammalian BAG-1 protein	276.208	368.012	0.750539
>YHR019C DED81 SGDID:S000001061, Chr VIII from 143551-141887, reverse complement, Verified ORF, Cytosolic asparaginyl-tRNA synthetase, required for protein synthesis, catalyzes the specific attachment of asparagine to its cognate tRNA	184.156	245.592	0.749845
>YPR089W YPR089W SGDID:S000006293, Chr XVI from 713273-715939, Uncharacterized ORF, Protein of unknown function; exhibits genetic interaction with ERG11 and protein-protein interaction with Hsp82p	394.692	526.791	0.749238
>YGR240C PFK1 SGDID:S000003472, Chr VII from 973739-970776, reverse complement, Verified ORF, Alpha subunit of heterooctameric phosphofructokinase involved in glycolysis, indispensable for anaerobic growth, activated by fructose-2,6-bisphosphate and AMP,	132.636	177.829	0.745863
>YDL130W RPP1B SGDID:S000002288, Chr IV from 229906-230019,230321-230527, Verified ORF, Ribosomal protein P1 beta, component of the ribosomal stalk, which is involved in interaction of translational elongation factors with ribosome; accumulation is regula	78.5907	105.821	0.742679
>YOR096W RPS7A SGDID:S000005622, Chr XV from 505795-505938,506340-506768, Verified ORF, Protein component of the small (40S) ribosomal subunit, nearly identical to Rps7Bp; interacts with Kti11p; deletion causes hypersensitivity to zymocin; has similarity	61.8639	83.8023	0.738213
>YER043C SAH1 SGDID:S000000845, Chr V from 237118-235769, reverse complement, Verified ORF, S-adenosyl-L-homocysteine hydrolase, catabolizes S-adenosyl-L-homocysteine which is formed after donation of the activated methyl group of S-adenosyl-L-methionine	251.75	341.779	0.736587
>YMR265C YMR265C SGDID:S000004878, Chr XIII from 797924-796539, reverse complement, Uncharacterized ORF, Putative protein of unknown function	385.84	526.791	0.732434
>YPL168W YPL168W SGDID:S000006089, Chr XVI from 231216-232508, Uncharacterized ORF, Putative protein of unknown function; green fluorescent protein (GFP)-fusion protein localizes to the mitochondrion; expression may be cell cycle-regulated	385.84	526.791	0.732434
>YPL093W NOG1 SGDID:S000006014, Chr XVI from 370975-372918, Verified ORF, Putative GTPase that associates with free 60S ribosomal subunits in the nucleolus and is required for 60S ribosomal subunit biogenesis; constituent of 66S pre-ribosomal particles; m	252.607	345.515	0.731103
>YDR233C RTN1 SGDID:S000002641, Chr IV from 930354-929467, reverse complement, Verified ORF, ER membrane protein that interacts with exocyst subunit Sec6p and with Yip3p; also interacts with Sbh1p; null mutant has an altered (mostly cisternal) ER morpholo	323.087	442.214	0.730612
>YLL026W HSP104 SGDID:S000003949, Chr XII from 88622-91348, Verified ORF, Heat shock protein that cooperates with Ydj1p (Hsp40) and Ssa1p (Hsp70) to refold and reactivate previously denatured, aggregated proteins; responsive to stresses including: heat, e	294.886	404.438	0.729125
>YER165W PAB1 SGDID:S000000967, Chr V from 510368-512101, Verified ORF, Poly(A) binding protein, part of the 3-end RNA-processing complex, mediates interactions between the 5 cap structure and the 3 mRNA poly(A) tail, involved in control of poly(A) tai	46.0416	63.3012	0.727343
>YOR204W DED1 SGDID:S000005730, Chr XV from 722912-724726, Verified ORF, ATP-dependent DEAD (Asp-Glu-Ala-Asp)-box RNA helicase, required for translation initiation of all yeast mRNAs; mutations in human DEAD-box DBY are a frequent cause of male infertilit	69.8307	96.1061	0.726601
>YDR064W RPS13 SGDID:S000002471, Chr IV from 579457-579477,580017-580451, Verified ORF, Protein component of the small (40S) ribosomal subunit; has similarity to E. coli S15 and rat S13 ribosomal proteins	44.3186	61.3446	0.722453
>YDL124W YDL124W SGDID:S000002282, Chr IV from 240259-241197, Verified ORF, NADPH-dependent alpha-keto amide reductase; reduces aromatic alpha-keto amides, aliphatic alpha-keto esters, and aromatic alpha-keto esters; member of the aldo-keto reductase (AKR	304.161	421.396	0.721793
>YLR421C RPN13 SGDID:S000004413, Chr XII from 965557-965087, reverse complement, Verified ORF, Subunit of the 19S regulatory particle of the 26S proteasome lid; acts as a ubiquitin receptor for the proteasome	220.937	307.948	0.71745
>YNL132W KRE33 SGDID:S000005076, Chr XIV from 375323-378493, Verified ORF, Essential protein of unknown function; heterozygous mutant shows haploinsufficiency in K1 killer toxin resistance	376.646	526.791	0.714981
>YBR014C GRX7 SGDID:S000000218, Chr II from 267336-266725, reverse complement, Verified ORF, Cis-golgi localized monothiol glutaredoxin; more similar in activity to dithiol than other monothiol glutaredoxins; involved in the oxidative stress response; doe	292.967	410.855	0.713068
>YGL038C OCH1 SGDID:S000003006, Chr VII from 426810-425368, reverse complement, Verified ORF, Mannosyltransferase of the cis-Golgi apparatus, initiates the polymannose outer chain elongation of N-linked oligosaccharides of glycoproteins	236.621	332.614	0.711398
>YPL240C HSP82 SGDID:S000006161, Chr XVI from 98625-96496, reverse complement, Verified ORF, Hsp90 chaperone required for pheromone signaling and negative regulation of Hsf1p; docks with Tom70p for mitochondrial preprotein delivery; promotes telomerase DN	106.165	149.254	0.711308
>YBR079C RPG1 SGDID:S000000283, Chr II from 398271-395377, reverse complement, Verified ORF, Subunit of the core complex of translation initiation factor 3(eIF3), essential for translation; part of a subcomplex (Prt1p-Rpg1p-Nip1p) that stimulates binding	283.143	398.377	0.710742
>YGL206C CHC1 SGDID:S000003174, Chr VII from 107508-102547, reverse complement, Verified ORF, Clathrin heavy chain, subunit of the major coat protein involved in intracellular protein transport and endocytosis; two heavy chains form the clathrin triskelio	39.8939	56.1596	0.710366
>YOL121C RPS19A SGDID:S000005481, Chr XV from 92850-92831,92440-92026, reverse complement, Verified ORF, Protein component of the small (40S) ribosomal subunit, required for assembly and maturation of pre-40 S particles; mutations in human RPS19 are assoc	48.0027	67.6486	0.709589
>YPR010C RPA135 SGDID:S000006214, Chr XVI from 581193-577582, reverse complement, Verified ORF, RNA polymerase I subunit A135	343.656	485.565	0.707745
>YDR245W MNN10 SGDID:S000002653, Chr IV from 952797-953978, Verified ORF, Subunit of a Golgi mannosyltransferase complex also containing Anp1p, Mnn9p, Mnn11p, and Hoc1p that mediates elongation of the polysaccharide mannan backbone; membrane protein of th	250.665	354.485	0.707124
>YKL156W RPS27A SGDID:S000001639, Chr XI from 158619-158621,158972-159217, Verified ORF, Protein component of the small (40S) ribosomal subunit; nearly identical to Rps27Bp and has similarity to rat S27 ribosomal protein;>YHR021C RPS27B SGDID:S000001063,	226.037	320.588	0.705071
>YDR225W HTA1 SGDID:S000002633, Chr IV from 915527-915925, Verified ORF, One of two nearly identical (see also HTA2) histone H2A subtypes; core histone required for chromatin assembly and chromosome function; DNA damage-dependent phosphorylation by Mec1p	227.879	323.368	0.704705
>YJL111W CCT7 SGDID:S000003647, Chr X from 207873-209525, Verified ORF, Subunit of the cytosolic chaperonin Cct ring complex, related to Tcp1p, required for the assembly of actin and tubulins in vivo	328.422	467.236	0.702903
>CON_00713000.2 ENSEMBL:ENSBTAP00000025008 (Bos taurus) hypothetical protein;>ENSEMBL:ENSBTAP00000025008 (Bos taurus) hypothetical protein	305.272	436.394	0.699534
>YKL150W MCR1 SGDID:S000001633, Chr XI from 166549-167457, Verified ORF, Mitochondrial NADH-cytochrome b5 reductase, involved in ergosterol biosynthesis	364.786	526.791	0.692467
>YKL060C FBA1 SGDID:S000001543, Chr XI from 327131-326052, reverse complement, Verified ORF, Fructose 1,6-bisphosphate aldolase, required for glycolysis and gluconeogenesis; catalyzes conversion of fructose 1,6 bisphosphate to glyceraldehyde-3-P and dihyd	64.6462	93.5389	0.691116
>YER102W RPS8B SGDID:S000000904, Chr V from 363096-363698, Verified ORF, Protein component of the small (40S) ribosomal subunit; identical to Rps8Ap and has similarity to rat S8 ribosomal protein;>YBL072C RPS8A SGDID:S000000168, Chr II from 89123-88521,	69.9844	101.264	0.691109
>YPR074C TKL1 SGDID:S000006278, Chr XVI from 694835-692793, reverse complement, Verified ORF, Transketolase, similar to Tkl2p; catalyzes conversion of xylulose-5-phosphate and ribose-5-phosphate to sedoheptulose-7-phosphate and glyceraldehyde-3-phosphate	302.143	442.823	0.682311
>YPL143W RPL33A SGDID:S000006064, Chr XVI from 282121-282139,282665-282969, Verified ORF, N-terminally acetylated ribosomal protein L37 of the large (60S) ribosomal subunit, nearly identical to Rpl33Bp and has similarity to rat L35a; rpl33a null mutant ex	130.538	191.599	0.681308
>YJR064W CCT5 SGDID:S000003825, Chr X from 555907-557595, Verified ORF, Subunit of the cytosolic chaperonin Cct ring complex, related to Tcp1p, required for the assembly of actin and tubulins in vivo	304.267	447.154	0.680453
>YML028W TSA1 SGDID:S000004490, Chr XIII from 220138-220728, Verified ORF, Thioredoxin peroxidase, acts as both a ribosome-associated and free cytoplasmic antioxidant; self-associates to form a high-molecular weight chaperone complex under oxidative stres	79.568	117.166	0.679102
>YDR120C TRM1 SGDID:S000002527, Chr IV from 693259-691547, reverse complement, Verified ORF, tRNA methyltransferase, localizes to both the nucleus and mitochondrion to produce the modified base N2,N2-dimethylguanosine in tRNAs in both compartments	357.694	526.791	0.679005
>YDL052C SLC1 SGDID:S000002210, Chr IV from 363583-362672, reverse complement, Verified ORF, 1-acyl-sn-gylcerol-3-phosphate acyltransferase, catalyzes the acylation of lysophosphatidic acid to form phosphatidic acid, a key intermediate in lipid metabolism	357.55	526.791	0.678732
>YDL229W SSB1 SGDID:S000002388, Chr IV from 44066-45907, Verified ORF, Cytoplasmic ATPase that is a ribosome-associated molecular chaperone, functions with J-protein partner Zuo1p; may be involved in folding of newly-made polypeptide chains; member of the	23.285	34.4612	0.675689
>YKL152C GPM1 SGDID:S000001635, Chr XI from 164390-163647, reverse complement, Verified ORF, Tetrameric phosphoglycerate mutase, mediates the conversion of 3-phosphoglycerate to 2-phosphoglycerate during glycolysis and the reverse reaction during gluconeo	62.9149	93.6887	0.671531
>YJL183W MNN11 SGDID:S000003719, Chr X from 84066-85334, Verified ORF, Subunit of a Golgi mannosyltransferase complex that also contains Anp1p, Mnn9p, Mnn10p, and Hoc1p, and mediates elongation of the polysaccharide mannan backbone; has homology to Mnn10p	246.829	369.754	0.66755
>YAL005C SSA1 SGDID:S000000004, Chr I from 141433-139505, reverse complement, Verified ORF, ATPase involved in protein folding and nuclear localization signal (NLS)-directed nuclear transport; member of heat shock protein 70 (HSP70) family; forms a chaper	6.19715	9.3217	0.66481
>YMR116C ASC1 SGDID:S000004722, Chr XIII from 500687-500151,499877-499455, reverse complement, Verified ORF, G-protein beta subunit and guanine nucleotide dissociation inhibitor for Gpa2p; ortholog of RACK1 that inhibits translation; core component of the	121.62	184.473	0.659283
>YOR224C RPB8 SGDID:S000005750, Chr XV from 761266-760826, reverse complement, Verified ORF, RNA polymerase subunit ABC14.5, common to RNA polymerases I, II, and III	230.828	350.747	0.658105
>YDL143W CCT4 SGDID:S000002302, Chr IV from 199997-201583, Verified ORF, Subunit of the cytosolic chaperonin Cct ring complex, related to Tcp1p, required for the assembly of actin and tubulins in vivo	346.158	526.791	0.657108
>YOR260W GCD1 SGDID:S000005786, Chr XV from 813984-815720, Verified ORF, Gamma subunit of the translation initiation factor eIF2B, the guanine-nucleotide exchange factor for eIF2; activity subsequently regulated by phosphorylated eIF2; first identified as	105.669	160.903	0.656726
>YOR369C RPS12 SGDID:S000005896, Chr XV from 1028623-1028192, reverse complement, Verified ORF, Protein component of the small (40S) ribosomal subunit; has similarity to rat ribosomal protein S12	85.0717	129.743	0.655693
>YDR099W BMH2 SGDID:S000002506, Chr IV from 653605-654426, Verified ORF, 14-3-3 protein, minor isoform; controls proteome at post-transcriptional level, binds proteins and DNA, involved in regulation of many processes including exocytosis, vesicle transpo	166.915	257.003	0.649466
>YBR078W ECM33 SGDID:S000000282, Chr II from 393118-393175,393506-394854, Verified ORF, GPI-anchored protein of unknown function, has a possible role in apical bud growth; GPI-anchoring on the plasma membrane crucial to function; phosphorylated in mitocho	233.268	362.024	0.644343
>YHR099W TRA1 SGDID:S000001141, Chr VIII from 302764-313998, Verified ORF, Subunit of SAGA and NuA4 histone acetyltransferase complexes; interacts with acidic activators (e.g., Gal4p) which leads to transcription activation; similar to human TRRAP, which	337.678	526.791	0.641008
>YDR432W NPL3 SGDID:S000002840, Chr IV from 1328776-1330020, Verified ORF, RNA-binding protein that carries poly(A)+ mRNA from the nucleus into the cytoplasm; dissociation from mRNAs is promoted by Mtr10p; phosphorylated by Sky1p in the cytoplasm	227.536	356.776	0.637755
>CON_00703268.2 TREMBL:Q3SX28;Q5KR48 (Bos taurus) Tropomyosin 2;>Q3SX28 TREMBL:Q3SX28;Q5KR48 (Bos taurus) Tropomyosin 2	335.731	526.791	0.637314
>YLR432W IMD3 SGDID:S000004424, Chr XII from 1002554-1004125, Verified ORF, Inosine monophosphate dehydrogenase, catalyzes the first step of GMP biosynthesis, member of a four-gene family in S. cerevisiae, constitutively expressed;>YHR216W IMD2 SGDID:S00	35.1612	55.1739	0.637279
>YLR058C SHM2 SGDID:S000004048, Chr XII from 259402-257993, reverse complement, Verified ORF, Cytosolic serine hydroxymethyltransferase, converts serine to glycine plus 5,10 methylenetetrahydrofolate; major isoform involved in generating precursors for pu	210.708	331	0.63658
>YHR081W LRP1 SGDID:S000001123, Chr VIII from 267540-268094, Verified ORF, Substrate-specific nuclear cofactor for exosome activity in the processing of stable RNAs; required for telomere length maintenance; homolog of mammalian nuclear matrix protein C1D	334.534	526.791	0.63504
>YLR372W SUR4 SGDID:S000004364, Chr XII from 867353-868390, Verified ORF, Elongase, involved in fatty acid and sphingolipid biosynthesis; synthesizes very long chain 20-26-carbon fatty acids from C18-CoA primers; involved in regulation of sphingolipid bio	330.663	526.791	0.627692
>YER180C-A SLO1 SGDID:S000028437, Chr V from 551117-550860, reverse complement, Verified ORF, Protein interacting with Arl3p, which is a GTPase of the Ras superfamily involved in vesicle-tethering at the Golgi; putative ortholog of human SCOCO	329.95	526.791	0.62634
>YJR145C RPS4A SGDID:S000003906, Chr X from 703059-703046,702789-702018, reverse complement, Verified ORF, Protein component of the small (40S) ribosomal subunit; mutation affects 20S pre-rRNA processing; identical to Rps4Bp and has similarity to rat S4 r	37.9371	60.7408	0.624574
>YLL024C SSA2 SGDID:S000003947, Chr XII from 97484-95565, reverse complement, Verified ORF, ATP binding protein involved in protein folding and vacuolar import of proteins; member of heat shock protein 70 (HSP70) family; associated with the chaperonin-con	11.8949	19.2087	0.619247
>YLR192C HCR1 SGDID:S000004182, Chr XII from 539591-538794, reverse complement, Verified ORF, Dual function protein involved in translation initiation as a substoichiometric component of eukaryotic translation initiation factor 3 (eIF3) and required for p	325.899	526.791	0.61865
>YLR342W FKS1 SGDID:S000004334, Chr XII from 809997-815627, Verified ORF, Catalytic subunit of 1,3-beta-D-glucan synthase, functionally redundant with alternate catalytic subunit Gsc2p; binds to regulatory subunit Rho1p; involved in cell wall synthesis an	6.3661	10.385	0.61301
>YDR328C SKP1 SGDID:S000002736, Chr IV from 1126014-1125430, reverse complement, Verified ORF, Evolutionarily conserved kinetochore protein that is part of multiple protein complexes, including the SCF ubiquitin ligase complex, the CBF3 complex that binds	321.736	526.791	0.610747
>CON_IPI00847342.1 TREMBL:Q3KNV1;Q96GE1 Tax_Id=9606 Gene_Symbol=KRT7 keratin 7;>CON_IPI00306959.10 SWISS-PROT:P08729 Tax_Id=9606 Gene_Symbol=KRT7 Keratin, type II cytoskeletal 7;>Q3KNV1 TREMBL:Q3KNV1;Q96GE1 Tax_Id=9606 Gene_Symbol=KRT7 keratin 7;>P08729 SW	319.662	526.791	0.606809
>YOL138C YOL138C SGDID:S000005498, Chr XV from 65350-61325, reverse complement, Verified ORF, Putative protein of unknown function; may interact with ribosomes, based on co-purification experiments; null mutation suppresses cdc13-1 temperature sensitivity	318.658	526.791	0.604904
>YDR475C JIP4 SGDID:S000002883, Chr IV from 1410087-1407457, reverse complement, Verified ORF, Protein of unknown function; previously annotated as two separate ORFs, YDR474C and YDR475C, which were merged as a result of corrections to the systematic refe	315.399	526.791	0.598717
>YNL160W YGP1 SGDID:S000005104, Chr XIV from 336547-337611, Verified ORF, Cell wall-related secretory glycoprotein; induced by nutrient deprivation-associated growth arrest and upon entry into stationary phase; may be involved in adaptation prior to stati	161.189	269.557	0.597979
>YJL140W RPB4 SGDID:S000003676, Chr X from 150958-151623, Verified ORF, RNA polymerase II subunit B32; forms two subunit dissociable complex with Rpb7p; involved recruitment of 3-end processing factors to transcribing RNA polymerase II complex and in exp	89.1647	150.687	0.59172
>YAL038W CDC19 SGDID:S000000036, Chr I from 71787-73289, Verified ORF, Pyruvate kinase, functions as a homotetramer in glycolysis to convert phosphoenolpyruvate to pyruvate, the input for aerobic (TCA cycle) or anaerobic (glucose fermentation) respiration	25.8831	43.8504	0.590259
>CON_00009867.3 SWISS-PROT:P13647 Tax_Id=9606 Gene_Symbol=KRT5 Keratin, type II cytoskeletal 5;>P13647 SWISS-PROT:P13647 Tax_Id=9606 Gene_Symbol=KRT5 Keratin, type II cytoskeletal 5;>CON_00124499.2 TREMBL:Q8VED5 Tax_Id=10090 Gene_Symbol=Krt79 Keratin 79;>Q	163.842	277.685	0.590028
>YPL154C PEP4 SGDID:S000006075, Chr XVI from 260930-259713, reverse complement, Verified ORF, Vacuolar aspartyl protease (proteinase A), required for the posttranslational precursor maturation of vacuolar proteinases; important for protein turnover after	246.185	418.553	0.588182
>YNL215W IES2 SGDID:S000005159, Chr XIV from 244469-245431, Verified ORF, Protein that associates with the INO80 chromatin remodeling complex under low-salt conditions	305.134	526.791	0.579232
>YOR293W RPS10A SGDID:S000005819, Chr XV from 867097-867148,867586-867851, Verified ORF, Protein component of the small (40S) ribosomal subunit; nearly identical to Rps10Bp and has similarity to rat ribosomal protein S10;>YMR230W RPS10B SGDID:S000004843,	112.903	195.522	0.577445
>CON_00698900.1 SWISS-PROT:P60712 (Bos taurus) Actin, cytoplasmic 1	4.93242	8.57262	0.57537
>CON_IPI00166205.2 SWISS-PROT:Q8N1N4-2 Tax_Id=9606 Gene_Symbol=KRT78 Isoform 2 of Keratin, type II cytoskeletal 78;>CON_00166205.2 TREMBL:Q7RTT2 Tax_Id=9606 Gene_Symbol=KRT78 Keratin-78;>Q8N1N4-2 SWISS-PROT:Q8N1N4-2 Tax_Id=9606 Gene_Symbol=KRT78 Isoform 2	301.34	526.791	0.572029
>YGR086C PIL1 SGDID:S000003318, Chr VII from 650621-649602, reverse complement, Verified ORF, Primary component of eisosomes, which are large immobile cell cortex structures associated with endocytosis; null mutants show activation of Pkc1p/Ypk1p stress r	60.9106	108.325	0.562294
>YER103W SSA4 SGDID:S000000905, Chr V from 364585-366513, Verified ORF, Heat shock protein that is highly induced upon stress; plays a role in SRP-dependent cotranslational protein-membrane targeting and translocation; member of the HSP70 family; cytoplas	89.5907	159.703	0.560982
>YPR182W SMX3 SGDID:S000006386, Chr XVI from 900190-900450, Verified ORF, Core Sm protein Sm F; part of heteroheptameric complex (with Smb1p, Smd1p, Smd2p, Smd3p, Sme1p, and Smx2p) that is part of the spliceosomal U1, U2, U4, and U5 snRNPs; homolog of hum	293.096	526.791	0.55638
>YKL188C PXA2 SGDID:S000001671, Chr XI from 88791-86230, reverse complement, Verified ORF, Subunit of a heterodimeric peroxisomal ATP-binding cassette transporter complex (Pxa1p-Pxa2p), required for import of long-chain fatty acids into peroxisomes; simil	257.642	464.882	0.55421
>YGL220W FRA2 SGDID:S000003188, Chr VII from 82373-82735, Uncharacterized ORF, Protein involved in negative regulation of transcription of iron regulon; forms an iron independent complex with Fra2p, Grx3p, and Grx4p; null mutant fails to repress iron regu	289.691	526.791	0.549916
>YCL028W RNQ1 SGDID:S000000533, Chr III from 70150-71367, Verified ORF, [PIN(+)] prion, an infectious protein conformation that is generally an ordered protein aggregate	116.048	212.402	0.546359
>YPR132W RPS23B SGDID:S000006336, Chr XVI from 794961-795025,795391-795763, Verified ORF, Ribosomal protein 28 (rp28) of the small (40S) ribosomal subunit, required for translational accuracy; nearly identical to Rps23Ap and similar to E. coli S12 and rat	119.617	220.744	0.541881
>YJR121W ATP2 SGDID:S000003882, Chr X from 647598-649133, Verified ORF, Beta subunit of the F1 sector of mitochondrial F1F0 ATP synthase, which is a large, evolutionarily conserved enzyme complex required for ATP synthesis; phosphorylated	101.788	188.339	0.540454
>YGR231C PHB2 SGDID:S000003463, Chr VII from 953483-952551, reverse complement, Verified ORF, Subunit of the prohibitin complex (Phb1p-Phb2p), a 1.2 MDa ring-shaped inner mitochondrial membrane chaperone that stabilizes newly synthesized proteins; determi	234.517	434.506	0.539733
>YER120W SCS2 SGDID:S000000922, Chr V from 401131-401865, Verified ORF, Integral ER membrane protein that regulates phospholipid metabolism via an interaction with the FFAT motif of Opi1p, also involved in telomeric silencing, disruption causes inositol a	153.6	288.185	0.532989
>YLR275W SMD2 SGDID:S000004265, Chr XII from 694380-694384,694475-694802, Verified ORF, Core Sm protein Sm D2; part of heteroheptameric complex (with Smb1p, Smd1p, Smd3p, Sme1p, Smx3p, and Smx2p) that is part of the spliceosomal U1, U2, U4, and U5 snRNPs;	280.733	526.791	0.532911
>YMR186W HSC82 SGDID:S000004798, Chr XIII from 632354-634471, Verified ORF, Cytoplasmic chaperone of the Hsp90 family, redundant in function and nearly identical with Hsp82p, and together they are essential; expressed constitutively at 10-fold higher basa	43.5593	82.799	0.526085
>YBR221C PDB1 SGDID:S000000425, Chr II from 666248-665148, reverse complement, Verified ORF, E1 beta subunit of the pyruvate dehydrogenase (PDH) complex, which is an evolutionarily-conserved multi-protein complex found in mitochondria	62.3128	120.983	0.515056
>YOL005C RPB11 SGDID:S000005365, Chr XV from 316176-315814, reverse complement, Verified ORF, RNA polymerase II subunit B12.5; part of central core; similar to Rpc19p and bacterial alpha subunit	270.664	526.791	0.513797
>YBL033C RIB1 SGDID:S000000129, Chr II from 159696-158659, reverse complement, Verified ORF, GTP cyclohydrolase II; catalyzes the first step of the riboflavin biosynthesis pathway	268.125	526.791	0.508978
>YGR063C SPT4 SGDID:S000003295, Chr VII from 617828-617520, reverse complement, Verified ORF, Protein that forms a complex with Spt5p and mediates both activation and inhibition of transcription elongation, and plays a role in pre-mRNA processing; in addi	154.582	310.717	0.497501
>YIL051C MMF1 SGDID:S000001313, Chr IX from 258279-257842, reverse complement, Verified ORF, Mitochondrial protein involved in maintenance of the mitochondrial genome	260.158	526.791	0.493855
>CON_LACB SWISS-PROT:P02754 Beta-lactoglobulin - Bos taurus (Bovine).;>P02754 SWISS-PROT:P02754 Beta-lactoglobulin - Bos taurus (Bovine).	260.137	526.791	0.493814
>YOR386W PHR1 SGDID:S000005913, Chr XV from 1066837-1068534, Verified ORF, DNA photolyase involved in photoreactivation, repairs pyrimidine dimers in the presence of visible light; induced by DNA damage; regulated by transcriptional repressor Rph1p	257.249	526.791	0.488333
>YNL113W RPC19 SGDID:S000005057, Chr XIV from 412773-413201, Verified ORF, RNA polymerase subunit, common to RNA polymerases I and III	175.645	364.637	0.481697
>YGL123W RPS2 SGDID:S000003091, Chr VII from 277623-278387, Verified ORF, Protein component of the small (40S) subunit, essential for control of translational accuracy; has similarity to E. coli S5 and rat S2 ribosomal proteins	37.0418	77.3383	0.478958
>YEL060C PRB1 SGDID:S000000786, Chr V from 41953-40046, reverse complement, Verified ORF, Vacuolar proteinase B (yscB), a serine protease of the subtilisin family; involved in protein degradation in the vacuole and required for full protein degradation du	247.597	526.791	0.470009
>CON_00019359.3 SWISS-PROT:P35527 Tax_Id=9606 Gene_Symbol=KRT9 Keratin, type I cytoskeletal 9;>P35527 SWISS-PROT:P35527 Tax_Id=9606 Gene_Symbol=KRT9 Keratin, type I cytoskeletal 9	112.679	242.099	0.465427
>YMR105C PGM2 SGDID:S000004711, Chr XIII from 477605-475896, reverse complement, Verified ORF, Phosphoglucomutase, catalyzes the conversion from glucose-1-phosphate to glucose-6-phosphate, which is a key step in hexose metabolism; functions as the accepto	243.678	526.791	0.46257
>YBR109C CMD1 SGDID:S000000313, Chr II from 458356-457913, reverse complement, Verified ORF, Calmodulin; Ca++ binding protein that regulates Ca++ independent processes (mitosis, bud growth, actin organization, endocytosis, etc.) and Ca++ dependent process	177.524	385.684	0.460283
>YDR182W CDC1 SGDID:S000002590, Chr IV from 827580-829055, Verified ORF, Putative membrane protein of unknown function involved in Mn2+ homeostasis; mutants display actin and general growth defects, heterogeneous cell cycle arrests, and pleiotropic defect	173.724	379.096	0.458257
>YHL034C SBP1 SGDID:S000001026, Chr VIII from 34075-33191, reverse complement, Verified ORF, Putative RNA binding protein; involved in translational repression and found in cytoplasmic P bodies; found associated with small nucleolar RNAs snR10 and snR11	66.8897	146.419	0.456838
>YJL136C RPS21B SGDID:S000003672, Chr X from 157270-157247,156786-156547, reverse complement, Verified ORF, Protein component of the small (40S) ribosomal subunit; nearly identical to Rps21Ap and has similarity to rat S21 ribosomal protein	113.977	249.839	0.456202
>YBL030C PET9 SGDID:S000000126, Chr II from 164000-163044, reverse complement, Verified ORF, Major ADP/ATP carrier of the mitochondrial inner membrane, exchanges cytosolic ADP for mitochondrially synthesized ATP; phosphorylated; required for viability in	239.233	526.791	0.454132
>YDR155C CPR1 SGDID:S000002562, Chr IV from 768998-768510, reverse complement, Verified ORF, Cytoplasmic peptidyl-prolyl cis-trans isomerase (cyclophilin), catalyzes the cis-trans isomerization of peptide bonds N-terminal to proline residues; binds the dr	76.943	171.908	0.447581
>YLR388W RPS29A SGDID:S000004380, Chr XII from 898651-898821, Verified ORF, Protein component of the small (40S) ribosomal subunit; nearly identical to Rps29Bp and has similarity to rat S29 and E. coli S14 ribosomal proteins	77.5646	176.186	0.440242
>YOL097W-A YOL097W-A SGDID:S000028854, Chr XV from 136220-136405, Uncharacterized ORF, Putative protein of unknown function; identified by expression profiling and mass spectrometry	229.611	526.791	0.435867
>YHR064C SSZ1 SGDID:S000001106, Chr VIII from 227143-225527, reverse complement, Verified ORF, Hsp70 protein that interacts with Zuo1p (a DnaJ homolog) to form a ribosome-associated complex that binds the ribosome via the Zuo1p subunit; also involved in p	81.3101	187.412	0.433857
>YLR044C PDC1 SGDID:S000004034, Chr XII from 234082-232391, reverse complement, Verified ORF, Major of three pyruvate decarboxylase isozymes, key enzyme in alcoholic fermentation, decarboxylates pyruvate to acetaldehyde; subject to glucose-, ethanol-, and	33.0303	79.3031	0.416507
>YML026C RPS18B SGDID:S000004488, Chr XIII from 223828-223782,223380-222987, reverse complement, Verified ORF, Protein component of the small (40S) ribosomal subunit; nearly identical to Rps18Ap and has similarity to E. coli S13 and rat S18 ribosomal prot	24.2936	59.8785	0.405714
>CON_00700865.3 ENSEMBL:ENSBTAP00000016242 (Bos taurus) similar to alpha-tubulin I isoform 1	54.4788	153.073	0.355901
>YMR295C YMR295C SGDID:S000004910, Chr XIII from 858889-858296, reverse complement, Verified ORF, Protein of unknown function that associates with ribosomes; green fluorescent protein (GFP)-fusion protein localizes to the cell periphery and bud; YMR295C i	92.4081	269.725	0.342601
>YOR108W LEU9 SGDID:S000005634, Chr XV from 523028-524842, Verified ORF, Alpha-isopropylmalate synthase II (2-isopropylmalate synthase), catalyzes the first step in the leucine biosynthesis pathway; the minor isozyme, responsible for the residual alpha-IP	177.537	526.791	0.337017
>CON_00021304.1 SWISS-PROT:P35908 Tax_Id=9606 Gene_Symbol=KRT2 Keratin, type II cytoskeletal 2 epidermal;>P35908 SWISS-PROT:P35908 Tax_Id=9606 Gene_Symbol=KRT2 Keratin, type II cytoskeletal 2 epidermal	41.9137	150.676	0.278171
>CON_00009865.2 SWISS-PROT:P13645 Tax_Id=9606 Gene_Symbol=KRT10 Keratin, type I cytoskeletal 10;>P13645 SWISS-PROT:P13645 Tax_Id=9606 Gene_Symbol=KRT10 Keratin, type I cytoskeletal 10	18.9686	74.2081	0.255613
>CON_IPI00376379.3 SWISS-PROT:Q7Z794 Tax_Id=9606 Gene_Symbol=KRT77 Keratin 77;>Q7Z794 SWISS-PROT:Q7Z794 Tax_Id=9606 Gene_Symbol=KRT77 Keratin 77	119.982	472.716	0.253815
>CON_00220327.3 SWISS-PROT:P04264 Tax_Id=9606 Gene_Symbol=KRT1 Keratin, type II cytoskeletal 1;>P04264 SWISS-PROT:P04264 Tax_Id=9606 Gene_Symbol=KRT1 Keratin, type II cytoskeletal 1	13.3186	83.072	0.160326
>YDL081C RPP1A SGDID:S000002239, Chr IV from 310122-309802, reverse complement, Verified ORF, Ribosomal stalk protein P1 alpha, involved in the interaction between translational elongation factors and the ribosome; accumulation of P1 in the cytoplasm is r	66.3757	526.791	0.126

## Sheet: Supplementary file 3B_ALL
GG_Peptide id #	Positions within proteins	Protein group IDs	Leading proteins	Leading Gene Name	Fasta headers	Localization prob	Score diff	PEP	Score	Site Score	Least Changed Ratio (tom1D_Bio1)	Least Changed Ratio (tom1D_Bio2)	Least Changed Ratio (tom1D_Bio3)	Geometric Mean of Least Changed Ratios (tom1D/WT)	Least Changed Ratio tom1 (C:A) Mt_Bio1	Least Changed Ratio tom1 (C:A) Mt_Bio2	Geometric Mean of Least Changed Ratio (tom1 (C:A) Mt/WT)
718	126	711	YFL056C	AAD6	>YFL056C AAD6 SGDID:S000001838, Chr VI from 15431-14793, reverse complement, Verified ORF, Putative aryl-alcohol dehydrogenase with similarity to P. chrysosporium aryl-alcohol dehydrogenase, involved in the oxidative stress response;>YNL331C AAD14 SGDID:	1	81.9504	0.0496153	81.95	No known flanking GlyGly site, ratio may be meaningful
719	23	711	YFL056C	AAD6	>YFL056C AAD6 SGDID:S000001838, Chr VI from 15431-14793, reverse complement, Verified ORF, Putative aryl-alcohol dehydrogenase with similarity to P. chrysosporium aryl-alcohol dehydrogenase, involved in the oxidative stress response	1	181.874	7.56719e-05	211.39	No flanking Lys, ratio valid
1618	329	1727	YNL141W	AAH1	>YNL141W AAH1 SGDID:S000005085, Chr XIV from 359598-360641, Verified ORF, Adenine deaminase (adenine aminohydrolase), converts adenine to hypoxanthine; involved in purine salvage; transcriptionally regulated by nutrient levels and growth phase; Aah1p degr	1	94.7673	0.00163758	166.68	No known flanking GlyGly site, ratio may be meaningful	0.537003			0.537003
980	542	963	YHR047C	AAP1	>YHR047C AAP1 SGDID:S000001089, Chr VIII from 201303-198733, reverse complement, Verified ORF, Arginine/alanine aminopeptidase, overproduction stimulates glycogen accumulation	1	85.9764	0.0031809	85.976	No known flanking GlyGly site, ratio may be meaningful
319	269	298	YCR088W	ABP1	>YCR088W ABP1 SGDID:S000000684, Chr III from 265065-266843, Verified ORF, Actin-binding protein of the cortical actin cytoskeleton, important for activation of the Arp2/3 complex that plays a key role actin in cytoskeleton organization	1	97.223	0.00398899	97.223	No known flanking GlyGly site, ratio may be meaningful	1.34763	1.13587		1.23723
1827	343	1947	YOR239W	ABP140	>YOR239W ABP140 SGDID:S000005765, Chr XV from 784858-785688,785690-786745, Verified ORF, Nonessential protein that binds actin filaments and localizes to actin patches and cables, has similarity to S-adenosylmethionine (AdoMet)-dependent methyltransferase	1	67.032	0.0429076	67.032	No flanking Lys, ratio valid	1.76837			1.76837
822	9	833	YGR037C	ACB1	>YGR037C ACB1 SGDID:S000003269, Chr VII from 559998-559735, reverse complement, Verified ORF, Acyl-CoA-binding protein, transports newly synthesized acyl-CoA esters from fatty acid synthetase (Fas1p-Fas2p) to acyl-CoA-consuming processes	1	92.1118	0.000666788	155.07	No known flanking GlyGly site, ratio may be meaningful	0.224703			0.224703
1664	2039	1791	YNR016C	ACC1	>YNR016C ACC1 SGDID:S000005299, Chr XIV from 661376-654675, reverse complement, Verified ORF, Acetyl-CoA carboxylase, biotin containing enzyme that catalyzes the carboxylation of acetyl-CoA to form malonyl-CoA; required for de novo biosynthesis of long-ch	1	64.82	0.0196567	64.82	No flanking Lys, ratio valid	0.901775			0.901775
1665	1147	1791	YNR016C	ACC1	>YNR016C ACC1 SGDID:S000005299, Chr XIV from 661376-654675, reverse complement, Verified ORF, Acetyl-CoA carboxylase, biotin containing enzyme that catalyzes the carboxylation of acetyl-CoA to form malonyl-CoA; required for de novo biosynthesis of long-ch	1	88.1551	0.00122943	88.155	No known flanking GlyGly site, ratio may be meaningful	0.874797			0.874797
1666	252	1791	YNR016C	ACC1	>YNR016C ACC1 SGDID:S000005299, Chr XIV from 661376-654675, reverse complement, Verified ORF, Acetyl-CoA carboxylase, biotin containing enzyme that catalyzes the carboxylation of acetyl-CoA to form malonyl-CoA; required for de novo biosynthesis of long-ch	1	63.4884	0.00456791	68.536	No known flanking GlyGly site, ratio may be meaningful	0.748164			0.748164
1667	1668	1791	YNR016C	ACC1	>YNR016C ACC1 SGDID:S000005299, Chr XIV from 661376-654675, reverse complement, Verified ORF, Acetyl-CoA carboxylase, biotin containing enzyme that catalyzes the carboxylation of acetyl-CoA to form malonyl-CoA; required for de novo biosynthesis of long-ch	0.985716	18.3892	0.000735393	144.51	No known flanking GlyGly site, ratio may be meaningful	1.04342			1.04342
1668	2061	1791	YNR016C	ACC1	>YNR016C ACC1 SGDID:S000005299, Chr XIV from 661376-654675, reverse complement, Verified ORF, Acetyl-CoA carboxylase, biotin containing enzyme that catalyzes the carboxylation of acetyl-CoA to form malonyl-CoA; required for de novo biosynthesis of long-ch	1	151.73	0.000990157	151.73	No known flanking GlyGly site, ratio may be meaningful	0.925697	1.07164		0.995998
1310	417	1386	YLR144C	ACF2	>YLR144C ACF2 SGDID:S000004134, Chr XII from 432017-429678, reverse complement, Verified ORF, Intracellular beta-1,3-endoglucanase, expression is induced during sporulation; may have a role in cortical actin cytoskeleton assembly	1	93.6078	0.00117758	237.76	No known flanking GlyGly site, ratio may be meaningful
1365	254	1440	YLR304C	ACO1	>YLR304C ACO1 SGDID:S000004295, Chr XII from 737550-735214, reverse complement, Verified ORF, Aconitase, required for the tricarboxylic acid (TCA) cycle and also independently required for mitochondrial genome maintenance; phosphorylated; component of the	1	176.484	0.000201578	176.48	No known flanking GlyGly site, ratio may be meaningful	0.617303			0.617303
1222	58	1285	YKL192C	ACP1	>YKL192C ACP1 SGDID:S000001675, Chr XI from 80542-80165, reverse complement, Verified ORF, Mitochondrial matrix acyl carrier protein, involved in biosynthesis of octanoate, which is a precursor to lipoic acid; activated by phosphopantetheinylation catalyz	1	169.652	0.000422746	175.38	No known flanking GlyGly site, ratio may be meaningful
1316	622	1388	YLR153C	ACS2	>YLR153C ACS2 SGDID:S000004143, Chr XII from 447576-445525, reverse complement, Verified ORF, Acetyl-coA synthetase isoform which, along with Acs1p, is the nuclear source of acetyl-coA for histone acetylation; mutants affect global transcription; required	1	191.19	0.000953091	191.19	No flanking Lys, ratio valid	0.624059			0.624059
1317	388	1388	YLR153C	ACS2	>YLR153C ACS2 SGDID:S000004143, Chr XII from 447576-445525, reverse complement, Verified ORF, Acetyl-coA synthetase isoform which, along with Acs1p, is the nuclear source of acetyl-coA for histone acetylation; mutants affect global transcription; required	1	85.9764	0.00800349	85.976	No flanking Lys, ratio valid	1.13819			1.13819
714	326	708	YFL039C	ACT1	>YFL039C ACT1 SGDID:S000001855, Chr VI from 54695-54686,54377-53260, reverse complement, Verified ORF, Actin, structural protein involved in cell polarization, endocytosis, and other cytoskeletal functions	1	91.0872	0.0814156	91.087	Known Flanking GlyGly site, ratio meaningless
715	315	708	YFL039C	ACT1	>YFL039C ACT1 SGDID:S000001855, Chr VI from 54695-54686,54377-53260, reverse complement, Verified ORF, Actin, structural protein involved in cell polarization, endocytosis, and other cytoskeletal functions	1	156.517	0.000114931	156.52	Known Flanking GlyGly site, ratio meaningless
716	113	708	YFL039C	ACT1	>YFL039C ACT1 SGDID:S000001855, Chr VI from 54695-54686,54377-53260, reverse complement, Verified ORF, Actin, structural protein involved in cell polarization, endocytosis, and other cytoskeletal functions	1	70.8885	7.00894e-05	95.183	No flanking Lys, ratio valid	0.65215		0.810381	0.726973
89	291	97	YAR015W	ADE1	>YAR015W ADE1 SGDID:S000000070, Chr I from 169370-170290, Verified ORF, N-succinyl-5-aminoimidazole-4-carboxamide ribotide (SAICAR) synthetase, required for 'de novo' purine nucleotide biosynthesis; red pigment accumulates in mutant cells deprived of aden	1	86.8981	0.00246136	86.898	No known flanking GlyGly site, ratio may be meaningful	0.851997			0.851997
1271	200	1357	YLR028C	ADE16	>YLR028C ADE16 SGDID:S000004018, Chr XII from 201316-199541, reverse complement, Verified ORF, Enzyme of 'de novo' purine biosynthesis containing both 5-aminoimidazole-4-carboxamide ribonucleotide transformylase and inosine monophosphate cyclohydrolase ac	1	148.987	0.000457344	188.76	No known flanking GlyGly site, ratio may be meaningful	1.05066		1.92386	1.42173
1479	557	1588	YMR120C	ADE17	>YMR120C ADE17 SGDID:S000004727, Chr XIII from 509279-507501, reverse complement, Verified ORF, Enzyme of 'de novo' purine biosynthesis containing both 5-aminoimidazole-4-carboxamide ribonucleotide transformylase and inosine monophosphate cyclohydrolase a	1	154.131	0.000209727	234.83	No known flanking GlyGly site, ratio may be meaningful	1.07835	1.20433		1.1396
909	374	891	YGR204W	ADE3	>YGR204W ADE3 SGDID:S000003436, Chr VII from 905939-908779, Verified ORF, Cytoplasmic trifunctional enzyme C1-tetrahydrofolate synthase, involved in single carbon metabolism and required for biosynthesis of purines, thymidylate, methionine, and histidine	1	102.294	0.000351621	102.29	No known flanking GlyGly site, ratio may be meaningful	0.8582		0.976839	0.9156
1701	276	1839	YOL086C	ADH1	>YOL086C ADH1 SGDID:S000005446, Chr XV from 160594-159548, reverse complement, Verified ORF, Alcohol dehydrogenase, fermentative isozyme active as homo- or heterotetramers; required for the reduction of acetaldehyde to ethanol, the last step in the glycol	1	40.7983	0.0035719	40.798	No known flanking GlyGly site, ratio may be meaningful	0.937681			0.937681
1702	315	1839	YOL086C	ADH1	>YOL086C ADH1 SGDID:S000005446, Chr XV from 160594-159548, reverse complement, Verified ORF, Alcohol dehydrogenase, fermentative isozyme active as homo- or heterotetramers; required for the reduction of acetaldehyde to ethanol, the last step in the glycol	1	99.9731	0.00648053	99.973	Known Flanking GlyGly site, ratio meaningless
1703	319	1839	YOL086C	ADH1	>YOL086C ADH1 SGDID:S000005446, Chr XV from 160594-159548, reverse complement, Verified ORF, Alcohol dehydrogenase, fermentative isozyme active as homo- or heterotetramers; required for the reduction of acetaldehyde to ethanol, the last step in the glycol	1	246.856	0.000220136	255.28	Known Flanking GlyGly site, ratio meaningless
1704	335	1839	YOL086C	ADH1	>YOL086C ADH1 SGDID:S000005446, Chr XV from 160594-159548, reverse complement, Verified ORF, Alcohol dehydrogenase, fermentative isozyme active as homo- or heterotetramers; required for the reduction of acetaldehyde to ethanol, the last step in the glycol	1	83.8686	0.000230662	176.48	Known Flanking GlyGly site, ratio meaningless
1705	332	1839	YOL086C	ADH1	>YOL086C ADH1 SGDID:S000005446, Chr XV from 160594-159548, reverse complement, Verified ORF, Alcohol dehydrogenase, fermentative isozyme active as homo- or heterotetramers; required for the reduction of acetaldehyde to ethanol, the last step in the glycol	1	235.661	1.957e-05	235.66	Known Flanking GlyGly site, ratio meaningless
1706	207	1839	YOL086C	ADH1	>YOL086C ADH1 SGDID:S000005446, Chr XV from 160594-159548, reverse complement, Verified ORF, Alcohol dehydrogenase, fermentative isozyme active as homo- or heterotetramers; required for the reduction of acetaldehyde to ethanol, the last step in the glycol	1	145.936	4.25877e-06	240.85	No flanking Lys, ratio valid	1.15145	0.984238	0.743444	0.94449
498	47	474	YDR226W	ADK1	>YDR226W ADK1 SGDID:S000002634, Chr IV from 916483-917151, Verified ORF, Adenylate kinase, required for purine metabolism; localized to the cytoplasm and the mitochondria; lacks cleavable signal sequence	1	217.016	1.60044e-71	217.02	No known flanking GlyGly site, ratio may be meaningful	1.57509		1.02346	1.26966
1142	107	1198	YJR105W	ADO1	>YJR105W ADO1 SGDID:S000003866, Chr X from 623570-624592, Verified ORF, Adenosine kinase, required for the utilization of S-adenosylmethionine (AdoMet); may be involved in recycling adenosine produced through the methyl cycle	1	106.157	9.86069e-05	106.16	No known flanking GlyGly site, ratio may be meaningful
1143	40	1198	YJR105W	ADO1	>YJR105W ADO1 SGDID:S000003866, Chr X from 623570-624592, Verified ORF, Adenosine kinase, required for the utilization of S-adenosylmethionine (AdoMet); may be involved in recycling adenosine produced through the methyl cycle	1	127.52	0.000708879	127.52	Known Flanking GlyGly site, ratio meaningless
1144	45	1198	YJR105W	ADO1	>YJR105W ADO1 SGDID:S000003866, Chr X from 623570-624592, Verified ORF, Adenosine kinase, required for the utilization of S-adenosylmethionine (AdoMet); may be involved in recycling adenosine produced through the methyl cycle	1	43.7638	0.000156669	124.6	Known Flanking GlyGly site, ratio meaningless
1145	278	1198	YJR105W	ADO1	>YJR105W ADO1 SGDID:S000003866, Chr X from 623570-624592, Verified ORF, Adenosine kinase, required for the utilization of S-adenosylmethionine (AdoMet); may be involved in recycling adenosine produced through the methyl cycle	1	205.311	9.22165e-07	205.31	No known flanking GlyGly site, ratio may be meaningful	0.194211	0.436927	0.101562	0.205024
1146	247	1198	YJR105W	ADO1	>YJR105W ADO1 SGDID:S000003866, Chr X from 623570-624592, Verified ORF, Adenosine kinase, required for the utilization of S-adenosylmethionine (AdoMet); may be involved in recycling adenosine produced through the methyl cycle	1	89.3692	0.00176385	101.69	No known flanking GlyGly site, ratio may be meaningful	1.01829	0.676126	1.01113	0.886277		0.960072	0.960072
1923	378	2049	YPL202C	AFT2	>YPL202C AFT2 SGDID:S000006123, Chr XVI from 169337-168087, reverse complement, Verified ORF, Iron-regulated transcriptional activator; activates genes involved in intracellular iron use and required for iron homeostasis and resistance to oxidative stress	1	92.2652	0.000849679	107.03	No known flanking GlyGly site, ratio may be meaningful
273	98	252	YCL025C	AGP1	>YCL025C AGP1 SGDID:S000000530, Chr III from 77919-76018, reverse complement, Verified ORF, Low-affinity amino acid permease with broad substrate range, involved in uptake of asparagine, glutamine, and other amino acids; expression is regulated by the SPS	1	150.763	6.25709e-06	378.72	No known flanking GlyGly site, ratio may be meaningful
274	11	252	YCL025C	AGP1	>YCL025C AGP1 SGDID:S000000530, Chr III from 77919-76018, reverse complement, Verified ORF, Low-affinity amino acid permease with broad substrate range, involved in uptake of asparagine, glutamine, and other amino acids; expression is regulated by the SPS	1	107.688	1.29084e-07	236.92	Known Flanking GlyGly site, ratio meaningless
275	5	252	YCL025C	AGP1	>YCL025C AGP1 SGDID:S000000530, Chr III from 77919-76018, reverse complement, Verified ORF, Low-affinity amino acid permease with broad substrate range, involved in uptake of asparagine, glutamine, and other amino acids; expression is regulated by the SPS	1	107.688	6.60564e-06	205.36	Known Flanking GlyGly site, ratio meaningless
204	595	189	YBR132C	AGP2	>YBR132C AGP2 SGDID:S000000336, Chr II from 501436-499646, reverse complement, Verified ORF, High affinity polyamine permease, preferentially uses spermidine over putrescine; expression is down-regulated by osmotic stress; plasma membrane carnitine transp	1	130.221	0.0197235	130.22	No known flanking GlyGly site, ratio may be meaningful
205	20	189	YBR132C	AGP2	>YBR132C AGP2 SGDID:S000000336, Chr II from 501436-499646, reverse complement, Verified ORF, High affinity polyamine permease, preferentially uses spermidine over putrescine; expression is down-regulated by osmotic stress; plasma membrane carnitine transp	1	278.638	6.23821e-05	278.64	Known Flanking GlyGly site, ratio meaningless
206	22	189	YBR132C	AGP2	>YBR132C AGP2 SGDID:S000000336, Chr II from 501436-499646, reverse complement, Verified ORF, High affinity polyamine permease, preferentially uses spermidine over putrescine; expression is down-regulated by osmotic stress; plasma membrane carnitine transp	0.866503	8.12297	0.000130046	109.54	Known Flanking GlyGly site, ratio meaningless
1303	113	1379	YLR109W	AHP1	>YLR109W AHP1 SGDID:S000004099, Chr XII from 368782-369312, Verified ORF, Thiol-specific peroxiredoxin, reduces hydroperoxides to protect against oxidative damage; function in vivo requires covalent conjugation to Urm1p	1	96.5608	0.000537856	190.46	Known Flanking GlyGly site, ratio meaningless
1304	7	1379	YLR109W	AHP1	>YLR109W AHP1 SGDID:S000004099, Chr XII from 368782-369312, Verified ORF, Thiol-specific peroxiredoxin, reduces hydroperoxides to protect against oxidative damage; function in vivo requires covalent conjugation to Urm1p	1	99.5106	3.13049e-39	109.66	Known Flanking GlyGly site, ratio meaningless
1305	8	1379	YLR109W	AHP1	>YLR109W AHP1 SGDID:S000004099, Chr XII from 368782-369312, Verified ORF, Thiol-specific peroxiredoxin, reduces hydroperoxides to protect against oxidative damage; function in vivo requires covalent conjugation to Urm1p	0.99981	37.2202	4.36916e-06	227.47	Known Flanking GlyGly site, ratio meaningless
1306	107	1379	YLR109W	AHP1	>YLR109W AHP1 SGDID:S000004099, Chr XII from 368782-369312, Verified ORF, Thiol-specific peroxiredoxin, reduces hydroperoxides to protect against oxidative damage; function in vivo requires covalent conjugation to Urm1p	1	148.944	1.08929e-21	213.85	Known Flanking GlyGly site, ratio meaningless
1845	673	1978	YOR335C	ALA1	>YOR335C ALA1 SGDID:S000005862, Chr XV from 949106-946230, reverse complement, Verified ORF, Cytoplasmic alanyl-tRNA synthetase, required for protein synthesis; point mutation (cdc64-1 allele) causes cell cycle arrest at G1; lethality of null mutation is	1	83.7509	0.0540242	83.751	No known flanking GlyGly site, ratio may be meaningful	1.93943			1.93943
1489	77;77	1604;1605	YMR169C;YMR170C	ALD3	>YMR169C ALD3 SGDID:S000004779, Chr XIII from 600871-599351, reverse complement, Verified ORF, Cytoplasmic aldehyde dehydrogenase, involved in beta-alanine synthesis; uses NAD+ as the preferred coenzyme; very similar to Ald2p; expression is induced by str	1	66.5682	0.0647537	66.568	No flanking Lys, ratio valid	6.65067		0.637286	2.05873
1879	142	2010	YPL061W	ALD6	>YPL061W ALD6 SGDID:S000005982, Chr XVI from 432585-434087, Verified ORF, Cytosolic aldehyde dehydrogenase, activated by Mg2+ and utilizes NADP+ as the preferred coenzyme; required for conversion of acetaldehyde to acetate; constitutively expressed; locat	1	124.08	0.000457344	148.99	No flanking Lys, ratio valid	0.357646	0.369129		0.363342
1880	402	2010	YPL061W	ALD6	>YPL061W ALD6 SGDID:S000005982, Chr XVI from 432585-434087, Verified ORF, Cytosolic aldehyde dehydrogenase, activated by Mg2+ and utilizes NADP+ as the preferred coenzyme; required for conversion of acetaldehyde to acetate; constitutively expressed; locat	1	171.358	0.00104218	173.04	No known flanking GlyGly site, ratio may be meaningful	0.546792	0.663062	0.767892	0.652968
1881	214	2010	YPL061W	ALD6	>YPL061W ALD6 SGDID:S000005982, Chr XVI from 432585-434087, Verified ORF, Cytosolic aldehyde dehydrogenase, activated by Mg2+ and utilizes NADP+ as the preferred coenzyme; required for conversion of acetaldehyde to acetate; constitutively expressed; locat	1	62.7994	0.00175296	147.3	No known flanking GlyGly site, ratio may be meaningful	0.608564	0.782943		0.690269		0.283278	0.283278
1882	267	2010	YPL061W	ALD6	>YPL061W ALD6 SGDID:S000005982, Chr XVI from 432585-434087, Verified ORF, Cytosolic aldehyde dehydrogenase, activated by Mg2+ and utilizes NADP+ as the preferred coenzyme; required for conversion of acetaldehyde to acetate; constitutively expressed; locat	1	138.205	5.86833e-06	238.98	No known flanking GlyGly site, ratio may be meaningful	0.645372	0.805184	0.83042	0.755674		0.401986	0.401986
1883	3	2010	YPL061W	ALD6	>YPL061W ALD6 SGDID:S000005982, Chr XVI from 432585-434087, Verified ORF, Cytosolic aldehyde dehydrogenase, activated by Mg2+ and utilizes NADP+ as the preferred coenzyme; required for conversion of acetaldehyde to acetate; constitutively expressed; locat	1	94.4023	1.02934e-05	191.48	No known flanking GlyGly site, ratio may be meaningful	0.715048	1.11	0.88175	0.887838
1884	342	2010	YPL061W	ALD6	>YPL061W ALD6 SGDID:S000005982, Chr XVI from 432585-434087, Verified ORF, Cytosolic aldehyde dehydrogenase, activated by Mg2+ and utilizes NADP+ as the preferred coenzyme; required for conversion of acetaldehyde to acetate; constitutively expressed; locat	1	365.69	0.000220136	379.08	No known flanking GlyGly site, ratio may be meaningful	0.565128	0.778224	0.455235	0.585009
1885	474	2010	YPL061W	ALD6	>YPL061W ALD6 SGDID:S000005982, Chr XVI from 432585-434087, Verified ORF, Cytosolic aldehyde dehydrogenase, activated by Mg2+ and utilizes NADP+ as the preferred coenzyme; required for conversion of acetaldehyde to acetate; constitutively expressed; locat	1	138.205	1.35654e-06	281.32	No flanking Lys, ratio valid	0.491783			0.491783
1434	373	1526	YML086C	ALO1	>YML086C ALO1 SGDID:S000004551, Chr XIII from 97371-95791, reverse complement, Verified ORF, D-Arabinono-1,4-lactone oxidase, catalyzes the final step in biosynthesis of D-erythroascorbic acid, which is protective against oxidative stress	1	145.686	5.13426e-08	152.54	No flanking Lys, ratio valid		0.937944	0.98359	0.960496
1231	711	1302	YKR021W	ALY1	>YKR021W ALY1 SGDID:S000001729, Chr XI from 478877-481624, Uncharacterized ORF, Putative protein of unknown function; green fluorescent protein (GFP)-fusion protein localizes to the cytoplasm	1	82.645	0.020899	82.645	No known flanking GlyGly site, ratio may be meaningful	1.11445			1.11445
1080	903	1114	YJL084C	ALY2	>YJL084C ALY2 SGDID:S000003620, Chr X from 277997-274857, reverse complement, Verified ORF, Cytoplasmic protein of unknown function that interacts with the cyclin Pcl7p; phosphorylated in vitro by the cyclin-CDK complex, Pcl7p-Pho85p; identified as a pote	1	68.2235	0.0814156	68.224	No known flanking GlyGly site, ratio may be meaningful
1081	392	1114	YJL084C	ALY2	>YJL084C ALY2 SGDID:S000003620, Chr X from 277997-274857, reverse complement, Verified ORF, Cytoplasmic protein of unknown function that interacts with the cyclin Pcl7p; phosphorylated in vitro by the cyclin-CDK complex, Pcl7p-Pho85p; identified as a pote	1	132.084	0.000267963	176.41	No known flanking GlyGly site, ratio may be meaningful
1082	631	1114	YJL084C	ALY2	>YJL084C ALY2 SGDID:S000003620, Chr X from 277997-274857, reverse complement, Verified ORF, Cytoplasmic protein of unknown function that interacts with the cyclin Pcl7p; phosphorylated in vitro by the cyclin-CDK complex, Pcl7p-Pho85p; identified as a pote	1	113.706	8.9641e-10	205.36	Known Flanking GlyGly site, ratio meaningless
1083	616	1114	YJL084C	ALY2	>YJL084C ALY2 SGDID:S000003620, Chr X from 277997-274857, reverse complement, Verified ORF, Cytoplasmic protein of unknown function that interacts with the cyclin Pcl7p; phosphorylated in vitro by the cyclin-CDK complex, Pcl7p-Pho85p; identified as a pote	1	203.851	9.0248e-06	203.85	Known Flanking GlyGly site, ratio meaningless
1084	629	1114	YJL084C	ALY2	>YJL084C ALY2 SGDID:S000003620, Chr X from 277997-274857, reverse complement, Verified ORF, Cytoplasmic protein of unknown function that interacts with the cyclin Pcl7p; phosphorylated in vitro by the cyclin-CDK complex, Pcl7p-Pho85p; identified as a pote	1	224.432	0.000352315	299.2	Known Flanking GlyGly site, ratio meaningless
1085	784	1114	YJL084C	ALY2	>YJL084C ALY2 SGDID:S000003620, Chr X from 277997-274857, reverse complement, Verified ORF, Cytoplasmic protein of unknown function that interacts with the cyclin Pcl7p; phosphorylated in vitro by the cyclin-CDK complex, Pcl7p-Pho85p; identified as a pote	1	89.9924	1.5312e-05	89.992	No known flanking GlyGly site, ratio may be meaningful
1581	509	1704	YNL077W	APJ1	>YNL077W APJ1 SGDID:S000005021, Chr XIV from 481392-482978, Verified ORF, Putative chaperone of the HSP40 (DNAJ) family; overexpression interferes with propagation of the [Psi+] prion; the authentic, non-tagged protein is detected in highly purified mitoc	1	71.3156	0.00396478	131.52	No flanking Lys, ratio valid
1113	5	1165	YJR005W	APL1	>YJR005W APL1 SGDID:S000003765, Chr X from 445916-448018, Verified ORF, Beta-adaptin, large subunit of the clathrin associated protein complex (AP-2); involved in vesicle mediated transport; similar to mammalian beta-chain of the clathrin associated prote	1	153.083	8.2124e-07	153.08	No flanking Lys, ratio valid
1200	691	1264	YKL135C	APL2	>YKL135C APL2 SGDID:S000001618, Chr XI from 188645-186465, reverse complement, Verified ORF, Beta-adaptin, large subunit of the clathrin-associated protein (AP-1) complex; binds clathrin; involved in clathrin-dependent Golgi protein sorting	1	115.494	0.00665634	115.49	No known flanking GlyGly site, ratio may be meaningful
1201	25	1264	YKL135C	APL2	>YKL135C APL2 SGDID:S000001618, Chr XI from 188645-186465, reverse complement, Verified ORF, Beta-adaptin, large subunit of the clathrin-associated protein (AP-1) complex; binds clathrin; involved in clathrin-dependent Golgi protein sorting	1	67.4937	8.65365e-05	148.69	No known flanking GlyGly site, ratio may be meaningful
955	207	933	YHL019C	APM2	>YHL019C APM2 SGDID:S000001011, Chr VIII from 69545-67728, reverse complement, Verified ORF, Protein of unknown function, homologous to the medium chain of mammalian clathrin-associated protein complex; involved in vesicular transport	1	86.0142	0.0114776	86.014	No known flanking GlyGly site, ratio may be meaningful	1.77137			1.77137
1383	29	1460	YLR370C	ARC18	>YLR370C ARC18 SGDID:S000004362, Chr XII from 862253-861717, reverse complement, Verified ORF, Subunit of the ARP2/3 complex, which is required for the motility and integrity of cortical actin patches	1	126.705	0.000215752	155.14	No flanking Lys, ratio valid	0.311675			0.311675
1669	238	1798	YNR035C	ARC35	>YNR035C ARC35 SGDID:S000005318, Chr XIV from 694049-693021, reverse complement, Verified ORF, Subunit of the ARP2/3 complex, which is required for the motility and integrity of cortical actin patches; required for cortical localization of calmodulin	1	40.9413	0.0283196	40.941	No flanking Lys, ratio valid	0.296218			0.296218
240	338	227	YBR234C	ARC40	>YBR234C ARC40 SGDID:S000000438, Chr II from 686587-685433, reverse complement, Verified ORF, Subunit of the ARP2/3 complex, which is required for the motility and integrity of cortical actin patches	1	65.731	0.0083482	107.11	No known flanking GlyGly site, ratio may be meaningful
641	11	636	YER069W	ARG5,6	>YER069W ARG5,6 SGDID:S000000871, Chr V from 295408-297999, Verified ORF, Protein that is processed in the mitochondrion to yield acetylglutamate kinase and N-acetyl-gamma-glutamyl-phosphate reductase, which catalyze the 2nd and 3rd steps in arginine bios	1	48.131	0.0150219	48.131	No flanking Lys, ratio valid	0.798124		1.37748	1.04852
218	150	204	YBR164C	ARL1	>YBR164C ARL1 SGDID:S000000368, Chr II from 568421-567870, reverse complement, Verified ORF, Soluble GTPase with a role in regulation of membrane traffic; regulates potassium influx; G protein of the Ras superfamily, similar to ADP-ribosylation factor	1	183.987	0.000923298	186.43	No known flanking GlyGly site, ratio may be meaningful
472	1587	445	YDR127W	ARO1	>YDR127W ARO1 SGDID:S000002534, Chr IV from 704482-709248, Verified ORF, Pentafunctional arom protein, catalyzes steps 2 through 6 in the biosynthesis of chorismate, which is a precursor to aromatic amino acids	1	70.5516	0.0226971	70.552	No known flanking GlyGly site, ratio may be meaningful	0.91984			0.91984
473	888	445	YDR127W	ARO1	>YDR127W ARO1 SGDID:S000002534, Chr IV from 704482-709248, Verified ORF, Pentafunctional arom protein, catalyzes steps 2 through 6 in the biosynthesis of chorismate, which is a precursor to aromatic amino acids	1	51.9785	0.0551462	51.979	Known Flanking GlyGly site, ratio meaningless
474	889	445	YDR127W	ARO1	>YDR127W ARO1 SGDID:S000002534, Chr IV from 704482-709248, Verified ORF, Pentafunctional arom protein, catalyzes steps 2 through 6 in the biosynthesis of chorismate, which is a precursor to aromatic amino acids	1	51.9785	0.0551462	51.979	Known Flanking GlyGly site, ratio meaningless
529	8	520	YDR380W	ARO10	>YDR380W ARO10 SGDID:S000002788, Chr IV from 1234211-1236118, Verified ORF, Phenylpyruvate decarboxylase, catalyzes decarboxylation of phenylpyruvate to phenylacetaldehyde, which is the first specific step in the Ehrlich pathway	1	118.24	0.000475127	137.09	No flanking Lys, ratio valid
530	372	520	YDR380W	ARO10	>YDR380W ARO10 SGDID:S000002788, Chr IV from 1234211-1236118, Verified ORF, Phenylpyruvate decarboxylase, catalyzes decarboxylation of phenylpyruvate to phenylacetaldehyde, which is the first specific step in the Ehrlich pathway	1	164.641	0.000522071	164.64	No known flanking GlyGly site, ratio may be meaningful
531	33	520	YDR380W	ARO10	>YDR380W ARO10 SGDID:S000002788, Chr IV from 1234211-1236118, Verified ORF, Phenylpyruvate decarboxylase, catalyzes decarboxylation of phenylpyruvate to phenylacetaldehyde, which is the first specific step in the Ehrlich pathway	1	138.247	0.000225473	138.25	No flanking Lys, ratio valid
791	6	788	YGL148W	ARO2	>YGL148W ARO2 SGDID:S000003116, Chr VII from 226404-227534, Verified ORF, Bifunctional chorismate synthase and flavin reductase, catalyzes the conversion of 5-enolpyruvylshikimate 3-phosphate (EPSP) to form chorismate, which is a precursor to aromatic ami	1	45.6801	0.0379453	45.68	No flanking Lys, ratio valid	0.609437	0.865019		0.726067
241	120	231	YBR249C	ARO4	>YBR249C ARO4 SGDID:S000000453, Chr II from 717989-716877, reverse complement, Verified ORF, 3-deoxy-D-arabino-heptulosonate-7-phosphate (DAHP) synthase, catalyzes the first step in aromatic amino acid biosynthesis and is feedback-inhibited by tyrosine or	1	96.3709	0.000931052	107.99	No known flanking GlyGly site, ratio may be meaningful	0.552593			0.552593
799	305	801	YGL202W	ARO8	>YGL202W ARO8 SGDID:S000003170, Chr VII from 116063-117565, Verified ORF, Aromatic aminotransferase I, expression is regulated by general control of amino acid biosynthesis	1	99.0691	6.67e-05	157.38	No flanking Lys, ratio valid	0.898173			0.898173
1476	53	1587	YMR116C	ASC1	>YMR116C ASC1 SGDID:S000004722, Chr XIII from 500687-500151,499877-499455, reverse complement, Verified ORF, G-protein beta subunit and guanine nucleotide dissociation inhibitor for Gpa2p; ortholog of RACK1 that inhibits translation; core component of the	1	126.243	6.00887e-05	234.04	Known Flanking GlyGly site, ratio meaningless
1477	46	1587	YMR116C	ASC1	>YMR116C ASC1 SGDID:S000004722, Chr XIII from 500687-500151,499877-499455, reverse complement, Verified ORF, G-protein beta subunit and guanine nucleotide dissociation inhibitor for Gpa2p; ortholog of RACK1 that inhibits translation; core component of the	1	147.388	0.00155	147.39	Known Flanking GlyGly site, ratio meaningless
1478	161	1587	YMR116C	ASC1	>YMR116C ASC1 SGDID:S000004722, Chr XIII from 500687-500151,499877-499455, reverse complement, Verified ORF, G-protein beta subunit and guanine nucleotide dissociation inhibitor for Gpa2p; ortholog of RACK1 that inhibits translation; core component of the	1	76.8677	8.95169e-08	203.61	No known flanking GlyGly site, ratio may be meaningful	0.691954	0.677703	0.864979	0.740243
1100	107	1148	YJL170C	ASG7	>YJL170C ASG7 SGDID:S000003706, Chr X from 101773-101144, reverse complement, Verified ORF, Protein that regulates signaling from a G protein beta subunit Ste4p and its relocalization within the cell; specific to a-cells and induced by alpha-factor	1	106.597	0.00131424	106.6	No flanking Lys, ratio valid
1985	266	2122	YPR145W	ASN1	>YPR145W ASN1 SGDID:S000006349, Chr XVI from 822616-824334, Verified ORF, Asparagine synthetase, isozyme of Asn2p; catalyzes the synthesis of L-asparagine from L-aspartate in the asparagine biosynthetic pathway	1	119.617	3.68459e-07	244	No known flanking GlyGly site, ratio may be meaningful	0.686343	0.584153	1.36967	0.818894
1986	530	2122	YPR145W	ASN1	>YPR145W ASN1 SGDID:S000006349, Chr XVI from 822616-824334, Verified ORF, Asparagine synthetase, isozyme of Asn2p; catalyzes the synthesis of L-asparagine from L-aspartate in the asparagine biosynthetic pathway	1	111.008	0.000580688	169.76	No known flanking GlyGly site, ratio may be meaningful	0.850293	0.938004	0.989808	0.924219
1987	154	2122	YPR145W	ASN1	>YPR145W ASN1 SGDID:S000006349, Chr XVI from 822616-824334, Verified ORF, Asparagine synthetase, isozyme of Asn2p; catalyzes the synthesis of L-asparagine from L-aspartate in the asparagine biosynthetic pathway	1	147.577	0.000616546	147.58	No known flanking GlyGly site, ratio may be meaningful	1.26074			1.26074
846	529	858	YGR124W	ASN2	>YGR124W ASN2 SGDID:S000003356, Chr VII from 739949-741667, Verified ORF, Asparagine synthetase, isozyme of Asn1p; catalyzes the synthesis of L-asparagine from L-aspartate in the asparagine biosynthetic pathway	1	121.899	0.000797872	121.9	No known flanking GlyGly site, ratio may be meaningful	1.11506	0.864976	0.7966	0.915898
119	12	127	YBL069W	AST1	>YBL069W AST1 SGDID:S000000165, Chr II from 90739-92028, Verified ORF, Peripheral membrane protein that interacts with the plasma membrane ATPase Pma1p and has a role in its targeting to the plasma membrane, possibly by influencing its incorporation into	1	69.6115	0.0411294	69.612	No known flanking GlyGly site, ratio may be meaningful
665	4	656	YER101C	AST2	>YER101C AST2 SGDID:S000000903, Chr V from 361790-360498, reverse complement, Verified ORF, Protein that may have a role in targeting of plasma membrane [H+]ATPase (Pma1p) to the plasma membrane, as suggested by analysis of genetic interactions	1	44.3492	0.00543076	92.906	No known flanking GlyGly site, ratio may be meaningful
1696	216	1837	YOL082W	ATG19	>YOL082W ATG19 SGDID:S000005442, Chr XV from 168727-169974, Verified ORF, Receptor protein for the cytoplasm-to-vacuole targeting (Cvt) pathway; recognizes cargo proteins aminopeptidase I (Lap4p) and alpha-mannosidase (Ams1p) and delivers them to the prea	1	154.357	6.00833e-05	195.51	No known flanking GlyGly site, ratio may be meaningful	0.362404	0.599953	0.855557	0.570847
1432	51	1524	YML081C-A	ATP18	>YML081C-A ATP18 SGDID:S000007247, Chr XIII from 104162-103983, reverse complement, Verified ORF, Subunit of the mitochondrial F1F0 ATP synthase, which is a large enzyme complex required for ATP synthesis; termed subunit I or subunit j; does not correspon	0.998883	29.5165	0.00237155	137.05	Known Flanking GlyGly site, ratio meaningless
1433	54	1524	YML081C-A	ATP18	>YML081C-A ATP18 SGDID:S000007247, Chr XIII from 104162-103983, reverse complement, Verified ORF, Subunit of the mitochondrial F1F0 ATP synthase, which is a large enzyme complex required for ATP synthesis; termed subunit I or subunit j; does not correspon	1	82.2405	0.0203406	82.241	Known Flanking GlyGly site, ratio meaningless
1886	223	2013	YPL078C	ATP4	>YPL078C ATP4 SGDID:S000005999, Chr XVI from 408741-408007, reverse complement, Verified ORF, Subunit b of the stator stalk of mitochondrial F1F0 ATP synthase, which is a large, evolutionarily conserved enzyme complex required for ATP synthesis; phosphory	1	116.546	1.8345e-22	116.55	No known flanking GlyGly site, ratio may be meaningful			1.03414	1.03414
1743	216	1865	YOR011W	AUS1	>YOR011W AUS1 SGDID:S000005537, Chr XV from 349679-353863, Verified ORF, Transporter of the ATP-binding cassette family, involved in uptake of sterols and anaerobic growth	0.999703	35.2642	0.0188115	84.025	No known flanking GlyGly site, ratio may be meaningful
1111	191	1163	YJR001W	AVT1	>YJR001W AVT1 SGDID:S000003761, Chr X from 436796-438604, Verified ORF, Vacuolar transporter, imports large neutral amino acids into the vacuole; member of a family of seven S. cerevisiae genes (AVT1-7) related to vesicular GABA-glycine transporters	1	110.15	3.57257e-06	223.83	No flanking Lys, ratio valid	1.60004		1.28053	1.4314
1112	93	1163	YJR001W	AVT1	>YJR001W AVT1 SGDID:S000003761, Chr X from 436796-438604, Verified ORF, Vacuolar transporter, imports large neutral amino acids into the vacuole; member of a family of seven S. cerevisiae genes (AVT1-7) related to vesicular GABA-glycine transporters	1	174.181	0.000218433	185.14	No flanking Lys, ratio valid	1.48883			1.48883
615	9	600	YEL064C	AVT2	>YEL064C AVT2 SGDID:S000000790, Chr V from 31239-29797, reverse complement, Verified ORF, Putative transporter, member of a family of seven S. cerevisiae genes (AVT1-7) related to vesicular GABA-glycine transporters	1	182.369	3.95125e-18	182.37	Known Flanking GlyGly site, ratio meaningless
616	13	600	YEL064C	AVT2	>YEL064C AVT2 SGDID:S000000790, Chr V from 31239-29797, reverse complement, Verified ORF, Putative transporter, member of a family of seven S. cerevisiae genes (AVT1-7) related to vesicular GABA-glycine transporters	0.999983	47.7633	8.61884e-05	181.76	Known Flanking GlyGly site, ratio meaningless
1205	4	1269	YKL146W	AVT3	>YKL146W AVT3 SGDID:S000001629, Chr XI from 171788-173866, Verified ORF, Vacuolar transporter, exports large neutral amino acids from the vacuole; member of a family of seven S. cerevisiae genes (AVT1-7) related to vesicular GABA-glycine transporters	1	88.2244	0.000307522	88.224	No flanking Lys, ratio valid	2.02416	1.18789		1.55064
1044	664	1070	YIL140W	AXL2	>YIL140W AXL2 SGDID:S000001402, Chr IX from 85366-87837, Verified ORF, Integral plasma membrane protein required for axial budding in haploid cells, localizes to the incipient bud site and bud neck; glycosylated by Pmt4p; potential Cdc28p substrate	1	129.761	3.3012e-06	129.76	No flanking Lys, ratio valid
162	59	163	YBR068C	BAP2	>YBR068C BAP2 SGDID:S000000272, Chr II from 375687-373858, reverse complement, Verified ORF, High-affinity leucine permease, functions as a branched-chain amino acid permease involved in the uptake of leucine, isoleucine and valine; contains 12 predicted	1	160.587	4.87615e-06	204.42	No flanking Lys, ratio valid
163	13	163	YBR068C	BAP2	>YBR068C BAP2 SGDID:S000000272, Chr II from 375687-373858, reverse complement, Verified ORF, High-affinity leucine permease, functions as a branched-chain amino acid permease involved in the uptake of leucine, isoleucine and valine; contains 12 predicted	1	95.7414	3.0822e-06	389.24	Known Flanking GlyGly site, ratio meaningless
164	12	163	YBR068C	BAP2	>YBR068C BAP2 SGDID:S000000272, Chr II from 375687-373858, reverse complement, Verified ORF, High-affinity leucine permease, functions as a branched-chain amino acid permease involved in the uptake of leucine, isoleucine and valine; contains 12 predicted	1	138.205	6.5143e-07	201.85	Known Flanking GlyGly site, ratio meaningless
165	38	163	YBR068C	BAP2	>YBR068C BAP2 SGDID:S000000272, Chr II from 375687-373858, reverse complement, Verified ORF, High-affinity leucine permease, functions as a branched-chain amino acid permease involved in the uptake of leucine, isoleucine and valine; contains 12 predicted	1	76.0677	4.83394e-05	284.74	No known flanking GlyGly site, ratio may be meaningful
443	78	419	YDR046C	BAP3	>YDR046C BAP3 SGDID:S000002453, Chr IV from 550575-548761, reverse complement, Verified ORF, Amino acid permease involved in the uptake of cysteine, leucine, isoleucine and valine	1	48.5269	0.00980007	48.527	No known flanking GlyGly site, ratio may be meaningful
444	10	419	YDR046C	BAP3	>YDR046C BAP3 SGDID:S000002453, Chr IV from 550575-548761, reverse complement, Verified ORF, Amino acid permease involved in the uptake of cysteine, leucine, isoleucine and valine	1	121.048	2.4744e-18	194.2	No known flanking GlyGly site, ratio may be meaningful
1068	499	1095	YJL020C	BBC1	>YJL020C BBC1 SGDID:S000003557, Chr X from 402405-398932, reverse complement, Verified ORF, Protein possibly involved in assembly of actin patches; interacts with an actin assembly factor Las17p and with the SH3 domains of Type I myosins Myo3p and Myo5p;	0.999816	37.356	3.12131e-06	152.06	No known flanking GlyGly site, ratio may be meaningful
1069	858	1095	YJL020C	BBC1	>YJL020C BBC1 SGDID:S000003557, Chr X from 402405-398932, reverse complement, Verified ORF, Protein possibly involved in assembly of actin patches; interacts with an actin assembly factor Las17p and with the SH3 domains of Type I myosins Myo3p and Myo5p;	1	87.0829	0.0814156	87.083	No flanking Lys, ratio valid		1.04542		1.04542
1027	304	1032	YIL033C	BCY1	>YIL033C BCY1 SGDID:S000001295, Chr IX from 291668-290418, reverse complement, Verified ORF, Regulatory subunit of the cyclic AMP-dependent protein kinase (PKA), a component of a signaling pathway that controls a variety of cellular processes, including m	1	56.6322	0.00874271	70.889	No known flanking GlyGly site, ratio may be meaningful	1.32083			1.32083
1241	185	1320	YKR068C	BET3	>YKR068C BET3 SGDID:S000001776, Chr XI from 570551-569970, reverse complement, Verified ORF, Hydrophilic protein that acts in conjunction with SNARE proteins in targeting and fusion of ER to Golgi transport vesicles; component of the TRAPP (transport prot	1	67.2517	0.0168883	67.252	No flanking Lys, ratio valid
688	145	686	YER177W	BMH1	>YER177W BMH1 SGDID:S000000979, Chr V from 545606-546409, Verified ORF, 14-3-3 protein, major isoform; controls proteome at post-transcriptional level, binds proteins and DNA, involved in regulation of many processes including exocytosis, vesicle transpor	1	244.611	1.00045e-05	244.61	No known flanking GlyGly site, ratio may be meaningful	0.87877			0.87877
467	76	436	YDR099W	BMH2	>YDR099W BMH2 SGDID:S000002506, Chr IV from 653605-654426, Verified ORF, 14-3-3 protein, minor isoform; controls proteome at post-transcriptional level, binds proteins and DNA, involved in regulation of many processes including exocytosis, vesicle transpo	1	117.399	0.000647863	117.4	No known flanking GlyGly site, ratio may be meaningful	0.977251			0.977251
468	51;51	436;686	YDR099W;YER177W	BMH2	>YDR099W BMH2 SGDID:S000002506, Chr IV from 653605-654426, Verified ORF, 14-3-3 protein, minor isoform; controls proteome at post-transcriptional level, binds proteins and DNA, involved in regulation of many processes including exocytosis, vesicle transpo	1	252.725	6.01001e-07	252.72	No flanking Lys, ratio valid	0.835371	0.661824	0.974796	0.813789
1117	60	1172	YJR025C	BNA1	>YJR025C BNA1 SGDID:S000003786, Chr X from 471664-471131, reverse complement, Verified ORF, 3-hydroxyanthranilic acid dioxygenase, required for the de novo biosynthesis of NAD from tryptophan via kynurenine; expression regulated by Hst1p	1	70.8885	0.00549105	70.889	No known flanking GlyGly site, ratio may be meaningful	1.1462			1.1462
1623	400	1736	YNL166C	BNI5	>YNL166C BNI5 SGDID:S000005110, Chr XIV from 323567-322221, reverse complement, Verified ORF, Protein involved in organization of septins at the mother-bud neck, may interact directly with the Cdc11p septin, localizes to bud neck in a septin-dependent man	1	79.8855	0.00390922	79.885	No known flanking GlyGly site, ratio may be meaningful
123	521	132	YBL085W	BOI1	>YBL085W BOI1 SGDID:S000000181, Chr II from 63873-66815, Verified ORF, Protein implicated in polar growth, functionally redundant with Boi2p; interacts with bud-emergence protein Bem1p; contains an SH3 (src homology 3) domain and a PH (pleckstrin homology	1	130.039	0.00289067	130.04	No flanking Lys, ratio valid
124	10	132	YBL085W	BOI1	>YBL085W BOI1 SGDID:S000000181, Chr II from 63873-66815, Verified ORF, Protein implicated in polar growth, functionally redundant with Boi2p; interacts with bud-emergence protein Bem1p; contains an SH3 (src homology 3) domain and a PH (pleckstrin homology	1	87.6673	0.000822958	87.667	No known flanking GlyGly site, ratio may be meaningful
1248	242	1332	YLL015W	BPT1	>YLL015W BPT1 SGDID:S000003938, Chr XII from 116431-121110, Verified ORF, ABC type transmembrane transporter of MRP/CFTR family, found in vacuolar membrane, involved in the transport of unconjugated bilirubin and in heavy metal detoxification via glutathi	1	77.5969	0.0011838	77.597	Known Flanking GlyGly site, ratio meaningless
1249	244	1332	YLL015W	BPT1	>YLL015W BPT1 SGDID:S000003938, Chr XII from 116431-121110, Verified ORF, ABC type transmembrane transporter of MRP/CFTR family, found in vacuolar membrane, involved in the transport of unconjugated bilirubin and in heavy metal detoxification via glutathi	1	77.5969	0.0011838	77.597	Known Flanking GlyGly site, ratio meaningless
1695	6	1835	YOL077C	BRX1	>YOL077C BRX1 SGDID:S000005437, Chr XV from 186723-185848, reverse complement, Verified ORF, Nucleolar protein, constituent of 66S pre-ribosomal particles; depletion leads to defects in rRNA processing and a block in the assembly of large ribosomal subuni	1	117.526	0.000121513	117.53	No known flanking GlyGly site, ratio may be meaningful		0.860417		0.860417
88	4	96	YAR014C	BUD14	>YAR014C BUD14 SGDID:S000000069, Chr I from 168866-166743, reverse complement, Verified ORF, Protein involved in bud-site selection, Bud14p-Glc7p complex functions as a cortical regulator of dynein; diploid mutants display a random budding pattern instead	1	79.3174	0.00131311	79.317	No known flanking GlyGly site, ratio may be meaningful	1.19338			1.19338
708	622	701	YFL023W	BUD27	>YFL023W BUD27 SGDID:S000001871, Chr VI from 90984-93374, Verified ORF, Protein involved in bud-site selection, nutrient signaling, and gene expression controlled by TOR kinase; diploid mutants show a random budding pattern rather than the wild-type bipol	1	70.3345	0.00281715	72.096	No flanking Lys, ratio valid
256	774	247	YCL014W	BUD3	>YCL014W BUD3 SGDID:S000000520, Chr III from 96281-101191, Verified ORF, Protein involved in bud-site selection and required for axial budding pattern; localizes with septins to bud neck in mitosis and may constitute an axial landmark for next round of bu	0.999746	35.9534	0.000231904	208.17	Known Flanking GlyGly site, ratio meaningless
257	775	247	YCL014W	BUD3	>YCL014W BUD3 SGDID:S000000520, Chr III from 96281-101191, Verified ORF, Protein involved in bud-site selection and required for axial budding pattern; localizes with septins to bud neck in mitosis and may constitute an axial landmark for next round of bu	0.972626	15.5061	0.000231904	206.46	Known Flanking GlyGly site, ratio meaningless
1550	558	1651	YMR275C	BUL1	>YMR275C BUL1 SGDID:S000004888, Chr XIII from 818580-815650, reverse complement, Verified ORF, Ubiquitin-binding component of the Rsp5p E3-ubiquitin ligase complex, functional homolog of Bul2p, disruption causes temperature-sensitive growth, overexpressio	1	194.937	5.45885e-23	209.87	Known Flanking GlyGly site, ratio meaningless
1551	565	1651	YMR275C	BUL1	>YMR275C BUL1 SGDID:S000004888, Chr XIII from 818580-815650, reverse complement, Verified ORF, Ubiquitin-binding component of the Rsp5p E3-ubiquitin ligase complex, functional homolog of Bul2p, disruption causes temperature-sensitive growth, overexpressio	1	194.937	0.000217552	194.94	Known Flanking GlyGly site, ratio meaningless
1552	578	1651	YMR275C	BUL1	>YMR275C BUL1 SGDID:S000004888, Chr XIII from 818580-815650, reverse complement, Verified ORF, Ubiquitin-binding component of the Rsp5p E3-ubiquitin ligase complex, functional homolog of Bul2p, disruption causes temperature-sensitive growth, overexpressio	1	61.6572	0.000311726	305.19	No flanking Lys, ratio valid
1443	563	1537	YML111W	BUL2	>YML111W BUL2 SGDID:S000004579, Chr XIII from 46942-49704, Verified ORF, Component of the Rsp5p E3-ubiquitin ligase complex, involved in intracellular amino acid permease sorting, functions in heat shock element mediated gene expression, essential for gro	1	227.092	1.95346e-05	352.64	No known flanking GlyGly site, ratio may be meaningful
1444	540	1537	YML111W	BUL2	>YML111W BUL2 SGDID:S000004579, Chr XIII from 46942-49704, Verified ORF, Component of the Rsp5p E3-ubiquitin ligase complex, involved in intracellular amino acid permease sorting, functions in heat shock element mediated gene expression, essential for gro	1	121.287	3.5024e-09	241.03	No flanking Lys, ratio valid
999	350	991	YHR114W	BZZ1	>YHR114W BZZ1 SGDID:S000001156, Chr VIII from 338086-339987, Verified ORF, SH3 domain protein implicated in the regulation of actin polymerization, able to recruit actin polymerization machinery through its SH3 domains, colocalizes with cortical actin pat	0.999908	40.3619	0.0206017	68.329	No known flanking GlyGly site, ratio may be meaningful	0.441464			0.441464
611	42	599	YEL063C	CAN1	>YEL063C CAN1 SGDID:S000000789, Chr V from 33466-31694, reverse complement, Verified ORF, Plasma membrane arginine permease, requires phosphatidyl ethanolamine (PE) for localization, exclusively associated with lipid rafts; mutation confers canavanine res	1	124.599	2.23393e-16	214.96	Known Flanking GlyGly site, ratio meaningless
612	45	599	YEL063C	CAN1	>YEL063C CAN1 SGDID:S000000789, Chr V from 33466-31694, reverse complement, Verified ORF, Plasma membrane arginine permease, requires phosphatidyl ethanolamine (PE) for localization, exclusively associated with lipid rafts; mutation confers canavanine res	1	104.629	2.39363e-11	203.57	Known Flanking GlyGly site, ratio meaningless
613	47	599	YEL063C	CAN1	>YEL063C CAN1 SGDID:S000000789, Chr V from 33466-31694, reverse complement, Verified ORF, Plasma membrane arginine permease, requires phosphatidyl ethanolamine (PE) for localization, exclusively associated with lipid rafts; mutation confers canavanine res	1	86.8328	0.0018091	123.69	Known Flanking GlyGly site, ratio meaningless
614	5	599	YEL063C	CAN1	>YEL063C CAN1 SGDID:S000000789, Chr V from 33466-31694, reverse complement, Verified ORF, Plasma membrane arginine permease, requires phosphatidyl ethanolamine (PE) for localization, exclusively associated with lipid rafts; mutation confers canavanine res	1	291.223	6.13591e-47	291.22	No known flanking GlyGly site, ratio may be meaningful
1164	5	1221	YKL007W	CAP1	>YKL007W CAP1 SGDID:S000001490, Chr XI from 428945-429751, Verified ORF, Alpha subunit of the capping protein (CP) heterodimer (Cap1p and Cap2p) which binds to the barbed ends of actin filaments preventing further polymerization; localized predominantly t	1	126.709	5.18191e-05	126.71	No known flanking GlyGly site, ratio may be meaningful	0.349717			0.349717
1901	11	2023	YPL111W	CAR1	>YPL111W CAR1 SGDID:S000006032, Chr XVI from 339943-340944, Verified ORF, Arginase, responsible for arginine degradation, expression responds to both induction by arginine and nitrogen catabolite repression; disruption enhances freeze tolerance	1	56.3391	0.0283436	56.339	No flanking Lys, ratio valid	1.19745			1.19745
1136	317	1181	YJR060W	CBF1	>YJR060W CBF1 SGDID:S000003821, Chr X from 548752-549807, Verified ORF, Helix-loop-helix protein that binds the motif CACRTG, which is present at several sites including MET gene promoters and centromere DNA element I (CDEI); required for nucleosome posit	1	43.0662	6.0804e-39	43.066	No known flanking GlyGly site, ratio may be meaningful					20.0735		20.0735
1320	137	1393	YLR175W	CBF5	>YLR175W CBF5 SGDID:S000004165, Chr XII from 506136-507587, Verified ORF, Pseudouridine synthase catalytic subunit of box H/ACA small nucleolar ribonucleoprotein particles (snoRNPs), acts on both large and small rRNAs and on snRNA U2	0.896301	9.36681	0.0296281	74.165	No known flanking GlyGly site, ratio may be meaningful	0.551973			0.551973
1321	3	1393	YLR175W	CBF5	>YLR175W CBF5 SGDID:S000004165, Chr XII from 506136-507587, Verified ORF, Pseudouridine synthase catalytic subunit of box H/ACA small nucleolar ribonucleoprotein particles (snoRNPs), acts on both large and small rRNAs and on snRNA U2	0.999193	30.9302	0.00097828	78.757	No known flanking GlyGly site, ratio may be meaningful
1032	86	1038	YIL043C	CBR1	>YIL043C CBR1 SGDID:S000001305, Chr IX from 274925-274071, reverse complement, Verified ORF, Microsomal cytochrome b reductase, not essential for viability; also detected in mitochondria; mutation in conserved NADH binding domain of the human ortholog res	1	113.706	4.35651e-16	190.73	No known flanking GlyGly site, ratio may be meaningful	2.07801	1.34948	0.982378	1.40184	7.09009	1.98269	3.74932
1334	87	1411	YLR220W	CCC1	>YLR220W CCC1 SGDID:S000004210, Chr XII from 576827-577795, Verified ORF, Putative vacuolar Fe2+/Mn2+ transporter; suppresses respiratory deficit of yfh1 mutants, which lack the ortholog of mammalian frataxin, by preventing mitochondrial iron accumulation	1	178.234	0.000294835	178.23	No flanking Lys, ratio valid
1335	74	1411	YLR220W	CCC1	>YLR220W CCC1 SGDID:S000004210, Chr XII from 576827-577795, Verified ORF, Putative vacuolar Fe2+/Mn2+ transporter; suppresses respiratory deficit of yfh1 mutants, which lack the ortholog of mammalian frataxin, by preventing mitochondrial iron accumulation	1	110.64	1.73595e-06	384.73	No flanking Lys, ratio valid
1045	425	1071	YIL142W	CCT2	>YIL142W CCT2 SGDID:S000001404, Chr IX from 83302-84885, Verified ORF, Subunit beta of the cytosolic chaperonin Cct ring complex, related to Tcp1p, required for the assembly of actin and tubulins in vivo	1	244.71	6.23394e-08	252.49	No known flanking GlyGly site, ratio may be meaningful	0.829198	0.707428	0.682379	0.73698
1046	75	1071	YIL142W	CCT2	>YIL142W CCT2 SGDID:S000001404, Chr IX from 83302-84885, Verified ORF, Subunit beta of the cytosolic chaperonin Cct ring complex, related to Tcp1p, required for the assembly of actin and tubulins in vivo	1	96.7555	0.00093297	96.756	No known flanking GlyGly site, ratio may be meaningful	0.804592		1.06271	0.924689
383	4	362	YDL143W	CCT4	>YDL143W CCT4 SGDID:S000002302, Chr IV from 199997-201583, Verified ORF, Subunit of the cytosolic chaperonin Cct ring complex, related to Tcp1p, required for the assembly of actin and tubulins in vivo	1	62.6939	0.00392093	62.694	No known flanking GlyGly site, ratio may be meaningful	0.682235			0.682235
384	42	362	YDL143W	CCT4	>YDL143W CCT4 SGDID:S000002302, Chr IV from 199997-201583, Verified ORF, Subunit of the cytosolic chaperonin Cct ring complex, related to Tcp1p, required for the assembly of actin and tubulins in vivo	1	96.1904	0.000758222	96.19	No known flanking GlyGly site, ratio may be meaningful		0.537354		0.537354
496	542	467	YDR188W	CCT6	>YDR188W CCT6 SGDID:S000002596, Chr IV from 836419-838059, Verified ORF, Subunit of the cytosolic chaperonin Cct ring complex, related to Tcp1p, essential protein that is required for the assembly of actin and tubulins in vivo; contains an ATP-binding mot	1	72.2432	0.0434356	78.548	No flanking Lys, ratio valid		0.586822	1.01829	0.773017	0.9284	0.564311	0.723814
1065	15	1091	YJL008C	CCT8	>YJL008C CCT8 SGDID:S000003545, Chr X from 421657-419951, reverse complement, Verified ORF, Subunit of the cytosolic chaperonin Cct ring complex, related to Tcp1p, required for the assembly of actin and tubulins in vivo	1	60.5268	0.00869518	60.527	No known flanking GlyGly site, ratio may be meaningful	0.982227			0.982227
495	446	465	YDR182W	CDC1	>YDR182W CDC1 SGDID:S000002590, Chr IV from 827580-829055, Verified ORF, Putative membrane protein of unknown function involved in Mn2+ homeostasis; mutants display actin and general growth defects, heterogeneous cell cycle arrests, and pleiotropic defect	1	68.0237	0.00114327	68.024	No known flanking GlyGly site, ratio may be meaningful
994	390	987	YHR107C	CDC12	>YHR107C CDC12 SGDID:S000001149, Chr VIII from 328039-326816, reverse complement, Verified ORF, Component of the septin ring of the mother-bud neck that is required for cytokinesis; septins recruit proteins to the neck and can act as a barrier to diffusio	0.644962	2.5926	0.0313736	107.79	Known Flanking GlyGly site, ratio meaningless
995	391	987	YHR107C	CDC12	>YHR107C CDC12 SGDID:S000001149, Chr VIII from 328039-326816, reverse complement, Verified ORF, Component of the septin ring of the mother-bud neck that is required for cytokinesis; septins recruit proteins to the neck and can act as a barrier to diffusio	0.98403	17.8971	0.0535907	84.817	Known Flanking GlyGly site, ratio meaningless
61	172	81	YAL038W	CDC19	>YAL038W CDC19 SGDID:S000000036, Chr I from 71787-73289, Verified ORF, Pyruvate kinase, functions as a homotetramer in glycolysis to convert phosphoenolpyruvate to pyruvate, the input for aerobic (TCA cycle) or anaerobic (glucose fermentation) respiration	1	57.1739	0.00045903	128.57	No known flanking GlyGly site, ratio may be meaningful	1.1801	1.08465	1.05425	1.10505
62	233	81	YAL038W	CDC19	>YAL038W CDC19 SGDID:S000000036, Chr I from 71787-73289, Verified ORF, Pyruvate kinase, functions as a homotetramer in glycolysis to convert phosphoenolpyruvate to pyruvate, the input for aerobic (TCA cycle) or anaerobic (glucose fermentation) respiration	1	77.7442	0.00533057	77.744	No known flanking GlyGly site, ratio may be meaningful	0.888944			0.888944
63	446	81	YAL038W	CDC19	>YAL038W CDC19 SGDID:S000000036, Chr I from 71787-73289, Verified ORF, Pyruvate kinase, functions as a homotetramer in glycolysis to convert phosphoenolpyruvate to pyruvate, the input for aerobic (TCA cycle) or anaerobic (glucose fermentation) respiration	1	100.588	0.000284985	100.59	No flanking Lys, ratio valid	1.10007			1.10007
64	466	81	YAL038W	CDC19	>YAL038W CDC19 SGDID:S000000036, Chr I from 71787-73289, Verified ORF, Pyruvate kinase, functions as a homotetramer in glycolysis to convert phosphoenolpyruvate to pyruvate, the input for aerobic (TCA cycle) or anaerobic (glucose fermentation) respiration	1	166.679	0.000243071	224.67	Known Flanking GlyGly site, ratio meaningless
65	468	81	YAL038W	CDC19	>YAL038W CDC19 SGDID:S000000036, Chr I from 71787-73289, Verified ORF, Pyruvate kinase, functions as a homotetramer in glycolysis to convert phosphoenolpyruvate to pyruvate, the input for aerobic (TCA cycle) or anaerobic (glucose fermentation) respiration	0.888827	9.02818	0.000292425	136.33	Known Flanking GlyGly site, ratio meaningless
66	475	81	YAL038W	CDC19	>YAL038W CDC19 SGDID:S000000036, Chr I from 71787-73289, Verified ORF, Pyruvate kinase, functions as a homotetramer in glycolysis to convert phosphoenolpyruvate to pyruvate, the input for aerobic (TCA cycle) or anaerobic (glucose fermentation) respiration	1	237.813	1.95004e-05	237.81	No known flanking GlyGly site, ratio may be meaningful	1.00067		0.749098	0.865793
67	413	81	YAL038W	CDC19	>YAL038W CDC19 SGDID:S000000036, Chr I from 71787-73289, Verified ORF, Pyruvate kinase, functions as a homotetramer in glycolysis to convert phosphoenolpyruvate to pyruvate, the input for aerobic (TCA cycle) or anaerobic (glucose fermentation) respiration	1	43.5023	0.0651869	43.502	No flanking Lys, ratio valid	0.775665	0.711241	0.841044	0.77417
68	135	81	YAL038W	CDC19	>YAL038W CDC19 SGDID:S000000036, Chr I from 71787-73289, Verified ORF, Pyruvate kinase, functions as a homotetramer in glycolysis to convert phosphoenolpyruvate to pyruvate, the input for aerobic (TCA cycle) or anaerobic (glucose fermentation) respiration	1	139.28	0.000666788	139.28	No known flanking GlyGly site, ratio may be meaningful	1.01574	0.911288	1.23808	1.04648
69	30	81	YAL038W	CDC19	>YAL038W CDC19 SGDID:S000000036, Chr I from 71787-73289, Verified ORF, Pyruvate kinase, functions as a homotetramer in glycolysis to convert phosphoenolpyruvate to pyruvate, the input for aerobic (TCA cycle) or anaerobic (glucose fermentation) respiration	1	89.46	5.25969e-05	89.46	No flanking Lys, ratio valid	1.23457			1.23457
70	85	82	YAL041W	CDC24	>YAL041W CDC24 SGDID:S000000039, Chr I from 62841-65405, Verified ORF, Guanine nucleotide exchange factor (GEF or GDP-release factor) for Cdc42p; required for polarity establishment and maintenance, and mutants have morphological defects in bud formation	1	71.2212	0.0044054	71.221	No known flanking GlyGly site, ratio may be meaningful
216	9	201	YBR160W	CDC28	>YBR160W CDC28 SGDID:S000000364, Chr II from 560072-560968, Verified ORF, Catalytic subunit of the main cell cycle cyclin-dependent kinase (CDK); alternately associates with G1 cyclins (CLNs) and G2/M cyclins (CLBs) which direct the CDK to specific substr	1	68.8461	0.0208588	68.846	No flanking Lys, ratio valid
1368	4	1443	YLR314C	CDC3	>YLR314C CDC3 SGDID:S000004306, Chr XII from 764137-762575, reverse complement, Verified ORF, Component of the septin ring of the mother-bud neck that is required for cytokinesis; septins recruit proteins to the neck and can act as a barrier to diffusion	1	163.839	1.33373e-12	163.84	Known Flanking GlyGly site, ratio meaningless
1369	11	1443	YLR314C	CDC3	>YLR314C CDC3 SGDID:S000004306, Chr XII from 764137-762575, reverse complement, Verified ORF, Component of the septin ring of the mother-bud neck that is required for cytokinesis; septins recruit proteins to the neck and can act as a barrier to diffusion	0.998086	27.1714	0.0144775	126.56	Known Flanking GlyGly site, ratio meaningless
1736	111	1855	YOL139C	CDC33	>YOL139C CDC33 SGDID:S000005499, Chr XV from 61024-60383, reverse complement, Verified ORF, Cytoplasmic mRNA cap binding protein; the eIF4E-cap complex is responsible for mediating cap-dependent mRNA translation via interactions with the translation initi	1	122.08	0.000320225	162.64	No known flanking GlyGly site, ratio may be meaningful	0.401599			0.401599
1737	8	1855	YOL139C	CDC33	>YOL139C CDC33 SGDID:S000005499, Chr XV from 61024-60383, reverse complement, Verified ORF, Cytoplasmic mRNA cap binding protein; the eIF4E-cap complex is responsible for mediating cap-dependent mRNA translation via interactions with the translation initi	0.977604	16.4	1.56025e-05	172.37	Known Flanking GlyGly site, ratio meaningless
1738	9	1855	YOL139C	CDC33	>YOL139C CDC33 SGDID:S000005499, Chr XV from 61024-60383, reverse complement, Verified ORF, Cytoplasmic mRNA cap binding protein; the eIF4E-cap complex is responsible for mediating cap-dependent mRNA translation via interactions with the translation initi	0.930468	11.2652	3.35709e-06	188.48	Known Flanking GlyGly site, ratio meaningless
389	3	369	YDL165W	CDC36	>YDL165W CDC36 SGDID:S000002324, Chr IV from 164291-164866, Verified ORF, Component of the CCR4-NOT complex, which has multiple roles in regulating mRNA levels including regulation of transcription and destabilizing mRNAs by deadenylation; basal transcrip	1	77.3176	0.00232506	101.33	No known flanking GlyGly site, ratio may be meaningful
320	1329	300	YCR093W	CDC39	>YCR093W CDC39 SGDID:S000000689, Chr III from 280114-286440, Verified ORF, Component of the CCR4-NOT complex, which has multiple roles in regulating mRNA levels including regulation of transcription and destabilizing mRNAs by deadenylation; basal transcri	1	78.964	0.013937	78.964	No flanking Lys, ratio valid
692	202	692	YFL009W	CDC4	>YFL009W CDC4 SGDID:S000001885, Chr VI from 116139-118478, Verified ORF, F-box protein required for G1/S and G2/M transition, associates with Skp1p and Cdc53p to form a complex, SCFCdc4, which acts as ubiquitin-protein ligase directing ubiquitination of t	1	180.565	0.00151779	180.56	No known flanking GlyGly site, ratio may be meaningful
353	594	352	YDL126C	CDC48	>YDL126C CDC48 SGDID:S000002284, Chr IV from 238664-236157, reverse complement, Verified ORF, ATPase in ER, nuclear membrane and cytosol with homology to mammalian p97; in a complex with Npl4p and Ufd1p participates in retrotranslocation of ubiquitinated	1	272.352	1.53647e-07	272.35	No flanking Lys, ratio valid
354	246	352	YDL126C	CDC48	>YDL126C CDC48 SGDID:S000002284, Chr IV from 238664-236157, reverse complement, Verified ORF, ATPase in ER, nuclear membrane and cytosol with homology to mammalian p97; in a complex with Npl4p and Ufd1p participates in retrotranslocation of ubiquitinated	1	97.0734	8.11496e-05	97.073	No known flanking GlyGly site, ratio may be meaningful	0.910253	0.673796	0.598858	0.716151
355	261	352	YDL126C	CDC48	>YDL126C CDC48 SGDID:S000002284, Chr IV from 238664-236157, reverse complement, Verified ORF, ATPase in ER, nuclear membrane and cytosol with homology to mammalian p97; in a complex with Npl4p and Ufd1p participates in retrotranslocation of ubiquitinated	1	94.7673	5.1291e-05	127.51	No flanking Lys, ratio valid	0.836292			0.836292
356	763	352	YDL126C	CDC48	>YDL126C CDC48 SGDID:S000002284, Chr IV from 238664-236157, reverse complement, Verified ORF, ATPase in ER, nuclear membrane and cytosol with homology to mammalian p97; in a complex with Npl4p and Ufd1p participates in retrotranslocation of ubiquitinated	1	138.205	0.000177674	202	No known flanking GlyGly site, ratio may be meaningful	0.572849			0.572849
357	522	352	YDL126C	CDC48	>YDL126C CDC48 SGDID:S000002284, Chr IV from 238664-236157, reverse complement, Verified ORF, ATPase in ER, nuclear membrane and cytosol with homology to mammalian p97; in a complex with Npl4p and Ufd1p participates in retrotranslocation of ubiquitinated	1	214.67	1.75408e-19	330.13	Known Flanking GlyGly site, ratio meaningless
358	534	352	YDL126C	CDC48	>YDL126C CDC48 SGDID:S000002284, Chr IV from 238664-236157, reverse complement, Verified ORF, ATPase in ER, nuclear membrane and cytosol with homology to mammalian p97; in a complex with Npl4p and Ufd1p participates in retrotranslocation of ubiquitinated	1	180.063	7.46395e-09	244.23	Known Flanking GlyGly site, ratio meaningless
359	6	352	YDL126C	CDC48	>YDL126C CDC48 SGDID:S000002284, Chr IV from 238664-236157, reverse complement, Verified ORF, ATPase in ER, nuclear membrane and cytosol with homology to mammalian p97; in a complex with Npl4p and Ufd1p participates in retrotranslocation of ubiquitinated	1	138.205	0.000724537	138.2	No flanking Lys, ratio valid	0.714343			0.714343
360	624	352	YDL126C	CDC48	>YDL126C CDC48 SGDID:S000002284, Chr IV from 238664-236157, reverse complement, Verified ORF, ATPase in ER, nuclear membrane and cytosol with homology to mammalian p97; in a complex with Npl4p and Ufd1p participates in retrotranslocation of ubiquitinated	1	283.049	1.48023e-05	360.11	No known flanking GlyGly site, ratio may be meaningful	0.618971			0.618971
361	158	352	YDL126C	CDC48	>YDL126C CDC48 SGDID:S000002284, Chr IV from 238664-236157, reverse complement, Verified ORF, ATPase in ER, nuclear membrane and cytosol with homology to mammalian p97; in a complex with Npl4p and Ufd1p participates in retrotranslocation of ubiquitinated	1	109.83	0.00906052	120.27	No flanking Lys, ratio valid	0.665308	0.185256		0.351073
362	221	352	YDL126C	CDC48	>YDL126C CDC48 SGDID:S000002284, Chr IV from 238664-236157, reverse complement, Verified ORF, ATPase in ER, nuclear membrane and cytosol with homology to mammalian p97; in a complex with Npl4p and Ufd1p participates in retrotranslocation of ubiquitinated	1	98.6294	0.0479791	98.629	No flanking Lys, ratio valid
363	673	352	YDL126C	CDC48	>YDL126C CDC48 SGDID:S000002284, Chr IV from 238664-236157, reverse complement, Verified ORF, ATPase in ER, nuclear membrane and cytosol with homology to mammalian p97; in a complex with Npl4p and Ufd1p participates in retrotranslocation of ubiquitinated	1	154.85	0.000841484	154.85	No known flanking GlyGly site, ratio may be meaningful	0.448518	0.412317	0.917069	0.553526
364	119	352	YDL126C	CDC48	>YDL126C CDC48 SGDID:S000002284, Chr IV from 238664-236157, reverse complement, Verified ORF, ATPase in ER, nuclear membrane and cytosol with homology to mammalian p97; in a complex with Npl4p and Ufd1p participates in retrotranslocation of ubiquitinated	1	71.98	0.00149141	75.316	No flanking Lys, ratio valid	1.06983	0.96504	0.908226	0.978779
365	785	352	YDL126C	CDC48	>YDL126C CDC48 SGDID:S000002284, Chr IV from 238664-236157, reverse complement, Verified ORF, ATPase in ER, nuclear membrane and cytosol with homology to mammalian p97; in a complex with Npl4p and Ufd1p participates in retrotranslocation of ubiquitinated	1	153.341	9.46548e-81	403.18	No flanking Lys, ratio valid	0.679128	0.5311	1.01215	0.714701	1.34065	0.472089	0.795555
366	346	352	YDL126C	CDC48	>YDL126C CDC48 SGDID:S000002284, Chr IV from 238664-236157, reverse complement, Verified ORF, ATPase in ER, nuclear membrane and cytosol with homology to mammalian p97; in a complex with Npl4p and Ufd1p participates in retrotranslocation of ubiquitinated	1	227.364	5.11389e-05	270.06	No flanking Lys, ratio valid	1.14135	0.881347	0.853982	0.950616
367	710	352	YDL126C	CDC48	>YDL126C CDC48 SGDID:S000002284, Chr IV from 238664-236157, reverse complement, Verified ORF, ATPase in ER, nuclear membrane and cytosol with homology to mammalian p97; in a complex with Npl4p and Ufd1p participates in retrotranslocation of ubiquitinated	1	72.2905	0.0345807	72.29	No known flanking GlyGly site, ratio may be meaningful	0.352328			0.352328
331	429	310	YDL017W	CDC7	>YDL017W CDC7 SGDID:S000002175, Chr IV from 424207-425730, Verified ORF, DDK (Dbf4-dependent kinase) catalytic subunit required for firing origins and replication fork progression in mitosis through phosphorylation of Mcm2-7p complexes and Cdc45p; kinase	1	74.165	0.000969816	104.01	No known flanking GlyGly site, ratio may be meaningful
388	340	368	YDL164C	CDC9	>YDL164C CDC9 SGDID:S000002323, Chr IV from 167255-164988, reverse complement, Verified ORF, DNA ligase found in the nucleus and mitochondria, an essential enzyme that joins Okazaki fragments during DNA replication; also acts in nucleotide excision repair	1	65.2948	0.00810039	65.295	No known flanking GlyGly site, ratio may be meaningful
800	947	802	YGL206C	CHC1	>YGL206C CHC1 SGDID:S000003174, Chr VII from 107508-102547, reverse complement, Verified ORF, Clathrin heavy chain, subunit of the major coat protein involved in intracellular protein transport and endocytosis; two heavy chains form the clathrin triskelio	1	207.949	5.99762e-05	220.32	No flanking Lys, ratio valid	0.683938			0.683938
876	513	869	YGR157W	CHO2	>YGR157W CHO2 SGDID:S000003389, Chr VII from 802445-805054, Verified ORF, Phosphatidylethanolamine methyltransferase (PEMT), catalyzes the first step in the conversion of phosphatidylethanolamine to phosphatidylcholine during the methylation pathway of ph	1	136.989	0.00115726	136.99	No flanking Lys, ratio valid	0.0805557			0.0805557
877	617	869	YGR157W	CHO2	>YGR157W CHO2 SGDID:S000003389, Chr VII from 802445-805054, Verified ORF, Phosphatidylethanolamine methyltransferase (PEMT), catalyzes the first step in the conversion of phosphatidylethanolamine to phosphatidylcholine during the methylation pathway of ph	1	127.199	0.000309795	127.2	No known flanking GlyGly site, ratio may be meaningful
878	36	869	YGR157W	CHO2	>YGR157W CHO2 SGDID:S000003389, Chr VII from 802445-805054, Verified ORF, Phosphatidylethanolamine methyltransferase (PEMT), catalyzes the first step in the conversion of phosphatidylethanolamine to phosphatidylcholine during the methylation pathway of ph	1	61.4953	0.0722761	61.495	No flanking Lys, ratio valid	0.143889			0.143889
879	592	869	YGR157W	CHO2	>YGR157W CHO2 SGDID:S000003389, Chr VII from 802445-805054, Verified ORF, Phosphatidylethanolamine methyltransferase (PEMT), catalyzes the first step in the conversion of phosphatidylethanolamine to phosphatidylcholine during the methylation pathway of ph	1	111.739	0.0084549	138.54	Known Flanking GlyGly site, ratio meaningless
880	17	869	YGR157W	CHO2	>YGR157W CHO2 SGDID:S000003389, Chr VII from 802445-805054, Verified ORF, Phosphatidylethanolamine methyltransferase (PEMT), catalyzes the first step in the conversion of phosphatidylethanolamine to phosphatidylcholine during the methylation pathway of ph	1	112.423	0.000866373	112.42	No known flanking GlyGly site, ratio may be meaningful	0.11921			0.11921
881	586	869	YGR157W	CHO2	>YGR157W CHO2 SGDID:S000003389, Chr VII from 802445-805054, Verified ORF, Phosphatidylethanolamine methyltransferase (PEMT), catalyzes the first step in the conversion of phosphatidylethanolamine to phosphatidylcholine during the methylation pathway of ph	1	65.2664	0.000431877	155.14	Known Flanking GlyGly site, ratio meaningless
143	515	148	YBR023C	CHS3	>YBR023C CHS3 SGDID:S000000227, Chr II from 287925-284428, reverse complement, Verified ORF, Chitin synthase III, catalyzes the transfer of N-acetylglucosamine (GlcNAc) to chitin; required for synthesis of the majority of cell wall chitin, the chitin ring	1	76.8677	0.00184196	113.66	No known flanking GlyGly site, ratio may be meaningful
144	543	148	YBR023C	CHS3	>YBR023C CHS3 SGDID:S000000227, Chr II from 287925-284428, reverse complement, Verified ORF, Chitin synthase III, catalyzes the transfer of N-acetylglucosamine (GlcNAc) to chitin; required for synthesis of the majority of cell wall chitin, the chitin ring	1	67.032	0.000717306	127.46	No known flanking GlyGly site, ratio may be meaningful
145	118	148	YBR023C	CHS3	>YBR023C CHS3 SGDID:S000000227, Chr II from 287925-284428, reverse complement, Verified ORF, Chitin synthase III, catalyzes the transfer of N-acetylglucosamine (GlcNAc) to chitin; required for synthesis of the majority of cell wall chitin, the chitin ring	1	304.862	1.96863e-08	387.96	Known Flanking GlyGly site, ratio meaningless
146	119	148	YBR023C	CHS3	>YBR023C CHS3 SGDID:S000000227, Chr II from 287925-284428, reverse complement, Verified ORF, Chitin synthase III, catalyzes the transfer of N-acetylglucosamine (GlcNAc) to chitin; required for synthesis of the majority of cell wall chitin, the chitin ring	0.999913	40.6044	0.00057029	224.12	Known Flanking GlyGly site, ratio meaningless
147	1125	148	YBR023C	CHS3	>YBR023C CHS3 SGDID:S000000227, Chr II from 287925-284428, reverse complement, Verified ORF, Chitin synthase III, catalyzes the transfer of N-acetylglucosamine (GlcNAc) to chitin; required for synthesis of the majority of cell wall chitin, the chitin ring	0.807119	6.21648	0.000322085	113.23	Known Flanking GlyGly site, ratio meaningless
148	1126	148	YBR023C	CHS3	>YBR023C CHS3 SGDID:S000000227, Chr II from 287925-284428, reverse complement, Verified ORF, Chitin synthase III, catalyzes the transfer of N-acetylglucosamine (GlcNAc) to chitin; required for synthesis of the majority of cell wall chitin, the chitin ring	0.996164	24.145	2.91304e-05	178.22	Known Flanking GlyGly site, ratio meaningless
1753	284	1872	YOR028C	CIN5	>YOR028C CIN5 SGDID:S000005554, Chr XV from 384420-383533, reverse complement, Verified ORF, Basic leucine zipper transcriptional factor of the yAP-1 family that mediates pleiotropic drug resistance and salt tolerance; localizes constitutively to the nucl	1	98.6294	0.0166346	98.629	No known flanking GlyGly site, ratio may be meaningful
284	442	271	YCR005C	CIT2	>YCR005C CIT2 SGDID:S000000598, Chr III from 122326-120944, reverse complement, Verified ORF, Citrate synthase, catalyzes the condensation of acetyl coenzyme A and oxaloacetate to form citrate, peroxisomal isozyme involved in glyoxylate cycle; expression	1	136.932	0.00338765	136.93	Known Flanking GlyGly site, ratio meaningless
285	448	271	YCR005C	CIT2	>YCR005C CIT2 SGDID:S000000598, Chr III from 122326-120944, reverse complement, Verified ORF, Citrate synthase, catalyzes the condensation of acetyl coenzyme A and oxaloacetate to form citrate, peroxisomal isozyme involved in glyoxylate cycle; expression	0.993037	21.5419	0.00272939	109.11	Known Flanking GlyGly site, ratio meaningless
286	218	271	YCR005C	CIT2	>YCR005C CIT2 SGDID:S000000598, Chr III from 122326-120944, reverse complement, Verified ORF, Citrate synthase, catalyzes the condensation of acetyl coenzyme A and oxaloacetate to form citrate, peroxisomal isozyme involved in glyoxylate cycle; expression	1	84.3649	0.000130046	251.56	No known flanking GlyGly site, ratio may be meaningful	0.680426			0.680426
287	454	271	YCR005C	CIT2	>YCR005C CIT2 SGDID:S000000598, Chr III from 122326-120944, reverse complement, Verified ORF, Citrate synthase, catalyzes the condensation of acetyl coenzyme A and oxaloacetate to form citrate, peroxisomal isozyme involved in glyoxylate cycle; expression	1	84.9691	2.5348e-16	346.55	No known flanking GlyGly site, ratio may be meaningful	1.23034	1.01839	1.18965	1.14231
288	176	271	YCR005C	CIT2	>YCR005C CIT2 SGDID:S000000598, Chr III from 122326-120944, reverse complement, Verified ORF, Citrate synthase, catalyzes the condensation of acetyl coenzyme A and oxaloacetate to form citrate, peroxisomal isozyme involved in glyoxylate cycle; expression	1	242.495	0.00154985	242.49	No known flanking GlyGly site, ratio may be meaningful	0.570283		0.578307	0.574281
289	239	271	YCR005C	CIT2	>YCR005C CIT2 SGDID:S000000598, Chr III from 122326-120944, reverse complement, Verified ORF, Citrate synthase, catalyzes the condensation of acetyl coenzyme A and oxaloacetate to form citrate, peroxisomal isozyme involved in glyoxylate cycle; expression	1	201.903	0.000542413	210.02	No known flanking GlyGly site, ratio may be meaningful	0.77817			0.77817
290	46	271	YCR005C	CIT2	>YCR005C CIT2 SGDID:S000000598, Chr III from 122326-120944, reverse complement, Verified ORF, Citrate synthase, catalyzes the condensation of acetyl coenzyme A and oxaloacetate to form citrate, peroxisomal isozyme involved in glyoxylate cycle; expression	1	143.107	0.000182337	181.49	Known Flanking GlyGly site, ratio meaningless
291	50	271	YCR005C	CIT2	>YCR005C CIT2 SGDID:S000000598, Chr III from 122326-120944, reverse complement, Verified ORF, Citrate synthase, catalyzes the condensation of acetyl coenzyme A and oxaloacetate to form citrate, peroxisomal isozyme involved in glyoxylate cycle; expression	1	90.8158	8.0173e-41	146.11	Known Flanking GlyGly site, ratio meaningless
292	52	271	YCR005C	CIT2	>YCR005C CIT2 SGDID:S000000598, Chr III from 122326-120944, reverse complement, Verified ORF, Citrate synthase, catalyzes the condensation of acetyl coenzyme A and oxaloacetate to form citrate, peroxisomal isozyme involved in glyoxylate cycle; expression	1	189.516	0.000411071	189.52	Known Flanking GlyGly site, ratio meaningless
293	96	271	YCR005C	CIT2	>YCR005C CIT2 SGDID:S000000598, Chr III from 122326-120944, reverse complement, Verified ORF, Citrate synthase, catalyzes the condensation of acetyl coenzyme A and oxaloacetate to form citrate, peroxisomal isozyme involved in glyoxylate cycle; expression	1	144.172	2.08247e-09	202	No known flanking GlyGly site, ratio may be meaningful	0.831549	0.560699	0.681794	0.682481
726	406	720	YFR014C	CMK1	>YFR014C CMK1 SGDID:S000001910, Chr VI from 173869-172529, reverse complement, Verified ORF, Calmodulin-dependent protein kinase; may play a role in stress response, many CA++/calmodulan dependent phosphorylation substrates demonstrated in vitro, amino ac	1	70.8081	0.0111749	70.808	No known flanking GlyGly site, ratio may be meaningful
727	8	720	YFR014C	CMK1	>YFR014C CMK1 SGDID:S000001910, Chr VI from 173869-172529, reverse complement, Verified ORF, Calmodulin-dependent protein kinase; may play a role in stress response, many CA++/calmodulan dependent phosphorylation substrates demonstrated in vitro, amino ac	0.999905	40.2182	0.00396359	87.647	No known flanking GlyGly site, ratio may be meaningful
1673	400	1809	YOL016C	CMK2	>YOL016C CMK2 SGDID:S000005376, Chr XV from 296121-294778, reverse complement, Verified ORF, Calmodulin-dependent protein kinase; may play a role in stress response, many CA++/calmodulan dependent phosphorylation substrates demonstrated in vitro, amino ac	1	59.8396	0.0814156	59.84	No known flanking GlyGly site, ratio may be meaningful	0.928664	1.17767	0.954146	1.0143
1422	22	1510	YML057W	CMP2	>YML057W CMP2 SGDID:S000004521, Chr XIII from 160180-161994, Verified ORF, Calcineurin A; one isoform (the other is CNA1) of the catalytic subunit of calcineurin, a Ca++/calmodulin-regulated protein phosphatase which regulates Crz1p (a stress-response tra	1	60.8261	0.0188425	60.826	No known flanking GlyGly site, ratio may be meaningful
1400	443	1481	YLR433C	CNA1	>YLR433C CNA1 SGDID:S000004425, Chr XII from 1006005-1004344, reverse complement, Verified ORF, Calcineurin A; one isoform (the other is CMP2) of the catalytic subunit of calcineurin, a Ca++/calmodulin-regulated protein phosphatase which regulates Crz1p (	1	77.3565	0.00156145	77.357	No known flanking GlyGly site, ratio may be meaningful
1401	3	1481	YLR433C	CNA1	>YLR433C CNA1 SGDID:S000004425, Chr XII from 1006005-1004344, reverse complement, Verified ORF, Calcineurin A; one isoform (the other is CMP2) of the catalytic subunit of calcineurin, a Ca++/calmodulin-regulated protein phosphatase which regulates Crz1p (	1	64.8033	0.00385173	78.939	No flanking Lys, ratio valid
215	53	199	YBR155W	CNS1	>YBR155W CNS1 SGDID:S000000359, Chr II from 549765-550922, Verified ORF, TPR-containing co-chaperone; binds both Hsp82p (Hsp90) and Ssa1p (Hsp70) and stimulates the ATPase activity of SSA1, ts mutants reduce Hsp82p function while over expression suppresse	1	134.397	0.000155868	134.4	No known flanking GlyGly site, ratio may be meaningful	0.652995			0.652995
385	1189	363	YDL145C	COP1	>YDL145C COP1 SGDID:S000002304, Chr IV from 198177-194572, reverse complement, Verified ORF, Alpha subunit of COPI vesicle coatomer complex, which surrounds transport vesicles in the early secretory pathway	1	166.071	0.000232944	174.94	No flanking Lys, ratio valid	0.467314			0.467314
237	721	217	YBR203W	COS111	>YBR203W COS111 SGDID:S000000407, Chr II from 629163-631937, Verified ORF, Protein required for resistance to the antifungal drug ciclopirox olamine; not related to the subtelomerically-encoded COS family; the authentic, non-tagged protein is detected in	1	42.629	1.20445e-15	59.265	No flanking Lys, ratio valid
251	205	243	YML132W	COS3	>YML132W COS3 SGDID:S000004601, Chr XIII from 7244-8383, Verified ORF, Protein involved in salt resistance; interacts with sodium:hydrogen antiporter Nha1p; member of the DUP380 subfamily of conserved, often subtelomerically-encoded proteins;>YBR302C COS	1	96.5608	0.00133075	96.561	No known flanking GlyGly site, ratio may be meaningful
252	7;7;7;7	243;712;924;1217	YML132W;YFL062W;YGR295C;YJR161C	COS3	>YML132W COS3 SGDID:S000004601, Chr XIII from 7244-8383, Verified ORF, Protein involved in salt resistance; interacts with sodium:hydrogen antiporter Nha1p; member of the DUP380 subfamily of conserved, often subtelomerically-encoded proteins;>YBR302C COS	0.999999	59.0532	0.000389472	156.16	No known flanking GlyGly site, ratio may be meaningful
253	18;18;18	243;712;1217	YML132W;YFL062W;YJR161C	COS3	>YML132W COS3 SGDID:S000004601, Chr XIII from 7244-8383, Verified ORF, Protein involved in salt resistance; interacts with sodium:hydrogen antiporter Nha1p; member of the DUP380 subfamily of conserved, often subtelomerically-encoded proteins;>YBR302C COS	1	166.624	0.000223568	190.1	No known flanking GlyGly site, ratio may be meaningful
720	205;205	712;924	YFL062W;YGR295C	COS4	>YFL062W COS4 SGDID:S000001832, Chr VI from 6426-7565, Verified ORF, Protein of unknown function, member of the DUP380 subfamily of conserved, often subtelomerically-encoded proteins;>YNL336W COS1 SGDID:S000005280, Chr XIV from 8330-9475, Verified ORF,	1	171.288	0.000114702	309.35	No known flanking GlyGly site, ratio may be meaningful
1161	382	1217	YJR161C	COS5	>YJR161C COS5 SGDID:S000003922, Chr X from 743990-742839, reverse complement, Verified ORF, Protein of unknown function, member the DUP380 subfamily of conserved, often subtelomerically-encoded proteins;>YDL248W COS7 SGDID:S000002407, Chr IV from 1802-29	1	63.4188	0.0484935	63.419	No known flanking GlyGly site, ratio may be meaningful
940	18	924	YGR295C	COS6	>YGR295C COS6 SGDID:S000003527, Chr VII from 1082736-1081591, reverse complement, Verified ORF, Protein of unknown function, member of the DUP380 subfamily of conserved, often subtelomerically-encoded proteins	1	65.7195	0.0329049	65.719	No known flanking GlyGly site, ratio may be meaningful
981	31	965	YHR051W	COX6	>YHR051W COX6 SGDID:S000001093, Chr VIII from 209699-210145, Verified ORF, Subunit VI of cytochrome c oxidase, which is the terminal member of the mitochondrial inner membrane electron transport chain; expression is regulated by oxygen levels	1	70.5248	0.0350241	70.525	No flanking Lys, ratio valid					0.987078		0.987078
1147	414	1199	YJR109C	CPA2	>YJR109C CPA2 SGDID:S000003870, Chr X from 632932-629576, reverse complement, Verified ORF, Large subunit of carbamoyl phosphate synthetase, which catalyzes a step in the synthesis of citrulline, an arginine precursor	1	107.529	0.00184643	107.53	No flanking Lys, ratio valid	0.956154			0.956154
482	42	452	YDR155C	CPR1	>YDR155C CPR1 SGDID:S000002562, Chr IV from 768998-768510, reverse complement, Verified ORF, Cytoplasmic peptidyl-prolyl cis-trans isomerase (cyclophilin), catalyzes the cis-trans isomerization of peptide bonds N-terminal to proline residues; binds the dr	1	96.4552	0.000615034	96.455	No flanking Lys, ratio valid	0.684209	0.651197	0.502407	0.607182
483	87	452	YDR155C	CPR1	>YDR155C CPR1 SGDID:S000002562, Chr IV from 768998-768510, reverse complement, Verified ORF, Cytoplasmic peptidyl-prolyl cis-trans isomerase (cyclophilin), catalyzes the cis-trans isomerization of peptide bonds N-terminal to proline residues; binds the dr	1	134.66	5.50267e-10	244.73	Known Flanking GlyGly site, ratio meaningless
484	139	452	YDR155C	CPR1	>YDR155C CPR1 SGDID:S000002562, Chr IV from 768998-768510, reverse complement, Verified ORF, Cytoplasmic peptidyl-prolyl cis-trans isomerase (cyclophilin), catalyzes the cis-trans isomerization of peptide bonds N-terminal to proline residues; binds the dr	1	104.014	6.49802e-14	210.08	Known Flanking GlyGly site, ratio meaningless
485	151	452	YDR155C	CPR1	>YDR155C CPR1 SGDID:S000002562, Chr IV from 768998-768510, reverse complement, Verified ORF, Cytoplasmic peptidyl-prolyl cis-trans isomerase (cyclophilin), catalyzes the cis-trans isomerization of peptide bonds N-terminal to proline residues; binds the dr	1	127.793	4.92836e-19	294	Known Flanking GlyGly site, ratio meaningless
486	158	452	YDR155C	CPR1	>YDR155C CPR1 SGDID:S000002562, Chr IV from 768998-768510, reverse complement, Verified ORF, Cytoplasmic peptidyl-prolyl cis-trans isomerase (cyclophilin), catalyzes the cis-trans isomerization of peptide bonds N-terminal to proline residues; binds the dr	1	111.607	0.000386317	120.99	No flanking Lys, ratio valid	0.886891	1.10339	0.636911	0.8542	0.536405		0.536405
487	29	452	YDR155C	CPR1	>YDR155C CPR1 SGDID:S000002562, Chr IV from 768998-768510, reverse complement, Verified ORF, Cytoplasmic peptidyl-prolyl cis-trans isomerase (cyclophilin), catalyzes the cis-trans isomerization of peptide bonds N-terminal to proline residues; binds the dr	1	108.725	2.56324e-14	286.74	No known flanking GlyGly site, ratio may be meaningful	0.727898	0.646239	0.793259	0.719934		0.482432	0.482432
488	80	452	YDR155C	CPR1	>YDR155C CPR1 SGDID:S000002562, Chr IV from 768998-768510, reverse complement, Verified ORF, Cytoplasmic peptidyl-prolyl cis-trans isomerase (cyclophilin), catalyzes the cis-trans isomerization of peptide bonds N-terminal to proline residues; binds the dr	1	76.4001	1.78699e-06	309.49	Known Flanking GlyGly site, ratio meaningless
1330	223	1408	YLR216C	CPR6	>YLR216C CPR6 SGDID:S000004206, Chr XII from 573213-572098, reverse complement, Verified ORF, Peptidyl-prolyl cis-trans isomerase (cyclophilin), catalyzes the cis-trans isomerization of peptide bonds N-terminal to proline residues; binds to Hsp82p and con	1	74.8534	0.0814156	74.853	No known flanking GlyGly site, ratio may be meaningful	0.633285	0.732126		0.680915
1101	8	1150	YJL172W	CPS1	>YJL172W CPS1 SGDID:S000003708, Chr X from 97731-99461, Verified ORF, Vacuolar carboxypeptidase yscS; expression is induced under low-nitrogen conditions	1	88.3697	0.000706747	134.75	No flanking Lys, ratio valid	1.36721	0.787246	0.730232	0.922858
1612	250	1722	YNL130C	CPT1	>YNL130C CPT1 SGDID:S000005074, Chr XIV from 380833-380784,380691-379560, reverse complement, Verified ORF, Cholinephosphotransferase, required for phosphatidylcholine biosynthesis and for inositol-dependent regulation of EPT1 transcription	1	218.73	1.21856e-05	218.73	No known flanking GlyGly site, ratio may be meaningful	0.472614			0.472614
1002	352	1001	YHR146W	CRP1	>YHR146W CRP1 SGDID:S000001189, Chr VIII from 390303-391700, Verified ORF, Protein that binds to cruciform DNA structures	0.888661	9.02089	0.000157999	144.88	No known flanking GlyGly site, ratio may be meaningful
1384	96	1462	YLR380W	CSR1	>YLR380W CSR1 SGDID:S000004372, Chr XII from 878282-879508, Verified ORF, Phosphatidylinositol transfer protein with a potential role in regulating lipid and fatty acid metabolism under heme-depleted conditions; interacts specifically with thioredoxin per	1	112.411	0.000476634	184.96	No known flanking GlyGly site, ratio may be meaningful	0.849705	0.861939		0.8558
1959	670	2085	YPR030W	CSR2	>YPR030W CSR2 SGDID:S000006234, Chr XVI from 627877-631242, Verified ORF, Nuclear protein with a potential regulatory role in utilization of galactose and nonfermentable carbon sources; overproduction suppresses the lethality at high temperature of a chs5	1	112.938	0.00427121	122.55	No known flanking GlyGly site, ratio may be meaningful
1984	912	2119	YPR135W	CTF4	>YPR135W CTF4 SGDID:S000006339, Chr XVI from 799230-802013, Verified ORF, Chromatin-associated protein, required for sister chromatid cohesion; interacts with DNA polymerase alpha (Pol1p) and may link DNA synthesis to sister chromatid cohesion	1	153.036	0.00115726	153.04	No known flanking GlyGly site, ratio may be meaningful
1982	345	2114	YPR124W	CTR1	>YPR124W CTR1 SGDID:S000006328, Chr XVI from 786204-787424, Verified ORF, High-affinity copper transporter of the plasma membrane, mediates nearly all copper uptake under low copper conditions; transcriptionally induced at low copper levels and degraded a	1	261.449	3.04544e-05	261.45	No known flanking GlyGly site, ratio may be meaningful
1983	402	2114	YPR124W	CTR1	>YPR124W CTR1 SGDID:S000006328, Chr XVI from 786204-787424, Verified ORF, High-affinity copper transporter of the plasma membrane, mediates nearly all copper uptake under low copper conditions; transcriptionally induced at low copper levels and degraded a	1	170.019	0.000252723	170.02	No known flanking GlyGly site, ratio may be meaningful
841	6	850	YGR088W	CTT1	>YGR088W CTT1 SGDID:S000003320, Chr VII from 654638-656326, Verified ORF, Cytosolic catalase T, has a role in protection from oxidative damage by hydrogen peroxide	0.920161	10.6165	0.00843989	61.962	No known flanking GlyGly site, ratio may be meaningful	1.50908			1.50908
1543	196	1647	YMR264W	CUE1	>YMR264W CUE1 SGDID:S000004877, Chr XIII from 795804-796415, Verified ORF, Endoplasmic reticulum membrane protein that recruits the ubiquitin-conjugating enzyme Ubc7p to the ER where it functions in protein degradation; contains a CUE domain that binds ub	1	68.6757	0.0172168	68.676	No known flanking GlyGly site, ratio may be meaningful
1755	56	1875	YOR042W	CUE5	>YOR042W CUE5 SGDID:S000005568, Chr XV from 408425-409660, Verified ORF, Protein containing a CUE domain that binds ubiquitin, which may facilitate intramolecular monoubiquitination; green fluorescent protein (GFP)-fusion protein localizes to the cytoplas	0.999997	55.0445	0.000719037	151.22	No known flanking GlyGly site, ratio may be meaningful	0.832134			0.832134
1756	8	1875	YOR042W	CUE5	>YOR042W CUE5 SGDID:S000005568, Chr XV from 408425-409660, Verified ORF, Protein containing a CUE domain that binds ubiquitin, which may facilitate intramolecular monoubiquitination; green fluorescent protein (GFP)-fusion protein localizes to the cytoplas	1	114.79	1.21063e-05	327.62	Known Flanking GlyGly site, ratio meaningless
1757	15	1875	YOR042W	CUE5	>YOR042W CUE5 SGDID:S000005568, Chr XV from 408425-409660, Verified ORF, Protein containing a CUE domain that binds ubiquitin, which may facilitate intramolecular monoubiquitination; green fluorescent protein (GFP)-fusion protein localizes to the cytoplas	0.999375	32.0391	0.000814261	55.011	Known Flanking GlyGly site, ratio meaningless
1758	4	1875	YOR042W	CUE5	>YOR042W CUE5 SGDID:S000005568, Chr XV from 408425-409660, Verified ORF, Protein containing a CUE domain that binds ubiquitin, which may facilitate intramolecular monoubiquitination; green fluorescent protein (GFP)-fusion protein localizes to the cytoplas	1	96.1761	8.64242e-19	353.96	Known Flanking GlyGly site, ratio meaningless
1759	395	1875	YOR042W	CUE5	>YOR042W CUE5 SGDID:S000005568, Chr XV from 408425-409660, Verified ORF, Protein containing a CUE domain that binds ubiquitin, which may facilitate intramolecular monoubiquitination; green fluorescent protein (GFP)-fusion protein localizes to the cytoplas	0.5	0	0.00810836	91.518	Known Flanking GlyGly site, ratio meaningless
1760	396	1875	YOR042W	CUE5	>YOR042W CUE5 SGDID:S000005568, Chr XV from 408425-409660, Verified ORF, Protein containing a CUE domain that binds ubiquitin, which may facilitate intramolecular monoubiquitination; green fluorescent protein (GFP)-fusion protein localizes to the cytoplas	0.5	0	0.00810836	91.518	Known Flanking GlyGly site, ratio meaningless
1761	354	1875	YOR042W	CUE5	>YOR042W CUE5 SGDID:S000005568, Chr XV from 408425-409660, Verified ORF, Protein containing a CUE domain that binds ubiquitin, which may facilitate intramolecular monoubiquitination; green fluorescent protein (GFP)-fusion protein localizes to the cytoplas	1	225.387	1.28417e-06	225.39	Known Flanking GlyGly site, ratio meaningless
1762	370	1875	YOR042W	CUE5	>YOR042W CUE5 SGDID:S000005568, Chr XV from 408425-409660, Verified ORF, Protein containing a CUE domain that binds ubiquitin, which may facilitate intramolecular monoubiquitination; green fluorescent protein (GFP)-fusion protein localizes to the cytoplas	1	302.197	5.547e-28	311.33	Known Flanking GlyGly site, ratio meaningless
1763	76	1875	YOR042W	CUE5	>YOR042W CUE5 SGDID:S000005568, Chr XV from 408425-409660, Verified ORF, Protein containing a CUE domain that binds ubiquitin, which may facilitate intramolecular monoubiquitination; green fluorescent protein (GFP)-fusion protein localizes to the cytoplas	1	45.072	0.00723071	45.072	No known flanking GlyGly site, ratio may be meaningful		0.901399		0.901399
1764	347	1875	YOR042W	CUE5	>YOR042W CUE5 SGDID:S000005568, Chr XV from 408425-409660, Verified ORF, Protein containing a CUE domain that binds ubiquitin, which may facilitate intramolecular monoubiquitination; green fluorescent protein (GFP)-fusion protein localizes to the cytoplas	0.998462	28.1232	0.000455426	60.489	Known Flanking GlyGly site, ratio meaningless
1765	371	1875	YOR042W	CUE5	>YOR042W CUE5 SGDID:S000005568, Chr XV from 408425-409660, Verified ORF, Protein containing a CUE domain that binds ubiquitin, which may facilitate intramolecular monoubiquitination; green fluorescent protein (GFP)-fusion protein localizes to the cytoplas	0.982846	17.5811	0.000914028	100.09	Known Flanking GlyGly site, ratio meaningless
1766	387	1875	YOR042W	CUE5	>YOR042W CUE5 SGDID:S000005568, Chr XV from 408425-409660, Verified ORF, Protein containing a CUE domain that binds ubiquitin, which may facilitate intramolecular monoubiquitination; green fluorescent protein (GFP)-fusion protein localizes to the cytoplas	1	128.439	0.000119583	128.44	No known flanking GlyGly site, ratio may be meaningful	0.83999	0.658736	1.04083	0.831998
806	688	824	YGR003W	CUL3	>YGR003W CUL3 SGDID:S000003235, Chr VII from 500136-502370, Verified ORF, Ubiquitin-protein ligase, member of the cullin family with similarity to Cdc53p and human CUL3; required for ubiquitin-dependent degredation of the RNA Polymerase II subunit RPO21	1	97.0131	0.000145127	259.27	Known Flanking GlyGly site, ratio meaningless
807	692	824	YGR003W	CUL3	>YGR003W CUL3 SGDID:S000003235, Chr VII from 500136-502370, Verified ORF, Ubiquitin-protein ligase, member of the cullin family with similarity to Cdc53p and human CUL3; required for ubiquitin-dependent degredation of the RNA Polymerase II subunit RPO21	0.837955	7.13585	0.00443889	96.805	Known Flanking GlyGly site, ratio meaningless
808	718	824	YGR003W	CUL3	>YGR003W CUL3 SGDID:S000003235, Chr VII from 500136-502370, Verified ORF, Ubiquitin-protein ligase, member of the cullin family with similarity to Cdc53p and human CUL3; required for ubiquitin-dependent degredation of the RNA Polymerase II subunit RPO21	1	127.118	0.00061509	169.37	No flanking Lys, ratio valid
1642	42	1764	YNL245C	CWC25	>YNL245C CWC25 SGDID:S000005189, Chr XIV from 186886-186347, reverse complement, Verified ORF, Component of a complex containing Cef1p, involved in pre-mRNA splicing; has similarity to S. pombe Cwf25p	0.999226	31.1116	0.00716114	113.08	No known flanking GlyGly site, ratio may be meaningful
1063	616	1090	YJL005W	CYR1	>YJL005W CYR1 SGDID:S000003542, Chr X from 425151-431231, Verified ORF, Adenylate cyclase, required for cAMP production and cAMP-dependent protein kinase signaling; the cAMP pathway controls a variety of cellular processes, including metabolism, cell cycl	1	84.8173	0.0378541	84.817	No known flanking GlyGly site, ratio may be meaningful	0.518395			0.518395
1064	366	1090	YJL005W	CYR1	>YJL005W CYR1 SGDID:S000003542, Chr X from 425151-431231, Verified ORF, Adenylate cyclase, required for cAMP production and cAMP-dependent protein kinase signaling; the cAMP pathway controls a variety of cellular processes, including metabolism, cell cycl	1	122.178	0.00279198	238.83	No known flanking GlyGly site, ratio may be meaningful	0.540466			0.540466
47	154	70	YAL012W	CYS3	>YAL012W CYS3 SGDID:S000000010, Chr I from 130802-131986, Verified ORF, Cystathionine gamma-lyase, catalyzes one of the two reactions involved in the transsulfuration pathway that yields cysteine from homocysteine with the intermediary formation of cystat	1	161.476	0.00131439	161.48	No known flanking GlyGly site, ratio may be meaningful	1.09602	0.72452		0.891116
48	8	70	YAL012W	CYS3	>YAL012W CYS3 SGDID:S000000010, Chr I from 130802-131986, Verified ORF, Cystathionine gamma-lyase, catalyzes one of the two reactions involved in the transsulfuration pathway that yields cysteine from homocysteine with the intermediary formation of cystat	1	72.2905	0.000573801	141.13	No known flanking GlyGly site, ratio may be meaningful	0.549376		0.910134	0.707111
871	352	868	YGR155W	CYS4	>YGR155W CYS4 SGDID:S000003387, Chr VII from 798548-800071, Verified ORF, Cystathionine beta-synthase, catalyzes the synthesis of cystathionine from serine and homocysteine, the first committed step in cysteine biosynthesis	1	116.902	9.11496e-05	116.9	Known Flanking GlyGly site, ratio meaningless
872	359	868	YGR155W	CYS4	>YGR155W CYS4 SGDID:S000003387, Chr VII from 798548-800071, Verified ORF, Cystathionine beta-synthase, catalyzes the synthesis of cystathionine from serine and homocysteine, the first committed step in cysteine biosynthesis	0.997949	26.8716	0.00178969	57.046	Known Flanking GlyGly site, ratio meaningless
873	457	868	YGR155W	CYS4	>YGR155W CYS4 SGDID:S000003387, Chr VII from 798548-800071, Verified ORF, Cystathionine beta-synthase, catalyzes the synthesis of cystathionine from serine and homocysteine, the first committed step in cysteine biosynthesis	1	187.563	1.01215e-05	187.56	No known flanking GlyGly site, ratio may be meaningful
874	273	868	YGR155W	CYS4	>YGR155W CYS4 SGDID:S000003387, Chr VII from 798548-800071, Verified ORF, Cystathionine beta-synthase, catalyzes the synthesis of cystathionine from serine and homocysteine, the first committed step in cysteine biosynthesis	0.999999	62.3991	0.00133761	136.93	No known flanking GlyGly site, ratio may be meaningful	0.791321	0.597085	1.2172	0.831604
875	117	868	YGR155W	CYS4	>YGR155W CYS4 SGDID:S000003387, Chr VII from 798548-800071, Verified ORF, Cystathionine beta-synthase, catalyzes the synthesis of cystathionine from serine and homocysteine, the first committed step in cysteine biosynthesis	1	89.2306	0.0127002	103.97	No known flanking GlyGly site, ratio may be meaningful	0.890518			0.890518
1767	49	1877	YOR046C	DBP5	>YOR046C DBP5 SGDID:S000005572, Chr XV from 415908-414460, reverse complement, Verified ORF, Cytoplasmic ATP-dependent RNA helicase of the DEAD-box family involved in mRNA export from the nucleus; involved in translation termination	1	80.9162	0.020899	121.5	No known flanking GlyGly site, ratio may be meaningful	0.85267	0.650779	0.784705	0.757949	0.839979	0.214603	0.424573
1768	5	1877	YOR046C	DBP5	>YOR046C DBP5 SGDID:S000005572, Chr XV from 415908-414460, reverse complement, Verified ORF, Cytoplasmic ATP-dependent RNA helicase of the DEAD-box family involved in mRNA export from the nucleus; involved in translation termination	1	80.9162	0.000151165	99.788	No flanking Lys, ratio valid	0.722129			0.722129
1606	614	1718	YNL118C	DCP2	>YNL118C DCP2 SGDID:S000005062, Chr XIV from 405566-402654, reverse complement, Verified ORF, Catalytic subunit of the Dcp1p-Dcp2p decapping enzyme complex, which removes the 5' cap structure from mRNAs prior to their degradation; member of the Nudix hydr	1	170.005	0.000110353	170	Known Flanking GlyGly site, ratio meaningless
1607	604	1718	YNL118C	DCP2	>YNL118C DCP2 SGDID:S000005062, Chr XIV from 405566-402654, reverse complement, Verified ORF, Catalytic subunit of the Dcp1p-Dcp2p decapping enzyme complex, which removes the 5' cap structure from mRNAs prior to their degradation; member of the Nudix hydr	1	161.944	0.000620002	161.94	Known Flanking GlyGly site, ratio meaningless
1357	13	1425	YLR270W	DCS1	>YLR270W DCS1 SGDID:S000004260, Chr XII from 681188-682240, Verified ORF, Non-essential hydrolase involved in mRNA decapping, may function in a feedback mechanism to regulate deadenylation, contains pyrophosphatase activity and a HIT (histidine triad) mot	1	79.6386	0.000871906	82.069	No flanking Lys, ratio valid	0.99171			0.99171
679	257	674	YER143W	DDI1	>YER143W DDI1 SGDID:S000000945, Chr V from 456314-457600, Verified ORF, DNA damage-inducible v-SNARE binding protein, contains a ubiquitin-associated (UBA) domain, may act as a negative regulator of constitutive exocytosis, may play a role in S-phase chec	1	77.9225	0.00228918	204.62	No flanking Lys, ratio valid	1.69294	1.02334	0.958851	1.18432	0.894066	0.537004	0.692905
680	234	674	YER143W	DDI1	>YER143W DDI1 SGDID:S000000945, Chr V from 456314-457600, Verified ORF, DNA damage-inducible v-SNARE binding protein, contains a ubiquitin-associated (UBA) domain, may act as a negative regulator of constitutive exocytosis, may play a role in S-phase chec	0.982469	17.485	0.0241497	82.305	No known flanking GlyGly site, ratio may be meaningful					0.397198	0.540955	0.463537
681	171	674	YER143W	DDI1	>YER143W DDI1 SGDID:S000000945, Chr V from 456314-457600, Verified ORF, DNA damage-inducible v-SNARE binding protein, contains a ubiquitin-associated (UBA) domain, may act as a negative regulator of constitutive exocytosis, may play a role in S-phase chec	0.752206	4.82245	0.0559131	55.176	Known Flanking GlyGly site, ratio meaningless
682	172	674	YER143W	DDI1	>YER143W DDI1 SGDID:S000000945, Chr V from 456314-457600, Verified ORF, DNA damage-inducible v-SNARE binding protein, contains a ubiquitin-associated (UBA) domain, may act as a negative regulator of constitutive exocytosis, may play a role in S-phase chec	0.999997	55.5065	3.66676e-08	269.14	Known Flanking GlyGly site, ratio meaningless
1490	45	1606	YMR173W	DDR48	>YMR173W DDR48 SGDID:S000004784, Chr XIII from 608688-609980, Verified ORF, DNA damage-responsive protein, expression is increased in response to heat-shock stress or treatments that produce DNA lesions; contains multiple repeats of the amino acid sequenc	1	127.07	0.000592712	127.07	No known flanking GlyGly site, ratio may be meaningful	0.967739			0.967739
1491	6	1606	YMR173W	DDR48	>YMR173W DDR48 SGDID:S000004784, Chr XIII from 608688-609980, Verified ORF, DNA damage-responsive protein, expression is increased in response to heat-shock stress or treatments that produce DNA lesions; contains multiple repeats of the amino acid sequenc	1	124.374	0.00277138	163.84	Known Flanking GlyGly site, ratio meaningless
1492	8	1606	YMR173W	DDR48	>YMR173W DDR48 SGDID:S000004784, Chr XIII from 608688-609980, Verified ORF, DNA damage-responsive protein, expression is increased in response to heat-shock stress or treatments that produce DNA lesions; contains multiple repeats of the amino acid sequenc	1	91.4808	2.00122e-07	265.96	Known Flanking GlyGly site, ratio meaningless
1493	55	1606	YMR173W	DDR48	>YMR173W DDR48 SGDID:S000004784, Chr XIII from 608688-609980, Verified ORF, DNA damage-responsive protein, expression is increased in response to heat-shock stress or treatments that produce DNA lesions; contains multiple repeats of the amino acid sequenc	1	120.033	0.000124901	240.8	No known flanking GlyGly site, ratio may be meaningful	1.35919	0.957738	0.759059	0.99602
1494	396	1606	YMR173W	DDR48	>YMR173W DDR48 SGDID:S000004784, Chr XIII from 608688-609980, Verified ORF, DNA damage-responsive protein, expression is increased in response to heat-shock stress or treatments that produce DNA lesions; contains multiple repeats of the amino acid sequenc	1	326.198	5.2707e-16	326.2	No flanking Lys, ratio valid	1.3175		1.06081	1.18221
1495	202	1606	YMR173W	DDR48	>YMR173W DDR48 SGDID:S000004784, Chr XIII from 608688-609980, Verified ORF, DNA damage-responsive protein, expression is increased in response to heat-shock stress or treatments that produce DNA lesions; contains multiple repeats of the amino acid sequenc	0.913712	10.2486	0.000139714	125.08	Known Flanking GlyGly site, ratio meaningless
1496	203	1606	YMR173W	DDR48	>YMR173W DDR48 SGDID:S000004784, Chr XIII from 608688-609980, Verified ORF, DNA damage-responsive protein, expression is increased in response to heat-shock stress or treatments that produce DNA lesions; contains multiple repeats of the amino acid sequenc	0.837571	7.12357	7.88667e-05	120.8	Known Flanking GlyGly site, ratio meaningless
1497	359	1606	YMR173W	DDR48	>YMR173W DDR48 SGDID:S000004784, Chr XIII from 608688-609980, Verified ORF, DNA damage-responsive protein, expression is increased in response to heat-shock stress or treatments that produce DNA lesions; contains multiple repeats of the amino acid sequenc	1	71.3538	2.44783e-05	125.08	Known Flanking GlyGly site, ratio meaningless
1498	360	1606	YMR173W	DDR48	>YMR173W DDR48 SGDID:S000004784, Chr XIII from 608688-609980, Verified ORF, DNA damage-responsive protein, expression is increased in response to heat-shock stress or treatments that produce DNA lesions; contains multiple repeats of the amino acid sequenc	0.874575	8.43413	2.44783e-05	125.08	Known Flanking GlyGly site, ratio meaningless
1499	307	1606	YMR173W	DDR48	>YMR173W DDR48 SGDID:S000004784, Chr XIII from 608688-609980, Verified ORF, DNA damage-responsive protein, expression is increased in response to heat-shock stress or treatments that produce DNA lesions; contains multiple repeats of the amino acid sequenc	0.924746	10.8949	4.35327e-05	107.09	Known Flanking GlyGly site, ratio meaningless
1500	308	1606	YMR173W	DDR48	>YMR173W DDR48 SGDID:S000004784, Chr XIII from 608688-609980, Verified ORF, DNA damage-responsive protein, expression is increased in response to heat-shock stress or treatments that produce DNA lesions; contains multiple repeats of the amino acid sequenc	0.5	0	4.35327e-05	107.09	Known Flanking GlyGly site, ratio meaningless
1169	269	1237	YKL054C	DEF1	>YKL054C DEF1 SGDID:S000001537, Chr XI from 338397-336181, reverse complement, Verified ORF, RNAPII degradation factor, forms a complex with Rad26p in chromatin, enables ubiquitination and proteolysis of RNAPII present in an elongation complex; mutant is	1	144.106	0.00221058	185.27	No known flanking GlyGly site, ratio may be meaningful	0.854626			0.854626
1170	115	1237	YKL054C	DEF1	>YKL054C DEF1 SGDID:S000001537, Chr XI from 338397-336181, reverse complement, Verified ORF, RNAPII degradation factor, forms a complex with Rad26p in chromatin, enables ubiquitination and proteolysis of RNAPII present in an elongation complex; mutant is	1	125.839	0.000260963	125.84	No known flanking GlyGly site, ratio may be meaningful	1.07044			1.07044
1564	30	1672	YMR316W	DIA1	>YMR316W DIA1 SGDID:S000004935, Chr XIII from 904823-905833, Verified ORF, Protein of unknown function, involved in invasive and pseudohyphal growth; green fluorescent protein (GFP)-fusion protein localizes to the cytoplasm in a punctate pattern	1	48.1146	0.011888	66.977	No known flanking GlyGly site, ratio may be meaningful
1234	169	1306	YKR035W-A	DID2	>YKR035W-A DID2 SGDID:S000006435, Chr XI from 507581-508195, Verified ORF, Class E protein of the vacuolar protein-sorting (Vps) pathway; binds Vps4p and directs it to dissociate ESCRT-III complexes; forms a functional and physical complex with Ist1p; hum	1	132.323	0.000142361	196.44	No known flanking GlyGly site, ratio may be meaningful	1.06644			1.06644
1945	76	2073	YPL265W	DIP5	>YPL265W DIP5 SGDID:S000006186, Chr XVI from 41043-42869, Verified ORF, Dicarboxylic amino acid permease, mediates high-affinity and high-capacity transport of L-glutamate and L-aspartate; also a transporter for Gln, Asn, Ser, Ala, and Gly	1	55.7818	0.000455426	145.09	No flanking Lys, ratio valid
1946	7	2073	YPL265W	DIP5	>YPL265W DIP5 SGDID:S000006186, Chr XVI from 41043-42869, Verified ORF, Dicarboxylic amino acid permease, mediates high-affinity and high-capacity transport of L-glutamate and L-aspartate; also a transporter for Gln, Asn, Ser, Ala, and Gly	1	85.2649	0.00498307	85.265	No known flanking GlyGly site, ratio may be meaningful
1947	2	2073	YPL265W	DIP5	>YPL265W DIP5 SGDID:S000006186, Chr XVI from 41043-42869, Verified ORF, Dicarboxylic amino acid permease, mediates high-affinity and high-capacity transport of L-glutamate and L-aspartate; also a transporter for Gln, Asn, Ser, Ala, and Gly	1	71.7761	0.000884153	113.18	No known flanking GlyGly site, ratio may be meaningful
1948	30	2073	YPL265W	DIP5	>YPL265W DIP5 SGDID:S000006186, Chr XVI from 41043-42869, Verified ORF, Dicarboxylic amino acid permease, mediates high-affinity and high-capacity transport of L-glutamate and L-aspartate; also a transporter for Gln, Asn, Ser, Ala, and Gly	1	74.9664	4.13382e-05	112.64	Known Flanking GlyGly site, ratio meaningless
1949	39	2073	YPL265W	DIP5	>YPL265W DIP5 SGDID:S000006186, Chr XVI from 41043-42869, Verified ORF, Dicarboxylic amino acid permease, mediates high-affinity and high-capacity transport of L-glutamate and L-aspartate; also a transporter for Gln, Asn, Ser, Ala, and Gly	1	111.243	0.000551842	111.24	Known Flanking GlyGly site, ratio meaningless
617	344	602	YEL071W	DLD3	>YEL071W DLD3 SGDID:S000000797, Chr V from 16355-17845, Verified ORF, D-lactate dehydrogenase, part of the retrograde regulon which consists of genes whose expression is stimulated by damage to mitochondria and reduced in cells grown with glutamate as the	1	79.474	0.032525	79.474	No known flanking GlyGly site, ratio may be meaningful
618	17	602	YEL071W	DLD3	>YEL071W DLD3 SGDID:S000000797, Chr V from 16355-17845, Verified ORF, D-lactate dehydrogenase, part of the retrograde regulon which consists of genes whose expression is stimulated by damage to mitochondria and reduced in cells grown with glutamate as the	1	96.4552	0.00105791	96.455	No known flanking GlyGly site, ratio may be meaningful	0.776938	0.667105	1.38394	0.895158
465	801	434	YDR093W	DNF2	>YDR093W DNF2 SGDID:S000002500, Chr IV from 631280-636118, Verified ORF, Aminophospholipid translocase (flippase) that localizes primarily to the plasma membrane; contributes to endocytosis, protein transport and cell polarity; type 4 P-type ATPase	1	86.0142	0.00240523	86.014	No known flanking GlyGly site, ratio may be meaningful	0.918821			0.918821
648	606	649	YER088C	DOT6	>YER088C DOT6 SGDID:S000000890, Chr V from 335184-333172, reverse complement, Verified ORF, Protein of unknown function, involved in telomeric gene silencing and filamentation	1	263.448	0.000460608	263.45	No flanking Lys, ratio valid
250	6	240	YBR278W	DPB3	>YBR278W DPB3 SGDID:S000000482, Chr II from 760290-760895, Verified ORF, Third-largest subunit of DNA polymerase II (DNA polymerase epsilon), required to maintain fidelity of chromosomal replication and also for inheritance of telomeric silencing; mRNA ab	1	73.2482	0.0244279	73.248	No known flanking GlyGly site, ratio may be meaningful
1246	443	1330	YLL008W	DRS1	>YLL008W DRS1 SGDID:S000003931, Chr XII from 131728-133986, Verified ORF, Nucleolar DEAD-box protein required for ribosome assembly and function, including synthesis of 60S ribosomal subunits; constituent of 66S pre-ribosomal particles	1	61.7795	0.0579947	65.246	No known flanking GlyGly site, ratio may be meaningful	0.0884189	0.119054	0.0890655	0.0978738
54	361	76	YAL026C	DRS2	>YAL026C DRS2 SGDID:S000000024, Chr I from 99698-95631, reverse complement, Verified ORF, Aminophospholipid translocase (flippase) that maintains membrane lipid asymmetry in post-Golgi secretory vessicles; contributes to clathrin-coated vesicle formation	1	134.119	0.00181767	172.03	No known flanking GlyGly site, ratio may be meaningful	0.870611			0.870611
1553	33	1652	YMR276W	DSK2	>YMR276W DSK2 SGDID:S000004889, Chr XIII from 818826-819947, Verified ORF, Nuclear-enriched ubiquitin-like polyubiquitin-binding protein, required for spindle pole body (SPB) duplication and for transit through the G2/M phase of the cell cycle, involved i	1	109.041	7.7502e-05	352.27	No known flanking GlyGly site, ratio may be meaningful	1.01528	1.03513	1.10659	1.05161
1554	13	1652	YMR276W	DSK2	>YMR276W DSK2 SGDID:S000004889, Chr XIII from 818826-819947, Verified ORF, Nuclear-enriched ubiquitin-like polyubiquitin-binding protein, required for spindle pole body (SPB) duplication and for transit through the G2/M phase of the cell cycle, involved i	1	76.3572	0.000705635	76.357	No known flanking GlyGly site, ratio may be meaningful	1.08775			1.08775
765	278	755	YGL043W	DST1	>YGL043W DST1 SGDID:S000003011, Chr VII from 417487-418416, Verified ORF, General transcription elongation factor TFIIS, enables RNA polymerase II to read through blocks to elongation by stimulating cleavage of nascent transcripts stalled at transcription	1	96.1904	0.00237935	96.19	No known flanking GlyGly site, ratio may be meaningful	1.19238	0.549054		0.809122
738	16	731	YFR044C	DUG1	>YFR044C DUG1 SGDID:S000001940, Chr VI from 241424-239979, reverse complement, Verified ORF, Probable di- and tri-peptidase; forms a complex with Dug2p and Dug3p to degrade glutathione (GSH) and other peptides containing a gamma-glu-X bond in an alternati	1	115.287	0.000874742	115.29	No known flanking GlyGly site, ratio may be meaningful	3.70605			3.70605
242	74	232	YBR252W	DUT1	>YBR252W DUT1 SGDID:S000000456, Chr II from 722606-723049, Verified ORF, dUTPase, catalyzes hydrolysis of dUTP to dUMP and PPi, thereby preventing incorporation of uracil into DNA during replication; critical for the maintenance of genetic stability	1	90.3783	8.63395e-05	118.66	No flanking Lys, ratio valid	0.708621	0.658495	0.78879	0.716654
558	6	536	YDR424C	DYN2	>YDR424C DYN2 SGDID:S000002832, Chr IV from 1319834-1319810,1319713-1319691,1319610-1319380, reverse complement, Verified ORF, Cytoplasmic light chain dynein, microtubule motor protein; proposed to be involved in the assembly of the nuclear pore complex	1	103.433	6.96076e-05	103.43	No known flanking GlyGly site, ratio may be meaningful
126	807	137	YBL101C	ECM21	>YBL101C ECM21 SGDID:S000000197, Chr II from 28299-24946, reverse complement, Verified ORF, Non-essential protein of unknown function; promoter contains several Gcn4p binding elements	1	168.885	0.000576769	168.89	No known flanking GlyGly site, ratio may be meaningful	1.02893			1.02893
127	787	137	YBL101C	ECM21	>YBL101C ECM21 SGDID:S000000197, Chr II from 28299-24946, reverse complement, Verified ORF, Non-essential protein of unknown function; promoter contains several Gcn4p binding elements	0.999933	41.7534	0.0332468	50.786	Known Flanking GlyGly site, ratio meaningless
128	794	137	YBL101C	ECM21	>YBL101C ECM21 SGDID:S000000197, Chr II from 28299-24946, reverse complement, Verified ORF, Non-essential protein of unknown function; promoter contains several Gcn4p binding elements	1	165.642	5.39722e-08	206.73	Known Flanking GlyGly site, ratio meaningless
129	74	137	YBL101C	ECM21	>YBL101C ECM21 SGDID:S000000197, Chr II from 28299-24946, reverse complement, Verified ORF, Non-essential protein of unknown function; promoter contains several Gcn4p binding elements	1	40.6221	0.000380931	40.622	No flanking Lys, ratio valid	1.5805			1.5805
130	1062	137	YBL101C	ECM21	>YBL101C ECM21 SGDID:S000000197, Chr II from 28299-24946, reverse complement, Verified ORF, Non-essential protein of unknown function; promoter contains several Gcn4p binding elements	0.872757	8.36259	0.000326859	183.85	Known Flanking GlyGly site, ratio meaningless
131	1064	137	YBL101C	ECM21	>YBL101C ECM21 SGDID:S000000197, Chr II from 28299-24946, reverse complement, Verified ORF, Non-essential protein of unknown function; promoter contains several Gcn4p binding elements	0.5	0	0.000326859	100.93	Known Flanking GlyGly site, ratio meaningless
132	617	137	YBL101C	ECM21	>YBL101C ECM21 SGDID:S000000197, Chr II from 28299-24946, reverse complement, Verified ORF, Non-essential protein of unknown function; promoter contains several Gcn4p binding elements	1	63.4236	0.00218527	106.4	No known flanking GlyGly site, ratio may be meaningful	0.995523	0.691917	0.786674	0.815267
168	162	166	YBR078W	ECM33	>YBR078W ECM33 SGDID:S000000282, Chr II from 393118-393175,393506-394854, Verified ORF, GPI-anchored protein of unknown function, has a possible role in apical bud growth; GPI-anchoring on the plasma membrane crucial to function; phosphorylated in mitocho	1	225.549	0.00169648	225.55	No known flanking GlyGly site, ratio may be meaningful	1.10551	0.319299		0.594127
105	1318	119	YBL047C	EDE1	>YBL047C EDE1 SGDID:S000000143, Chr II from 132043-127898, reverse complement, Verified ORF, Key endocytic protein involved in a network of interactions with other endocytic proteins, binds membranes in a ubiquitin-dependent manner, may also bind ubiquiti	1	127.661	0.000441697	127.66	No known flanking GlyGly site, ratio may be meaningful	1.06671			1.06671
106	856	119	YBL047C	EDE1	>YBL047C EDE1 SGDID:S000000143, Chr II from 132043-127898, reverse complement, Verified ORF, Key endocytic protein involved in a network of interactions with other endocytic proteins, binds membranes in a ubiquitin-dependent manner, may also bind ubiquiti	0.999985	48.3421	0.0296281	74.165	No known flanking GlyGly site, ratio may be meaningful	1.7888			1.7888
107	782	119	YBL047C	EDE1	>YBL047C EDE1 SGDID:S000000143, Chr II from 132043-127898, reverse complement, Verified ORF, Key endocytic protein involved in a network of interactions with other endocytic proteins, binds membranes in a ubiquitin-dependent manner, may also bind ubiquiti	1	137.904	0.00071955	137.9	No known flanking GlyGly site, ratio may be meaningful		0.716522		0.716522	0.814028	0.970921	0.88902
108	907	119	YBL047C	EDE1	>YBL047C EDE1 SGDID:S000000143, Chr II from 132043-127898, reverse complement, Verified ORF, Key endocytic protein involved in a network of interactions with other endocytic proteins, binds membranes in a ubiquitin-dependent manner, may also bind ubiquiti	1	206.431	3.78185e-05	279.9	No known flanking GlyGly site, ratio may be meaningful	1.63749	1.0781	1.21956	1.29126
109	1188	119	YBL047C	EDE1	>YBL047C EDE1 SGDID:S000000143, Chr II from 132043-127898, reverse complement, Verified ORF, Key endocytic protein involved in a network of interactions with other endocytic proteins, binds membranes in a ubiquitin-dependent manner, may also bind ubiquiti	1	80.0144	0.0019099	126.43	No known flanking GlyGly site, ratio may be meaningful	1.72488			1.72488
27	166	68	YAL003W	EFB1	>YAL003W EFB1 SGDID:S000000003, Chr I from 142176-142255,142622-143162, Verified ORF, Translation elongation factor 1 beta; stimulates nucleotide exchange to regenerate EF-1 alpha-GTP for the next elongation cycle; part of the EF-1 complex, which facilita	1	68.634	0.00159127	68.634	No known flanking GlyGly site, ratio may be meaningful	0.759592			0.759592
28	8	68	YAL003W	EFB1	>YAL003W EFB1 SGDID:S000000003, Chr I from 142176-142255,142622-143162, Verified ORF, Translation elongation factor 1 beta; stimulates nucleotide exchange to regenerate EF-1 alpha-GTP for the next elongation cycle; part of the EF-1 complex, which facilita	1	88.3697	1.94763e-21	177.16	Known Flanking GlyGly site, ratio meaningless
29	13	68	YAL003W	EFB1	>YAL003W EFB1 SGDID:S000000003, Chr I from 142176-142255,142622-143162, Verified ORF, Translation elongation factor 1 beta; stimulates nucleotide exchange to regenerate EF-1 alpha-GTP for the next elongation cycle; part of the EF-1 complex, which facilita	0.997504	26.0159	0.000481347	73.649	Known Flanking GlyGly site, ratio meaningless
30	109	68	YAL003W	EFB1	>YAL003W EFB1 SGDID:S000000003, Chr I from 142176-142255,142622-143162, Verified ORF, Translation elongation factor 1 beta; stimulates nucleotide exchange to regenerate EF-1 alpha-GTP for the next elongation cycle; part of the EF-1 complex, which facilita	1	120.273	0.00309719	120.27	No known flanking GlyGly site, ratio may be meaningful		1.07832	0.895576	0.982711	0.458798	0.561325	0.507479
1526	593	1623	YMR212C	EFR3	>YMR212C EFR3 SGDID:S000004825, Chr XIII from 693042-690694, reverse complement, Verified ORF, Non-essential protein of unknown function; exhibits synthetic lethal genetic interactions with PHO85; the authentic, non-tagged protein is detected in highly pu	1	135.492	0.000982298	135.49	No known flanking GlyGly site, ratio may be meaningful
1527	664	1623	YMR212C	EFR3	>YMR212C EFR3 SGDID:S000004825, Chr XIII from 693042-690694, reverse complement, Verified ORF, Non-essential protein of unknown function; exhibits synthetic lethal genetic interactions with PHO85; the authentic, non-tagged protein is detected in highly pu	0.997747	26.4635	0.00554577	70.889	No known flanking GlyGly site, ratio may be meaningful
534	50	523	YOR133W	EFT1	>YOR133W EFT1 SGDID:S000005659, Chr XV from 575099-577627, Verified ORF, Elongation factor 2 (EF-2), also encoded by EFT2; catalyzes ribosomal translocation during protein synthesis; contains diphthamide, the unique posttranslationally modified histidine	1	70.9084	7.72268e-05	236.92	No flanking Lys, ratio valid	0.938805	0.784196	0.868189	0.8614		0.731357	0.731357
535	171	523	YOR133W	EFT1	>YOR133W EFT1 SGDID:S000005659, Chr XV from 575099-577627, Verified ORF, Elongation factor 2 (EF-2), also encoded by EFT2; catalyzes ribosomal translocation during protein synthesis; contains diphthamide, the unique posttranslationally modified histidine	1	101.076	0.000968401	101.08	No flanking Lys, ratio valid	0.84142			0.84142
536	61	523	YOR133W	EFT1	>YOR133W EFT1 SGDID:S000005659, Chr XV from 575099-577627, Verified ORF, Elongation factor 2 (EF-2), also encoded by EFT2; catalyzes ribosomal translocation during protein synthesis; contains diphthamide, the unique posttranslationally modified histidine	1	148.69	0.00237155	158.34	No flanking Lys, ratio valid		0.968674	0.922609	0.945361
537	829	523	YOR133W	EFT1	>YOR133W EFT1 SGDID:S000005659, Chr XV from 575099-577627, Verified ORF, Elongation factor 2 (EF-2), also encoded by EFT2; catalyzes ribosomal translocation during protein synthesis; contains diphthamide, the unique posttranslationally modified histidine	1	174.941	0.000813504	212.03	Known Flanking GlyGly site, ratio meaningless
538	841	523	YOR133W	EFT1	>YOR133W EFT1 SGDID:S000005659, Chr XV from 575099-577627, Verified ORF, Elongation factor 2 (EF-2), also encoded by EFT2; catalyzes ribosomal translocation during protein synthesis; contains diphthamide, the unique posttranslationally modified histidine	1	160.233	0.000801256	226.79	Known Flanking GlyGly site, ratio meaningless
539	152	523	YOR133W	EFT1	>YOR133W EFT1 SGDID:S000005659, Chr XV from 575099-577627, Verified ORF, Elongation factor 2 (EF-2), also encoded by EFT2; catalyzes ribosomal translocation during protein synthesis; contains diphthamide, the unique posttranslationally modified histidine	1	78.8221	0.000361821	195.72	No known flanking GlyGly site, ratio may be meaningful	0.894577	0.843955	0.846864	0.86149
540	422	523	YOR133W	EFT1	>YOR133W EFT1 SGDID:S000005659, Chr XV from 575099-577627, Verified ORF, Elongation factor 2 (EF-2), also encoded by EFT2; catalyzes ribosomal translocation during protein synthesis; contains diphthamide, the unique posttranslationally modified histidine	0.5	0	0.000687271	122.75	Known Flanking GlyGly site, ratio meaningless
541	423	523	YOR133W	EFT1	>YOR133W EFT1 SGDID:S000005659, Chr XV from 575099-577627, Verified ORF, Elongation factor 2 (EF-2), also encoded by EFT2; catalyzes ribosomal translocation during protein synthesis; contains diphthamide, the unique posttranslationally modified histidine	0.875569	8.47362	0.000612096	136.49	Known Flanking GlyGly site, ratio meaningless
542	15	523	YOR133W	EFT1	>YOR133W EFT1 SGDID:S000005659, Chr XV from 575099-577627, Verified ORF, Elongation factor 2 (EF-2), also encoded by EFT2; catalyzes ribosomal translocation during protein synthesis; contains diphthamide, the unique posttranslationally modified histidine	1	85.2117	0.00397581	85.212	No flanking Lys, ratio valid
543	479	523	YOR133W	EFT1	>YOR133W EFT1 SGDID:S000005659, Chr XV from 575099-577627, Verified ORF, Elongation factor 2 (EF-2), also encoded by EFT2; catalyzes ribosomal translocation during protein synthesis; contains diphthamide, the unique posttranslationally modified histidine	1	79.0356	1.00099e-05	250.92	No known flanking GlyGly site, ratio may be meaningful	0.798257	0.524019	0.80642	0.696119
544	406	523	YOR133W	EFT1	>YOR133W EFT1 SGDID:S000005659, Chr XV from 575099-577627, Verified ORF, Elongation factor 2 (EF-2), also encoded by EFT2; catalyzes ribosomal translocation during protein synthesis; contains diphthamide, the unique posttranslationally modified histidine	1	141.886	1.98628e-21	207.6	No known flanking GlyGly site, ratio may be meaningful	1.11641	1.00039		1.0568
1873	7	2001	YPL037C	EGD1	>YPL037C EGD1 SGDID:S000005958, Chr XVI from 481898-481425, reverse complement, Verified ORF, Subunit beta1 of the nascent polypeptide-associated complex (NAC) involved in protein targeting, associated with cytoplasmic ribosomes; enhances DNA binding of t	1	110.633	0.000968028	174.64	No known flanking GlyGly site, ratio may be meaningful	0.984189	1.08871	0.838993	0.965123	0.738187	0.639656	0.687158
1005	30	1013	YHR193C	EGD2	>YHR193C EGD2 SGDID:S000001236, Chr VIII from 488236-487712, reverse complement, Verified ORF, Alpha subunit of the heteromeric nascent polypeptide-associated complex (NAC) involved in protein sorting and translocation, associated with cytoplasmic ribosom	1	95.4772	0.000612507	134.81	No known flanking GlyGly site, ratio may be meaningful	1.1932	1.05157	0.763885	0.985962
1006	156	1013	YHR193C	EGD2	>YHR193C EGD2 SGDID:S000001236, Chr VIII from 488236-487712, reverse complement, Verified ORF, Alpha subunit of the heteromeric nascent polypeptide-associated complex (NAC) involved in protein sorting and translocation, associated with cytoplasmic ribosom	1	105.136	0.0741707	105.14	No known flanking GlyGly site, ratio may be meaningful
222	343	208	YBR177C	EHT1	>YBR177C EHT1 SGDID:S000000381, Chr II from 586157-584802, reverse complement, Verified ORF, Acyl-coenzymeA:ethanol O-acyltransferase that plays a minor role in medium-chain fatty acid ethyl ester biosynthesis; possesses short-chain esterase activity; loc	1	152.68	1.41501e-05	152.68	No known flanking GlyGly site, ratio may be meaningful	0.729989			0.729989
1324	147	1398	YLR186W	EMG1	>YLR186W EMG1 SGDID:S000004176, Chr XII from 523634-524392, Verified ORF, Member of the alpha/beta knot fold methyltransferase superfamily; required for maturation of 18S rRNA and for 40S ribosome production; interacts with RNA and with S-adenosylmethioni	1	42.682	0.00777254	62.287	No flanking Lys, ratio valid		0.774666		0.774666	1.45832		1.45832
441	581	416	YDR040C	ENA1	>YDR040C ENA1 SGDID:S000002447, Chr IV from 538465-535190, reverse complement, Verified ORF, P-type ATPase sodium pump, involved in Na+ and Li+ efflux to allow salt tolerance;>YDR039C ENA2 SGDID:S000002446, Chr IV from 534580-531305, reverse complement,	1	99.3923	0.000130285	168.22	No known flanking GlyGly site, ratio may be meaningful
926	126	910	YGR254W	ENO1	>YGR254W ENO1 SGDID:S000003486, Chr VII from 1000932-1002245, Verified ORF, Enolase I, a phosphopyruvate hydratase that catalyzes the conversion of 2-phosphoglycerate to phosphoenolpyruvate during glycolysis and the reverse reaction during gluconeogenesis	1	109.714	0.00938924	109.71	Known Flanking GlyGly site, ratio meaningless
927	132	910	YGR254W	ENO1	>YGR254W ENO1 SGDID:S000003486, Chr VII from 1000932-1002245, Verified ORF, Enolase I, a phosphopyruvate hydratase that catalyzes the conversion of 2-phosphoglycerate to phosphoenolpyruvate during glycolysis and the reverse reaction during gluconeogenesis	1	79.3463	0.00028047	169.12	Known Flanking GlyGly site, ratio meaningless
928	346;346	910;1008	YGR254W;YHR174W	ENO1	>YGR254W ENO1 SGDID:S000003486, Chr VII from 1000932-1002245, Verified ORF, Enolase I, a phosphopyruvate hydratase that catalyzes the conversion of 2-phosphoglycerate to phosphoenolpyruvate during glycolysis and the reverse reaction during gluconeogenesis	1	188.157	0.000351621	199.05	Known Flanking GlyGly site, ratio meaningless
929	5;5	910;1008	YGR254W;YHR174W	ENO1	>YGR254W ENO1 SGDID:S000003486, Chr VII from 1000932-1002245, Verified ORF, Enolase I, a phosphopyruvate hydratase that catalyzes the conversion of 2-phosphoglycerate to phosphoenolpyruvate during glycolysis and the reverse reaction during gluconeogenesis	1	94.1632	0.0130622	94.163	No flanking Lys, ratio valid		0.922938		0.922938	0.997532	0.995296	0.996414
930	195;195	910;1008	YGR254W;YHR174W	ENO1	>YGR254W ENO1 SGDID:S000003486, Chr VII from 1000932-1002245, Verified ORF, Enolase I, a phosphopyruvate hydratase that catalyzes the conversion of 2-phosphoglycerate to phosphoenolpyruvate during glycolysis and the reverse reaction during gluconeogenesis	1	137.092	0.000209031	190.62	No known flanking GlyGly site, ratio may be meaningful	1.13648	1.27831		1.20531
931	338;338	910;1008	YGR254W;YHR174W	ENO1	>YGR254W ENO1 SGDID:S000003486, Chr VII from 1000932-1002245, Verified ORF, Enolase I, a phosphopyruvate hydratase that catalyzes the conversion of 2-phosphoglycerate to phosphoenolpyruvate during glycolysis and the reverse reaction during gluconeogenesis	1	79.659	0.00912273	79.659	Known Flanking GlyGly site, ratio meaningless
932	409;409	910;1008	YGR254W;YHR174W	ENO1	>YGR254W ENO1 SGDID:S000003486, Chr VII from 1000932-1002245, Verified ORF, Enolase I, a phosphopyruvate hydratase that catalyzes the conversion of 2-phosphoglycerate to phosphoenolpyruvate during glycolysis and the reverse reaction during gluconeogenesis	1	66.7992	0.00070195	148.94	No flanking Lys, ratio valid	0.87956	0.934411		0.906571
933	397;397	910;1008	YGR254W;YHR174W	ENO1	>YGR254W ENO1 SGDID:S000003486, Chr VII from 1000932-1002245, Verified ORF, Enolase I, a phosphopyruvate hydratase that catalyzes the conversion of 2-phosphoglycerate to phosphoenolpyruvate during glycolysis and the reverse reaction during gluconeogenesis	1	202.295	0.000229207	202.29	No flanking Lys, ratio valid	0.869575	0.833682	0.969478	0.889096	0.920941	0.790207	0.853073
386	385	367	YDL161W	ENT1	>YDL161W ENT1 SGDID:S000002320, Chr IV from 167715-169079, Verified ORF, Epsin-like protein involved in endocytosis and actin patch assembly and functionally redundant with Ent2p; binds clathrin via a clathrin-binding domain motif at C-terminus	1	47.8216	0.0292808	47.822	No flanking Lys, ratio valid	0.783133			0.783133
387	354	367	YDL161W	ENT1	>YDL161W ENT1 SGDID:S000002320, Chr IV from 167715-169079, Verified ORF, Epsin-like protein involved in endocytosis and actin patch assembly and functionally redundant with Ent2p; binds clathrin via a clathrin-binding domain motif at C-terminus	1	90.6009	0.00286048	90.601	No known flanking GlyGly site, ratio may be meaningful	1.16603			1.16603
1328	381	1405	YLR206W	ENT2	>YLR206W ENT2 SGDID:S000004196, Chr XII from 554580-556421, Verified ORF, Epsin-like protein required for endocytosis and actin patch assembly and functionally redundant with Ent1p; contains clathrin-binding motif at C-terminus	1	154.357	0.000187758	154.36	No flanking Lys, ratio valid	0.769069			0.769069
1329	426	1405	YLR206W	ENT2	>YLR206W ENT2 SGDID:S000004196, Chr XII from 554580-556421, Verified ORF, Epsin-like protein required for endocytosis and actin patch assembly and functionally redundant with Ent1p; contains clathrin-binding motif at C-terminus	1	54.5808	0.000201004	57.484	No flanking Lys, ratio valid	1.21648			1.21648
1150	350	1207	YJR125C	ENT3	>YJR125C ENT3 SGDID:S000003886, Chr X from 655954-654728, reverse complement, Verified ORF, Protein containing an N-terminal epsin-like domain involved in clathrin recruitment and traffic between the Golgi and endosomes; associates with the clathrin adapt	1	73.8019	0.0585568	74.78	No known flanking GlyGly site, ratio may be meaningful		0.869069	1.08525	0.971164		0.722083	0.722083
1151	184	1207	YJR125C	ENT3	>YJR125C ENT3 SGDID:S000003886, Chr X from 655954-654728, reverse complement, Verified ORF, Protein containing an N-terminal epsin-like domain involved in clathrin recruitment and traffic between the Golgi and endosomes; associates with the clathrin adapt	1	251.739	7.84046e-07	271.73	No known flanking GlyGly site, ratio may be meaningful	1.76611	1.15608	1.61746	1.48918
1152	16	1207	YJR125C	ENT3	>YJR125C ENT3 SGDID:S000003886, Chr X from 655954-654728, reverse complement, Verified ORF, Protein containing an N-terminal epsin-like domain involved in clathrin recruitment and traffic between the Golgi and endosomes; associates with the clathrin adapt	1	72.4277	0.000120742	163.62	No known flanking GlyGly site, ratio may be meaningful	1.19944			1.19944
1025	696	1025	YIL005W	EPS1	>YIL005W EPS1 SGDID:S000001267, Chr IX from 345689-347794, Verified ORF, ER protein with chaperone and co-chaperone activity, involved in retention of resident ER proteins; has a role in recognizing proteins targeted for ER-associated degradation (ERAD),	1	120.574	5.47946e-05	120.57	No known flanking GlyGly site, ratio may be meaningful
1465	127	1561	YMR049C	ERB1	>YMR049C ERB1 SGDID:S000004652, Chr XIII from 370516-368093, reverse complement, Verified ORF, Protein required for maturation of the 25S and 5.8S ribosomal RNAs; constituent of 66S pre-ribosomal particles; homologous to mammalian Bop1	1	238.828	0.000133762	319.91	No known flanking GlyGly site, ratio may be meaningful	0.662692			0.662692
885	414	877	YGR175C	ERG1	>YGR175C ERG1 SGDID:S000003407, Chr VII from 848428-846938, reverse complement, Verified ORF, Squalene epoxidase, catalyzes the epoxidation of squalene to 2,3-oxidosqualene; plays an essential role in the ergosterol-biosynthesis pathway and is the specifi	1	82.2405	0.0233189	82.241	Known Flanking GlyGly site, ratio meaningless
886	418	877	YGR175C	ERG1	>YGR175C ERG1 SGDID:S000003407, Chr VII from 848428-846938, reverse complement, Verified ORF, Squalene epoxidase, catalyzes the epoxidation of squalene to 2,3-oxidosqualene; plays an essential role in the ergosterol-biosynthesis pathway and is the specifi	1	99.3838	0.00439116	99.384	Known Flanking GlyGly site, ratio meaningless
887	311	877	YGR175C	ERG1	>YGR175C ERG1 SGDID:S000003407, Chr VII from 848428-846938, reverse complement, Verified ORF, Squalene epoxidase, catalyzes the epoxidation of squalene to 2,3-oxidosqualene; plays an essential role in the ergosterol-biosynthesis pathway and is the specifi	1	76.8677	7.47281e-11	365.19	No flanking Lys, ratio valid	1.3454	1.5179	1.56504	1.47302	1.0172		1.0172
888	289	877	YGR175C	ERG1	>YGR175C ERG1 SGDID:S000003407, Chr VII from 848428-846938, reverse complement, Verified ORF, Squalene epoxidase, catalyzes the epoxidation of squalene to 2,3-oxidosqualene; plays an essential role in the ergosterol-biosynthesis pathway and is the specifi	1	202.003	7.19802e-05	202	Known Flanking GlyGly site, ratio meaningless
889	284	877	YGR175C	ERG1	>YGR175C ERG1 SGDID:S000003407, Chr VII from 848428-846938, reverse complement, Verified ORF, Squalene epoxidase, catalyzes the epoxidation of squalene to 2,3-oxidosqualene; plays an essential role in the ergosterol-biosynthesis pathway and is the specifi	1	84.1883	0.000275756	215.72	Known Flanking GlyGly site, ratio meaningless
1871	213	1998	YPL028W	ERG10	>YPL028W ERG10 SGDID:S000005949, Chr XVI from 498094-499290, Verified ORF, Acetyl-CoA C-acetyltransferase (acetoacetyl-CoA thiolase), cytosolic enzyme that transfers an acetyl group from one acetyl-CoA molecule to another, forming acetoacetyl-CoA; involve	0.999999	59.0643	0.00245809	99.788	No known flanking GlyGly site, ratio may be meaningful	1.08506			1.08506
963	215	944	YHR007C	ERG11	>YHR007C ERG11 SGDID:S000001049, Chr VIII from 121678-120086, reverse complement, Verified ORF, Lanosterol 14-alpha-demethylase, catalyzes the C-14 demethylation of lanosterol to form 4,4''-dimethyl cholesta-8,14,24-triene-3-beta-ol in the ergosterol bios	1	104.747	1.00314e-32	195.79	No flanking Lys, ratio valid	0.507774	0.376136	0.754668	0.524313	0.38818	0.336931	0.361649
1450	263	1543	YML126C	ERG13	>YML126C ERG13 SGDID:S000004595, Chr XIII from 20536-19061, reverse complement, Verified ORF, 3-hydroxy-3-methylglutaryl-CoA (HMG-CoA) synthase, catalyzes the formation of HMG-CoA from acetyl-CoA and acetoacetyl-CoA; involved in the second step in mevalon	1	147.909	0.00071802	147.91	No known flanking GlyGly site, ratio may be meaningful	1.00262		0.816104	0.904568
1451	305	1543	YML126C	ERG13	>YML126C ERG13 SGDID:S000004595, Chr XIII from 20536-19061, reverse complement, Verified ORF, 3-hydroxy-3-methylglutaryl-CoA (HMG-CoA) synthase, catalyzes the formation of HMG-CoA from acetyl-CoA and acetoacetyl-CoA; involved in the second step in mevalon	1	60.7879	0.000319159	157.21	Known Flanking GlyGly site, ratio meaningless
1452	301	1543	YML126C	ERG13	>YML126C ERG13 SGDID:S000004595, Chr XIII from 20536-19061, reverse complement, Verified ORF, 3-hydroxy-3-methylglutaryl-CoA (HMG-CoA) synthase, catalyzes the formation of HMG-CoA from acetyl-CoA and acetoacetyl-CoA; involved in the second step in mevalon	1	74.6109	0.0464663	74.611	Known Flanking GlyGly site, ratio meaningless
1300	291	1376	YLR100W	ERG27	>YLR100W ERG27 SGDID:S000004090, Chr XII from 341811-342854, Verified ORF, 3-keto sterol reductase, catalyzes the last of three steps required to remove two C-4 methyl groups from an intermediate in ergosterol biosynthesis; mutants are sterol auxotrophs	1	88.3697	7.97413e-11	90.601	No known flanking GlyGly site, ratio may be meaningful
1301	327	1376	YLR100W	ERG27	>YLR100W ERG27 SGDID:S000004090, Chr XII from 341811-342854, Verified ORF, 3-keto sterol reductase, catalyzes the last of three steps required to remove two C-4 methyl groups from an intermediate in ergosterol biosynthesis; mutants are sterol auxotrophs	1	181.598	0.000693056	181.6	No known flanking GlyGly site, ratio may be meaningful
1413	56	1493	YML008C	ERG6	>YML008C ERG6 SGDID:S000004467, Chr XIII from 252990-251839, reverse complement, Verified ORF, Delta(24)-sterol C-methyltransferase, converts zymosterol to fecosterol in the ergosterol biosynthetic pathway by methylating position C-24; localized to both l	1	89.46	6.47289e-05	245.5	No flanking Lys, ratio valid	1.10666	0.729327		0.898398
1414	34	1493	YML008C	ERG6	>YML008C ERG6 SGDID:S000004467, Chr XIII from 252990-251839, reverse complement, Verified ORF, Delta(24)-sterol C-methyltransferase, converts zymosterol to fecosterol in the ergosterol biosynthetic pathway by methylating position C-24; localized to both l	1	80.9162	0.0364074	80.916	No known flanking GlyGly site, ratio may be meaningful
983	628	974	YHR072W	ERG7	>YHR072W ERG7 SGDID:S000001114, Chr VIII from 239100-241295, Verified ORF, Lanosterol synthase, an essential enzyme that catalyzes the cyclization of squalene 2,3-epoxide, a step in ergosterol biosynthesis	1	163.382	8.60886e-05	207.83	No known flanking GlyGly site, ratio may be meaningful
77	37	92	YAR002C-A	ERP1	>YAR002C-A ERP1 SGDID:S000002129, Chr I from 154726-154067, reverse complement, Verified ORF, Protein that forms a heterotrimeric complex with Erp2p, Emp24p, and Erv25p; member, along with Emp24p and Erv25p, of the p24 family involved in ER to Golgi trans	1	154.118	0.0018091	154.12	No known flanking GlyGly site, ratio may be meaningful	1.94292			1.94292
740	34	738	YGL002W	ERP6	>YGL002W ERP6 SGDID:S000002970, Chr VII from 494521-495171, Verified ORF, Protein with similarity to Emp24p and Erv25p, member of the p24 family involved in ER to Golgi transport; the authentic, non-tagged protein is detected in highly purified mitochondr	1	92.9789	0.00083203	228.12	No known flanking GlyGly site, ratio may be meaningful
1966	42	2091	YPR037C	ERV2	>YPR037C ERV2 SGDID:S000006241, Chr XVI from 647035-646445, reverse complement, Verified ORF, Flavin-linked sulfhydryl oxidase localized to the endoplasmic reticulum lumen, involved in disulfide bond formation within the ER	1	164.814	2.20043e-23	282.09	Known Flanking GlyGly site, ratio meaningless
1967	55	2091	YPR037C	ERV2	>YPR037C ERV2 SGDID:S000006241, Chr XVI from 647035-646445, reverse complement, Verified ORF, Flavin-linked sulfhydryl oxidase localized to the endoplasmic reticulum lumen, involved in disulfide bond formation within the ER	1	211.133	3.6653e-05	247.5	Known Flanking GlyGly site, ratio meaningless
1428	5	1514	YML067C	ERV41	>YML067C ERV41 SGDID:S000004532, Chr XIII from 140214-140184,140090-139063, reverse complement, Verified ORF, Protein localized to COPII-coated vesicles, forms a complex with Erv46p; involved in the membrane fusion stage of transport; has homology to huma	1	132.01	0.00229393	132.01	No known flanking GlyGly site, ratio may be meaningful
1429	345	1514	YML067C	ERV41	>YML067C ERV41 SGDID:S000004532, Chr XIII from 140214-140184,140090-139063, reverse complement, Verified ORF, Protein localized to COPII-coated vesicles, forms a complex with Erv46p; involved in the membrane fusion stage of transport; has homology to huma	0.500067	0.00116654	0.000941125	185.95	No known flanking GlyGly site, ratio may be meaningful
1838	216	1973	YOR317W	FAA1	>YOR317W FAA1 SGDID:S000005844, Chr XV from 909340-911442, Verified ORF, Long chain fatty acyl-CoA synthetase with a preference for C12:0-C16:0 fatty acids; involved in the activation of imported fatty acids; localized to both lipid particles and mitochon	1	80.2397	0.0685671	80.24	No flanking Lys, ratio valid
1839	11	1973	YOR317W	FAA1	>YOR317W FAA1 SGDID:S000005844, Chr XV from 909340-911442, Verified ORF, Long chain fatty acyl-CoA synthetase with a preference for C12:0-C16:0 fatty acids; involved in the activation of imported fatty acids; localized to both lipid particles and mitochon	1	48.5269	0.015699	48.527	No flanking Lys, ratio valid	0.768096	0.899912	0.99517	0.88275
1536	118	1640	YMR246W	FAA4	>YMR246W FAA4 SGDID:S000004860, Chr XIII from 759806-761890, Verified ORF, Long chain fatty acyl-CoA synthetase, regulates protein modification during growth in the presence of ethanol, functions to incorporate palmitic acid into phospholipids and neutral	1	99.9195	0.000870347	119.22	No known flanking GlyGly site, ratio may be meaningful	0.348166		0.929423	0.568853
1537	496	1640	YMR246W	FAA4	>YMR246W FAA4 SGDID:S000004860, Chr XIII from 759806-761890, Verified ORF, Long chain fatty acyl-CoA synthetase, regulates protein modification during growth in the presence of ethanol, functions to incorporate palmitic acid into phospholipids and neutral	1	212.554	4.38761e-07	212.55	No known flanking GlyGly site, ratio may be meaningful
1538	541	1640	YMR246W	FAA4	>YMR246W FAA4 SGDID:S000004860, Chr XIII from 759806-761890, Verified ORF, Long chain fatty acyl-CoA synthetase, regulates protein modification during growth in the presence of ethanol, functions to incorporate palmitic acid into phospholipids and neutral	1	227.923	5.28479e-05	229.82	No known flanking GlyGly site, ratio may be meaningful	0.686973		0.754014	0.719713
1217	877	1284	YKL182W	FAS1	>YKL182W FAS1 SGDID:S000001665, Chr XI from 100676-106831, Verified ORF, Beta subunit of fatty acid synthetase, which catalyzes the synthesis of long-chain saturated fatty acids; contains acetyltransacylase, dehydratase, enoyl reductase, malonyl transacyl	1	160.464	0.000205986	160.46	Known Flanking GlyGly site, ratio meaningless
1218	879	1284	YKL182W	FAS1	>YKL182W FAS1 SGDID:S000001665, Chr XI from 100676-106831, Verified ORF, Beta subunit of fatty acid synthetase, which catalyzes the synthesis of long-chain saturated fatty acids; contains acetyltransacylase, dehydratase, enoyl reductase, malonyl transacyl	1	83.8502	0.00244778	124.42	Known Flanking GlyGly site, ratio meaningless
1219	887	1284	YKL182W	FAS1	>YKL182W FAS1 SGDID:S000001665, Chr XI from 100676-106831, Verified ORF, Beta subunit of fatty acid synthetase, which catalyzes the synthesis of long-chain saturated fatty acids; contains acetyltransacylase, dehydratase, enoyl reductase, malonyl transacyl	1	84.2814	1.38046e-05	324.84	Known Flanking GlyGly site, ratio meaningless
1220	2017	1284	YKL182W	FAS1	>YKL182W FAS1 SGDID:S000001665, Chr XI from 100676-106831, Verified ORF, Beta subunit of fatty acid synthetase, which catalyzes the synthesis of long-chain saturated fatty acids; contains acetyltransacylase, dehydratase, enoyl reductase, malonyl transacyl	1	76.1579	0.00030394	191.17	No known flanking GlyGly site, ratio may be meaningful	1.04878	0.724505		0.87169
1221	706	1284	YKL182W	FAS1	>YKL182W FAS1 SGDID:S000001665, Chr XI from 100676-106831, Verified ORF, Beta subunit of fatty acid synthetase, which catalyzes the synthesis of long-chain saturated fatty acids; contains acetyltransacylase, dehydratase, enoyl reductase, malonyl transacyl	1	64.8427	0.0429645	64.843	No known flanking GlyGly site, ratio may be meaningful	0.711124			0.711124
1933	560	2061	YPL231W	FAS2	>YPL231W FAS2 SGDID:S000006152, Chr XVI from 108652-114315, Verified ORF, Alpha subunit of fatty acid synthetase, which catalyzes the synthesis of long-chain saturated fatty acids; contains beta-ketoacyl reductase and beta-ketoacyl synthase activities; ph	1	266.452	9.96171e-05	266.45	No known flanking GlyGly site, ratio may be meaningful	0.508574			0.508574
1934	996	2061	YPL231W	FAS2	>YPL231W FAS2 SGDID:S000006152, Chr XVI from 108652-114315, Verified ORF, Alpha subunit of fatty acid synthetase, which catalyzes the synthesis of long-chain saturated fatty acids; contains beta-ketoacyl reductase and beta-ketoacyl synthase activities; ph	0.887939	8.98928	0.00438154	84.753	Known Flanking GlyGly site, ratio meaningless
1935	999	2061	YPL231W	FAS2	>YPL231W FAS2 SGDID:S000006152, Chr XVI from 108652-114315, Verified ORF, Alpha subunit of fatty acid synthetase, which catalyzes the synthesis of long-chain saturated fatty acids; contains beta-ketoacyl reductase and beta-ketoacyl synthase activities; ph	0.999997	55.0813	0.000406984	171.08	Known Flanking GlyGly site, ratio meaningless
1936	1736	2061	YPL231W	FAS2	>YPL231W FAS2 SGDID:S000006152, Chr XVI from 108652-114315, Verified ORF, Alpha subunit of fatty acid synthetase, which catalyzes the synthesis of long-chain saturated fatty acids; contains beta-ketoacyl reductase and beta-ketoacyl synthase activities; ph	1	96.665	3.0398e-20	244.73	No known flanking GlyGly site, ratio may be meaningful	0.901524	0.798331	1.01494	0.900603	0.875422	1.35916	1.0908
1937	1826	2061	YPL231W	FAS2	>YPL231W FAS2 SGDID:S000006152, Chr XVI from 108652-114315, Verified ORF, Alpha subunit of fatty acid synthetase, which catalyzes the synthesis of long-chain saturated fatty acids; contains beta-ketoacyl reductase and beta-ketoacyl synthase activities; ph	0.999998	57.267	0.001099	105.17	No known flanking GlyGly site, ratio may be meaningful	0.608271			0.608271
1938	505	2061	YPL231W	FAS2	>YPL231W FAS2 SGDID:S000006152, Chr XVI from 108652-114315, Verified ORF, Alpha subunit of fatty acid synthetase, which catalyzes the synthesis of long-chain saturated fatty acids; contains beta-ketoacyl reductase and beta-ketoacyl synthase activities; ph	1	141.296	0.00198221	210.08	No known flanking GlyGly site, ratio may be meaningful	0.737662	0.777893	0.636293	0.714735
1939	1844	2061	YPL231W	FAS2	>YPL231W FAS2 SGDID:S000006152, Chr XVI from 108652-114315, Verified ORF, Alpha subunit of fatty acid synthetase, which catalyzes the synthesis of long-chain saturated fatty acids; contains beta-ketoacyl reductase and beta-ketoacyl synthase activities; ph	1	62.6328	0.00107936	148.41	No known flanking GlyGly site, ratio may be meaningful	0.486074	0.720756	0.723803	0.632951
1940	37	2061	YPL231W	FAS2	>YPL231W FAS2 SGDID:S000006152, Chr XVI from 108652-114315, Verified ORF, Alpha subunit of fatty acid synthetase, which catalyzes the synthesis of long-chain saturated fatty acids; contains beta-ketoacyl reductase and beta-ketoacyl synthase activities; ph	1	112.845	0.000838935	112.85	No flanking Lys, ratio valid	0.75177			0.75177
1941	1446	2061	YPL231W	FAS2	>YPL231W FAS2 SGDID:S000006152, Chr XVI from 108652-114315, Verified ORF, Alpha subunit of fatty acid synthetase, which catalyzes the synthesis of long-chain saturated fatty acids; contains beta-ketoacyl reductase and beta-ketoacyl synthase activities; ph	1	68.2235	0.00474625	87.696	No known flanking GlyGly site, ratio may be meaningful	0.850353			0.850353
1177	73	1239	YKL060C	FBA1	>YKL060C FBA1 SGDID:S000001543, Chr XI from 327131-326052, reverse complement, Verified ORF, Fructose 1,6-bisphosphate aldolase, required for glycolysis and gluconeogenesis; catalyzes conversion of fructose 1,6 bisphosphate to glyceraldehyde-3-P and dihyd	1	157.605	4.15898e-06	157.61	Known Flanking GlyGly site, ratio meaningless
1178	85	1239	YKL060C	FBA1	>YKL060C FBA1 SGDID:S000001543, Chr XI from 327131-326052, reverse complement, Verified ORF, Fructose 1,6-bisphosphate aldolase, required for glycolysis and gluconeogenesis; catalyzes conversion of fructose 1,6 bisphosphate to glyceraldehyde-3-P and dihyd	1	72.5639	1.47963e-05	135.49	Known Flanking GlyGly site, ratio meaningless
1179	323	1239	YKL060C	FBA1	>YKL060C FBA1 SGDID:S000001543, Chr XI from 327131-326052, reverse complement, Verified ORF, Fructose 1,6-bisphosphate aldolase, required for glycolysis and gluconeogenesis; catalyzes conversion of fructose 1,6 bisphosphate to glyceraldehyde-3-P and dihyd	0.883182	8.78541	0.00317157	69.612	Known Flanking GlyGly site, ratio meaningless
1180	326	1239	YKL060C	FBA1	>YKL060C FBA1 SGDID:S000001543, Chr XI from 327131-326052, reverse complement, Verified ORF, Fructose 1,6-bisphosphate aldolase, required for glycolysis and gluconeogenesis; catalyzes conversion of fructose 1,6 bisphosphate to glyceraldehyde-3-P and dihyd	0.99892	29.6605	0.000492667	118.23	Known Flanking GlyGly site, ratio meaningless
1181	345	1239	YKL060C	FBA1	>YKL060C FBA1 SGDID:S000001543, Chr XI from 327131-326052, reverse complement, Verified ORF, Fructose 1,6-bisphosphate aldolase, required for glycolysis and gluconeogenesis; catalyzes conversion of fructose 1,6 bisphosphate to glyceraldehyde-3-P and dihyd	1	127.658	0.000104809	170.96	Known Flanking GlyGly site, ratio meaningless
1182	348	1239	YKL060C	FBA1	>YKL060C FBA1 SGDID:S000001543, Chr XI from 327131-326052, reverse complement, Verified ORF, Fructose 1,6-bisphosphate aldolase, required for glycolysis and gluconeogenesis; catalyzes conversion of fructose 1,6 bisphosphate to glyceraldehyde-3-P and dihyd	1	114.858	7.56719e-05	163.84	Known Flanking GlyGly site, ratio meaningless
1183	255	1239	YKL060C	FBA1	>YKL060C FBA1 SGDID:S000001543, Chr XI from 327131-326052, reverse complement, Verified ORF, Fructose 1,6-bisphosphate aldolase, required for glycolysis and gluconeogenesis; catalyzes conversion of fructose 1,6 bisphosphate to glyceraldehyde-3-P and dihyd	0.762798	5.07292	8.58501e-05	46.247	No known flanking GlyGly site, ratio may be meaningful	1.13872			1.13872
1184	8	1239	YKL060C	FBA1	>YKL060C FBA1 SGDID:S000001543, Chr XI from 327131-326052, reverse complement, Verified ORF, Fructose 1,6-bisphosphate aldolase, required for glycolysis and gluconeogenesis; catalyzes conversion of fructose 1,6 bisphosphate to glyceraldehyde-3-P and dihyd	1	73.6163	0.00150225	172.03	No flanking Lys, ratio valid	0.83135	0.798512	0.787306	0.805508	0.669559		0.669559
1185	114	1239	YKL060C	FBA1	>YKL060C FBA1 SGDID:S000001543, Chr XI from 327131-326052, reverse complement, Verified ORF, Fructose 1,6-bisphosphate aldolase, required for glycolysis and gluconeogenesis; catalyzes conversion of fructose 1,6 bisphosphate to glyceraldehyde-3-P and dihyd	1	42.044	0.00762558	54.073	No known flanking GlyGly site, ratio may be meaningful	0.813212	0.697828		0.753314
1186	27	1239	YKL060C	FBA1	>YKL060C FBA1 SGDID:S000001543, Chr XI from 327131-326052, reverse complement, Verified ORF, Fructose 1,6-bisphosphate aldolase, required for glycolysis and gluconeogenesis; catalyzes conversion of fructose 1,6 bisphosphate to glyceraldehyde-3-P and dihyd	1	115.57	9.37151e-05	135.95	No known flanking GlyGly site, ratio may be meaningful	0.818817	0.794126	0.814978	0.809234
633	16	629	YER056C	FCY2	>YER056C FCY2 SGDID:S000000858, Chr V from 268112-266511, reverse complement, Verified ORF, Purine-cytosine permease, mediates purine (adenine, guanine, and hypoxanthine) and cytosine accumulation	1	236.081	7.38159e-36	445.2	No flanking Lys, ratio valid
634	29	629	YER056C	FCY2	>YER056C FCY2 SGDID:S000000858, Chr V from 268112-266511, reverse complement, Verified ORF, Purine-cytosine permease, mediates purine (adenine, guanine, and hypoxanthine) and cytosine accumulation	1	237.758	2.84527e-59	297.03	No known flanking GlyGly site, ratio may be meaningful
636	30	632	YER060W	FCY21	>YER060W FCY21 SGDID:S000000862, Chr V from 274565-276151, Verified ORF, Putative purine-cytosine permease, very similar to Fcy2p but cannot substitute for its function	1	130.77	0.000420504	137.36	No known flanking GlyGly site, ratio may be meaningful
637	20	632	YER060W	FCY21	>YER060W FCY21 SGDID:S000000862, Chr V from 274565-276151, Verified ORF, Putative purine-cytosine permease, very similar to Fcy2p but cannot substitute for its function	1	114.721	0.00071955	197.21	No known flanking GlyGly site, ratio may be meaningful
305	6	277	YCR028C	FEN2	>YCR028C FEN2 SGDID:S000000623, Chr III from 172420-170882, reverse complement, Verified ORF, Plasma membrane H+-pantothenate symporter; confers sensitivity to the antifungal agent fenpropimorph	0.997746	26.4614	0.00849761	66.246	No known flanking GlyGly site, ratio may be meaningful
175	3	177	YBR101C	FES1	>YBR101C FES1 SGDID:S000000305, Chr II from 444687-443815, reverse complement, Verified ORF, Hsp70 (Ssa1p) nucleotide exchange factor, cytosolic homolog of Sil1p, which is the nucleotide exchange factor for BiP (Kar2p) in the endoplasmic reticulum	1	124.272	6.90413e-10	196.65	No known flanking GlyGly site, ratio may be meaningful	0.755329			0.755329
1467	625	1564	YMR058W	FET3	>YMR058W FET3 SGDID:S000004662, Chr XIII from 388821-390731, Verified ORF, Ferro-O2-oxidoreductase required for high-affinity iron uptake and involved in mediating resistance to copper ion toxicity, belongs to class of integral membrane multicopper oxidas	1	88.1551	0.000405297	224.36	No known flanking GlyGly site, ratio may be meaningful
1565	39	1674	YMR319C	FET4	>YMR319C FET4 SGDID:S000004938, Chr XIII from 914536-912878, reverse complement, Verified ORF, Low-affinity Fe(II) transporter of the plasma membrane	1	352.596	1.77609e-05	442.7	No known flanking GlyGly site, ratio may be meaningful
1375	413	1448	YLR342W	FKS1	>YLR342W FKS1 SGDID:S000004334, Chr XII from 809997-815627, Verified ORF, Catalytic subunit of 1,3-beta-D-glucan synthase, functionally redundant with alternate catalytic subunit Gsc2p; binds to regulatory subunit Rho1p; involved in cell wall synthesis an	1	70.7284	0.0814156	70.728	No known flanking GlyGly site, ratio may be meaningful	0.500412			0.500412
1376	259	1448	YLR342W	FKS1	>YLR342W FKS1 SGDID:S000004334, Chr XII from 809997-815627, Verified ORF, Catalytic subunit of 1,3-beta-D-glucan synthase, functionally redundant with alternate catalytic subunit Gsc2p; binds to regulatory subunit Rho1p; involved in cell wall synthesis an	0.999816	37.359	8.10569e-05	70.391	No known flanking GlyGly site, ratio may be meaningful	0.667701			0.667701
1377	1539	1448	YLR342W	FKS1	>YLR342W FKS1 SGDID:S000004334, Chr XII from 809997-815627, Verified ORF, Catalytic subunit of 1,3-beta-D-glucan synthase, functionally redundant with alternate catalytic subunit Gsc2p; binds to regulatory subunit Rho1p; involved in cell wall synthesis an	1	76.7151	0.00237522	240.5	Known Flanking GlyGly site, ratio meaningless
1378	1547	1448	YLR342W	FKS1	>YLR342W FKS1 SGDID:S000004334, Chr XII from 809997-815627, Verified ORF, Catalytic subunit of 1,3-beta-D-glucan synthase, functionally redundant with alternate catalytic subunit Gsc2p; binds to regulatory subunit Rho1p; involved in cell wall synthesis an	1	126.705	0.000577028	295.29	Known Flanking GlyGly site, ratio meaningless
1379	787	1448	YLR342W	FKS1	>YLR342W FKS1 SGDID:S000004334, Chr XII from 809997-815627, Verified ORF, Catalytic subunit of 1,3-beta-D-glucan synthase, functionally redundant with alternate catalytic subunit Gsc2p; binds to regulatory subunit Rho1p; involved in cell wall synthesis an	1	102.389	1.9949e-11	274.45	No known flanking GlyGly site, ratio may be meaningful	0.907854	1.05716	1.00621	0.988436
1380	245	1448	YLR342W	FKS1	>YLR342W FKS1 SGDID:S000004334, Chr XII from 809997-815627, Verified ORF, Catalytic subunit of 1,3-beta-D-glucan synthase, functionally redundant with alternate catalytic subunit Gsc2p; binds to regulatory subunit Rho1p; involved in cell wall synthesis an	1	163.844	4.39403e-05	163.84	No flanking Lys, ratio valid	2.33403		0.492319	1.07195
1926	598	2056	YPL221W	FLC1	>YPL221W FLC1 SGDID:S000006142, Chr XVI from 133042-135423, Verified ORF, Putative FAD transporter; required for uptake of FAD into endoplasmic reticulum; involved in cell wall maintenance	1	75.445	0.00703578	75.445	No known flanking GlyGly site, ratio may be meaningful
1927	783	2056	YPL221W	FLC1	>YPL221W FLC1 SGDID:S000006142, Chr XVI from 133042-135423, Verified ORF, Putative FAD transporter; required for uptake of FAD into endoplasmic reticulum; involved in cell wall maintenance	1	205.586	0.000714391	205.59	Known Flanking GlyGly site, ratio meaningless
1928	784	2056	YPL221W	FLC1	>YPL221W FLC1 SGDID:S000006142, Chr XVI from 133042-135423, Verified ORF, Putative FAD transporter; required for uptake of FAD into endoplasmic reticulum; involved in cell wall maintenance	1	56.4044	0.00215912	90.827	Known Flanking GlyGly site, ratio meaningless
1929	623	2056	YPL221W	FLC1	>YPL221W FLC1 SGDID:S000006142, Chr XVI from 133042-135423, Verified ORF, Putative FAD transporter; required for uptake of FAD into endoplasmic reticulum; involved in cell wall maintenance	1	90.8529	3.4073e-05	103.41	No known flanking GlyGly site, ratio may be meaningful
71	662	87	YAL053W	FLC2	>YAL053W FLC2 SGDID:S000000049, Chr I from 45900-48251, Verified ORF, Putative FAD transporter; required for uptake of FAD into endoplasmic reticulum; involved in cell wall maintenance	1	60.0927	2.78284e-05	92.906	No known flanking GlyGly site, ratio may be meaningful	1.30399			1.30399
72	671	87	YAL053W	FLC2	>YAL053W FLC2 SGDID:S000000049, Chr I from 45900-48251, Verified ORF, Putative FAD transporter; required for uptake of FAD into endoplasmic reticulum; involved in cell wall maintenance	1	51.2353	5.7342e-07	377.85	No flanking Lys, ratio valid	1.08203	0.447796	1.0576	0.800226
73	750	87	YAL053W	FLC2	>YAL053W FLC2 SGDID:S000000049, Chr I from 45900-48251, Verified ORF, Putative FAD transporter; required for uptake of FAD into endoplasmic reticulum; involved in cell wall maintenance	1	80.0216	7.09073e-13	218.68	No known flanking GlyGly site, ratio may be meaningful	1.04277	0.616974	1.09826	0.890675	0.511538	0.834337	0.653295
134	48	141	YBR008C	FLR1	>YBR008C FLR1 SGDID:S000000212, Chr II from 254210-252564, reverse complement, Verified ORF, Plasma membrane multidrug transporter of the major facilitator superfamily, involved in efflux of fluconazole, diazaborine, benomyl, methotrexate, and other drugs	1	99.9908	0.00131782	134.81	No known flanking GlyGly site, ratio may be meaningful
410	286	395	YDL222C	FMP45	>YDL222C FMP45 SGDID:S000002381, Chr IV from 61802-60873, reverse complement, Verified ORF, Integral membrane protein localized to mitochondria (untagged protein) and eisosomes, immobile patches at the cortex associated with endocytosis; sporulation and s	1	149.193	0.000346181	149.19	No flanking Lys, ratio valid
1617	42	1725	YNL135C	FPR1	>YNL135C FPR1 SGDID:S000005079, Chr XIV from 372228-371884, reverse complement, Verified ORF, Peptidyl-prolyl cis-trans isomerase (PPIase), binds to the drugs FK506 and rapamycin; also binds to the nonhistone chromatin binding protein Hmo1p and may regula	1	98.6761	0.000249689	98.676	No known flanking GlyGly site, ratio may be meaningful	0.732908			0.732908
1259	4	1337	YLL029W	FRA1	>YLL029W FRA1 SGDID:S000003952, Chr XII from 81460-83709, Verified ORF, Protein involved in negative regulation of transcription of iron regulon; forms an iron independent complex with Fra2p, Grx3p, and Grx4p; cytosolic; mutant fails to repress transcript	1	42.2873	0.00169207	73.841	No flanking Lys, ratio valid		0.982348	0.658335	0.804185
1287	431	1368	YLR060W	FRS1	>YLR060W FRS1 SGDID:S000004050, Chr XII from 260980-262767, Verified ORF, Beta subunit of cytoplasmic phenylalanyl-tRNA synthetase, forms a tetramer with Frs2p to generate active enzyme; sequence is evolutionarily distant from mitochondrial phenylalanyl-t	1	131.116	0.000616546	131.12	No known flanking GlyGly site, ratio may be meaningful	0.929778			0.929778
238	450	219	YBR207W	FTH1	>YBR207W FTH1 SGDID:S000000411, Chr II from 635141-636538, Verified ORF, Putative high affinity iron transporter involved in transport of intravacuolar stores of iron; forms complex with Fet5p; expression is regulated by iron; proposed to play indirect ro	1	86.4882	6.07534e-10	124.25	No flanking Lys, ratio valid
104	30	117	YBL042C	FUI1	>YBL042C FUI1 SGDID:S000000138, Chr II from 140263-138344, reverse complement, Verified ORF, High affinity uridine permease, localized to the plasma membrane; not involved in uracil transport	0.999997	55.8729	0.000114088	85.177	No known flanking GlyGly site, ratio may be meaningful
1944	58	2072	YPL262W	FUM1	>YPL262W FUM1 SGDID:S000006183, Chr XVI from 47336-48802, Verified ORF, Fumarase, converts fumaric acid to L-malic acid in the TCA cycle; cytosolic and mitochondrial localization determined by the N-terminal mitochondrial targeting sequence and protein co	1	122.459	0.00124392	219.92	No flanking Lys, ratio valid	0.790752	0.952049	1.10509	0.940516
100	273	103	YBL016W	FUS3	>YBL016W FUS3 SGDID:S000000112, Chr II from 192454-193515, Verified ORF, Mitogen-activated serine/threonine protein kinase involved in mating; phosphoactivated by Ste7p; substrates include Ste12p, Far1p, Bni1p, Sst2p; inhibits invasive growth during matin	1	119.507	0.00952795	119.51	No known flanking GlyGly site, ratio may be meaningful
223	398	209	YBR179C	FZO1	>YBR179C FZO1 SGDID:S000000383, Chr II from 589109-586542, reverse complement, Verified ORF, Mitochondrial integral membrane protein involved in mitochondrial fusion and maintenance of the mitochondrial genome; contains N-terminal GTPase domain	1	159.336	5.5501e-06	223.22	No flanking Lys, ratio valid
1235	9	1309	YKR039W	GAP1	>YKR039W GAP1 SGDID:S000001747, Chr XI from 514705-516513, Verified ORF, General amino acid permease; localization to the plasma membrane is regulated by nitrogen source	1	138.549	2.5041e-132	321.34	No known flanking GlyGly site, ratio may be meaningful		0.475821		0.475821
1482	415	1593	YMR136W	GAT2	>YMR136W GAT2 SGDID:S000004744, Chr XIII from 541198-542880, Verified ORF, Protein containing GATA family zinc finger motifs; similar to Gln3p and Dal80p; expression repressed by leucine	0.897765	9.43564	0.0132067	85.676	No known flanking GlyGly site, ratio may be meaningful
1578	148	1697	YNL062C	GCD10	>YNL062C GCD10 SGDID:S000005006, Chr XIV from 510213-508777, reverse complement, Verified ORF, Subunit of tRNA (1-methyladenosine) methyltransferase with Gcd14p, required for the modification of the adenine at position 58 in tRNAs, especially tRNAi-Met; f	1	75.6522	0.0290107	91.313	No known flanking GlyGly site, ratio may be meaningful	1.14199			1.14199
796	1754	798	YGL195W	GCN1	>YGL195W GCN1 SGDID:S000003163, Chr VII from 131531-139549, Verified ORF, Positive regulator of the Gcn2p kinase activity, forms a complex with Gcn20p; proposed to stimulate Gcn2p activation by an uncharged tRNA	1	119.68	0.000943283	119.68	No known flanking GlyGly site, ratio may be meaningful	0.635317			0.635317
417	194	399	YDL226C	GCS1	>YDL226C GCS1 SGDID:S000002385, Chr IV from 52174-51116, reverse complement, Verified ORF, ADP-ribosylation factor GTPase activating protein (ARF GAP), involved in ER-Golgi transport; shares functional similarity with Glo3p	1	119.406	0.000640653	119.41	No known flanking GlyGly site, ratio may be meaningful	1.75876			1.75876
418	182	399	YDL226C	GCS1	>YDL226C GCS1 SGDID:S000002385, Chr IV from 52174-51116, reverse complement, Verified ORF, ADP-ribosylation factor GTPase activating protein (ARF GAP), involved in ER-Golgi transport; shares functional similarity with Glo3p	1	82.8588	0.00332098	82.859	No known flanking GlyGly site, ratio may be meaningful	2.11113			2.11113
419	5	399	YDL226C	GCS1	>YDL226C GCS1 SGDID:S000002385, Chr IV from 52174-51116, reverse complement, Verified ORF, ADP-ribosylation factor GTPase activating protein (ARF GAP), involved in ER-Golgi transport; shares functional similarity with Glo3p	1	62.5281	1.1929e-07	155.26	No flanking Lys, ratio valid	1.16735	0.930801	0.714826	0.919221
420	220	399	YDL226C	GCS1	>YDL226C GCS1 SGDID:S000002385, Chr IV from 52174-51116, reverse complement, Verified ORF, ADP-ribosylation factor GTPase activating protein (ARF GAP), involved in ER-Golgi transport; shares functional similarity with Glo3p	1	206.463	0.0010241	206.46	No known flanking GlyGly site, ratio may be meaningful	0.88026			0.88026
1858	333	1990	YOR375C	GDH1	>YOR375C GDH1 SGDID:S000005902, Chr XV from 1043040-1041676, reverse complement, Verified ORF, NADP(+)-dependent glutamate dehydrogenase, synthesizes glutamate from ammonia and alpha-ketoglutarate; rate of alpha-ketoglutarate utilization differs from Gdh3	1	66.2607	4.50793e-14	148.52	Known Flanking GlyGly site, ratio meaningless
1859	426	1990	YOR375C	GDH1	>YOR375C GDH1 SGDID:S000005902, Chr XV from 1043040-1041676, reverse complement, Verified ORF, NADP(+)-dependent glutamate dehydrogenase, synthesizes glutamate from ammonia and alpha-ketoglutarate; rate of alpha-ketoglutarate utilization differs from Gdh3	1	190.261	8.71562e-06	204.62	Known Flanking GlyGly site, ratio meaningless
1860	433	1990	YOR375C	GDH1	>YOR375C GDH1 SGDID:S000005902, Chr XV from 1043040-1041676, reverse complement, Verified ORF, NADP(+)-dependent glutamate dehydrogenase, synthesizes glutamate from ammonia and alpha-ketoglutarate; rate of alpha-ketoglutarate utilization differs from Gdh3	1	226.095	0.00109871	270.19	Known Flanking GlyGly site, ratio meaningless
1861	74	1990	YOR375C	GDH1	>YOR375C GDH1 SGDID:S000005902, Chr XV from 1043040-1041676, reverse complement, Verified ORF, NADP(+)-dependent glutamate dehydrogenase, synthesizes glutamate from ammonia and alpha-ketoglutarate; rate of alpha-ketoglutarate utilization differs from Gdh3	1	154.011	0.000276921	206.46	Known Flanking GlyGly site, ratio meaningless
1862	404	1990	YOR375C	GDH1	>YOR375C GDH1 SGDID:S000005902, Chr XV from 1043040-1041676, reverse complement, Verified ORF, NADP(+)-dependent glutamate dehydrogenase, synthesizes glutamate from ammonia and alpha-ketoglutarate; rate of alpha-ketoglutarate utilization differs from Gdh3	1	109.881	1.01609e-10	401.87	No flanking Lys, ratio valid	0.115848	0.176491	0.3596	0.194451	0.237335	0.0902722	0.146372
1863	371	1990	YOR375C	GDH1	>YOR375C GDH1 SGDID:S000005902, Chr XV from 1043040-1041676, reverse complement, Verified ORF, NADP(+)-dependent glutamate dehydrogenase, synthesizes glutamate from ammonia and alpha-ketoglutarate; rate of alpha-ketoglutarate utilization differs from Gdh3	1	67.1095	9.64881e-07	81.884	No flanking Lys, ratio valid	0.146146	0.199819	0.533141	0.249702
1864	325	1990	YOR375C	GDH1	>YOR375C GDH1 SGDID:S000005902, Chr XV from 1043040-1041676, reverse complement, Verified ORF, NADP(+)-dependent glutamate dehydrogenase, synthesizes glutamate from ammonia and alpha-ketoglutarate; rate of alpha-ketoglutarate utilization differs from Gdh3	1	97.9042	1.17173e-06	227.44	Known Flanking GlyGly site, ratio meaningless
1865	70	1990	YOR375C	GDH1	>YOR375C GDH1 SGDID:S000005902, Chr XV from 1043040-1041676, reverse complement, Verified ORF, NADP(+)-dependent glutamate dehydrogenase, synthesizes glutamate from ammonia and alpha-ketoglutarate; rate of alpha-ketoglutarate utilization differs from Gdh3	1	128.727	1.21355e-08	375.65	Known Flanking GlyGly site, ratio meaningless
1866	53	1990	YOR375C	GDH1	>YOR375C GDH1 SGDID:S000005902, Chr XV from 1043040-1041676, reverse complement, Verified ORF, NADP(+)-dependent glutamate dehydrogenase, synthesizes glutamate from ammonia and alpha-ketoglutarate; rate of alpha-ketoglutarate utilization differs from Gdh3	1	380.652	7.46395e-09	412.54	No flanking Lys, ratio valid	0.195401	0.267079	0.694105	0.330875
74	75	91	YAL062W	GDH3	>YAL062W GDH3 SGDID:S000000058, Chr I from 31568-32941, Verified ORF, NADP(+)-dependent glutamate dehydrogenase, synthesizes glutamate from ammonia and alpha-ketoglutarate; rate of alpha-ketoglutarate utilization differs from Gdh1p; expression regulated b	1	154.011	0.00203591	154.01	No known flanking GlyGly site, ratio may be meaningful	0.26866	0.289084	0.38627	0.310723
75	32;31	91;1990	YAL062W;YOR375C	GDH3	>YAL062W GDH3 SGDID:S000000058, Chr I from 31568-32941, Verified ORF, NADP(+)-dependent glutamate dehydrogenase, synthesizes glutamate from ammonia and alpha-ketoglutarate; rate of alpha-ketoglutarate utilization differs from Gdh1p; expression regulated b	1	68.2235	0.00230205	91.318	No known flanking GlyGly site, ratio may be meaningful	0.229885	0.253473		0.241391
76	170;169	91;1990	YAL062W;YOR375C	GDH3	>YAL062W GDH3 SGDID:S000000058, Chr I from 31568-32941, Verified ORF, NADP(+)-dependent glutamate dehydrogenase, synthesizes glutamate from ammonia and alpha-ketoglutarate; rate of alpha-ketoglutarate utilization differs from Gdh1p; expression regulated b	1	158.471	0.000170392	204.27	No known flanking GlyGly site, ratio may be meaningful	0.321473			0.321473
676	67	672	YER136W	GDI1	>YER136W GDI1 SGDID:S000000938, Chr V from 439612-440967, Verified ORF, GDP dissociation inhibitor, regulates vesicle traffic in secretory pathways by regulating the dissociation of GDP from the Sec4/Ypt/rab family of GTP binding proteins	1	94.4023	0.0238689	94.402	No known flanking GlyGly site, ratio may be meaningful	1.07907			1.07907
677	443	672	YER136W	GDI1	>YER136W GDI1 SGDID:S000000938, Chr V from 439612-440967, Verified ORF, GDP dissociation inhibitor, regulates vesicle traffic in secretory pathways by regulating the dissociation of GDP from the Sec4/Ypt/rab family of GTP binding proteins	1	113.068	0.0151286	113.07	No flanking Lys, ratio valid	1.00877			1.00877
227	175	211	YBR187W	GDT1	>YBR187W GDT1 SGDID:S000000391, Chr II from 602629-603471, Uncharacterized ORF, Putative protein of unknown function; expression is reduced in a gcr1 null mutant; GFP-fusion protein localizes to the vacuole; expression pattern and physical interactions su	0.99999	50.1099	0.0107379	86.794	No known flanking GlyGly site, ratio may be meaningful
1193	712	1255	YKL104C	GFA1	>YKL104C GFA1 SGDID:S000001587, Chr XI from 245017-242864, reverse complement, Verified ORF, Glutamine-fructose-6-phosphate amidotransferase, catalyzes the formation of glucosamine-6-P and glutamate from fructose-6-P and glutamine in the first step of chi	1	111.455	0.000816039	111.46	No flanking Lys, ratio valid	0.645237			0.645237
525	14	511	YDR358W	GGA1	>YDR358W GGA1 SGDID:S000002766, Chr IV from 1190053-1191726, Verified ORF, Golgi-localized protein with homology to gamma-adaptin, interacts with and regulates Arf1p and Arf2p in a GTP-dependent manner in order to facilitate traffic through the late Golgi	1	78.1127	0.00474087	90.601	No flanking Lys, ratio valid	0.847449			0.847449
996	287	988	YHR108W	GGA2	>YHR108W GGA2 SGDID:S000001150, Chr VIII from 328306-330063, Verified ORF, Golgi-localized protein with homology to gamma-adaptin, interacts with and regulates Arf1p and Arf2p in a GTP-dependent manner in order to facilitate traffic through the late Golgi	1	152.594	4.99171e-05	152.59	No known flanking GlyGly site, ratio may be meaningful	4.296			4.296
997	18	988	YHR108W	GGA2	>YHR108W GGA2 SGDID:S000001150, Chr VIII from 328306-330063, Verified ORF, Golgi-localized protein with homology to gamma-adaptin, interacts with and regulates Arf1p and Arf2p in a GTP-dependent manner in order to facilitate traffic through the late Golgi	1	105.136	0.0083156	105.14	No flanking Lys, ratio valid
998	246	988	YHR108W	GGA2	>YHR108W GGA2 SGDID:S000001150, Chr VIII from 328306-330063, Verified ORF, Golgi-localized protein with homology to gamma-adaptin, interacts with and regulates Arf1p and Arf2p in a GTP-dependent manner in order to facilitate traffic through the late Golgi	1	134.811	0.000612507	134.81	No known flanking GlyGly site, ratio may be meaningful	1.02759			1.02759
582	480	561	YDR507C	GIN4	>YDR507C GIN4 SGDID:S000002915, Chr IV from 1465779-1462351, reverse complement, Verified ORF, Protein kinase involved in bud growth and assembly of the septin ring, proposed to have kinase-dependent and kinase-independent activities; undergoes autophosph	0.999998	57.8375	0.00028415	211.37	No known flanking GlyGly site, ratio may be meaningful		0.762292	0.988307	0.867974
1643	109	1768	YNL255C	GIS2	>YNL255C GIS2 SGDID:S000005199, Chr XIV from 167791-167330, reverse complement, Verified ORF, Protein with seven cysteine-rich CCHC zinc-finger motifs, similar to human CNBP, proposed to be involved in the RAS/cAMP signaling pathway	1	67.9304	0.0181628	67.93	No known flanking GlyGly site, ratio may be meaningful	0.715142			0.715142
1644	91	1768	YNL255C	GIS2	>YNL255C GIS2 SGDID:S000005199, Chr XIV from 167791-167330, reverse complement, Verified ORF, Protein with seven cysteine-rich CCHC zinc-finger motifs, similar to human CNBP, proposed to be involved in the RAS/cAMP signaling pathway	1	106.88	0.00444135	106.88	No known flanking GlyGly site, ratio may be meaningful	0.882112	0.804848	0.83888	0.841355
1645	30	1768	YNL255C	GIS2	>YNL255C GIS2 SGDID:S000005199, Chr XIV from 167791-167330, reverse complement, Verified ORF, Protein with seven cysteine-rich CCHC zinc-finger motifs, similar to human CNBP, proposed to be involved in the RAS/cAMP signaling pathway	1	41.5773	0.0422398	41.577	No flanking Lys, ratio valid	0.570204			0.570204
1646	4	1768	YNL255C	GIS2	>YNL255C GIS2 SGDID:S000005199, Chr XIV from 167791-167330, reverse complement, Verified ORF, Protein with seven cysteine-rich CCHC zinc-finger motifs, similar to human CNBP, proposed to be involved in the RAS/cAMP signaling pathway	1	64.2073	1.62474e-11	153.97	No known flanking GlyGly site, ratio may be meaningful	0.382404	0.453533	0.824515	0.522929	0.182333	0.0707748	0.113598
321	505	301	YCR098C	GIT1	>YCR098C GIT1 SGDID:S000000695, Chr III from 298602-297046, reverse complement, Verified ORF, Plasma membrane permease, mediates uptake of glycerophosphoinositol and glycerophosphocholine as sources of the nutrients inositol and phosphate; expression and	1	75.5657	0.0152237	75.566	No known flanking GlyGly site, ratio may be meaningful
675	22	670	YER133W	GLC7	>YER133W GLC7 SGDID:S000000935, Chr V from 432491-432667,433193-433954, Verified ORF, Catalytic subunit of type 1 serine/threonine protein phosphatase, involved in many processes including glycogen metabolism, sporulation, and mitosis; interacts with mult	1	369.507	2.19934e-08	369.51	No flanking Lys, ratio valid	0.104716		0.205423	0.146666
1562	105	1668	YMR311C	GLC8	>YMR311C GLC8 SGDID:S000004928, Chr XIII from 897602-896913, reverse complement, Verified ORF, Regulatory subunit of protein phosphatase 1 (Glc7p), involved in glycogen metabolism and chromosome segregation; proposed to regulate Glc7p activity via conform	1	74.255	4.62578e-07	154.01	No known flanking GlyGly site, ratio may be meaningful	1.788	0.687037	0.989024	1.06705	0.706076		0.706076
280	275	260	YCL040W	GLK1	>YCL040W GLK1 SGDID:S000000545, Chr III from 50838-52340, Verified ORF, Glucokinase, catalyzes the phosphorylation of glucose at C6 in the first irreversible step of glucose metabolism; one of three glucose phosphorylating enzymes; expression regulated by	1	73.0388	0.0561187	73.039	Known Flanking GlyGly site, ratio meaningless
281	278	260	YCL040W	GLK1	>YCL040W GLK1 SGDID:S000000545, Chr III from 50838-52340, Verified ORF, Glucokinase, catalyzes the phosphorylation of glucose at C6 in the first irreversible step of glucose metabolism; one of three glucose phosphorylating enzymes; expression regulated by	1	73.0388	0.0561187	73.039	Known Flanking GlyGly site, ratio meaningless
282	8	260	YCL040W	GLK1	>YCL040W GLK1 SGDID:S000000545, Chr III from 50838-52340, Verified ORF, Glucokinase, catalyzes the phosphorylation of glucose at C6 in the first irreversible step of glucose metabolism; one of three glucose phosphorylating enzymes; expression regulated by	1	77.1237	0.0117675	103.97	No flanking Lys, ratio valid	0.929445			0.929445
1961	8	2089	YPR035W	GLN1	>YPR035W GLN1 SGDID:S000006239, Chr XVI from 642205-643317, Verified ORF, Glutamine synthetase (GS), synthesizes glutamine from glutamate and ammonia; with Glt1p, forms the secondary pathway for glutamate biosynthesis from ammonia; expression regulated by	1	95.1834	1.14217e-27	202.61	No known flanking GlyGly site, ratio may be meaningful	0.734714	0.620097	0.951099	0.756719	0.454371		0.454371
1962	166	2089	YPR035W	GLN1	>YPR035W GLN1 SGDID:S000006239, Chr XVI from 642205-643317, Verified ORF, Glutamine synthetase (GS), synthesizes glutamine from glutamate and ammonia; with Glt1p, forms the secondary pathway for glutamate biosynthesis from ammonia; expression regulated by	1	151.699	8.84854e-05	190.63	No known flanking GlyGly site, ratio may be meaningful	0.363805			0.363805
1963	283	2089	YPR035W	GLN1	>YPR035W GLN1 SGDID:S000006239, Chr XVI from 642205-643317, Verified ORF, Glutamine synthetase (GS), synthesizes glutamine from glutamate and ammonia; with Glt1p, forms the secondary pathway for glutamate biosynthesis from ammonia; expression regulated by	1	349.812	2.70879e-27	365.28	No flanking Lys, ratio valid	0.345732	0.490655		0.411868
1964	324	2089	YPR035W	GLN1	>YPR035W GLN1 SGDID:S000006239, Chr XVI from 642205-643317, Verified ORF, Glutamine synthetase (GS), synthesizes glutamine from glutamate and ammonia; with Glt1p, forms the secondary pathway for glutamate biosynthesis from ammonia; expression regulated by	1	189.824	0.000204495	201.08	No flanking Lys, ratio valid	0.335796			0.335796
1965	273	2089	YPR035W	GLN1	>YPR035W GLN1 SGDID:S000006239, Chr XVI from 642205-643317, Verified ORF, Glutamine synthetase (GS), synthesizes glutamine from glutamate and ammonia; with Glt1p, forms the secondary pathway for glutamate biosynthesis from ammonia; expression regulated by	1	93.8391	0.000100391	213.63	No known flanking GlyGly site, ratio may be meaningful	0.286671	0.470709	0.580895	0.427968
669	386	664	YER122C	GLO3	>YER122C GLO3 SGDID:S000000924, Chr V from 404348-402867, reverse complement, Verified ORF, ADP-ribosylation factor GTPase activating protein (ARF GAP), involved in ER-Golgi transport; shares functional similarity with Gcs1p	1	154.011	0.0010241	154.01	No flanking Lys, ratio valid	1.70385			1.70385
391	1446	373	YDL171C	GLT1	>YDL171C GLT1 SGDID:S000002330, Chr IV from 155641-149204, reverse complement, Verified ORF, NAD(+)-dependent glutamate synthase (GOGAT), synthesizes glutamate from glutamine and alpha-ketoglutarate; with Gln1p, forms the secondary pathway for glutamate b	1	96.665	0.00259344	117.01	No flanking Lys, ratio valid	0.605237			0.605237
392	964	373	YDL171C	GLT1	>YDL171C GLT1 SGDID:S000002330, Chr IV from 155641-149204, reverse complement, Verified ORF, NAD(+)-dependent glutamate synthase (GOGAT), synthesizes glutamate from glutamine and alpha-ketoglutarate; with Gln1p, forms the secondary pathway for glutamate b	1	95.1834	0.0445955	95.183	No flanking Lys, ratio valid
607	383	592	YEL046C	GLY1	>YEL046C GLY1 SGDID:S000000772, Chr V from 68792-67629, reverse complement, Verified ORF, Threonine aldolase, catalyzes the cleavage of L-allo-threonine and L-threonine to glycine; involved in glycine biosynthesis	0.999448	32.5818	0.0719123	85.265	No known flanking GlyGly site, ratio may be meaningful	0.989736	1.88883	0.793805	1.14062
608	312	592	YEL046C	GLY1	>YEL046C GLY1 SGDID:S000000772, Chr V from 68792-67629, reverse complement, Verified ORF, Threonine aldolase, catalyzes the cleavage of L-allo-threonine and L-threonine to glycine; involved in glycine biosynthesis	1	80.6884	0.00625576	80.688	No known flanking GlyGly site, ratio may be meaningful	0.535746			0.535746
609	228	592	YEL046C	GLY1	>YEL046C GLY1 SGDID:S000000772, Chr V from 68792-67629, reverse complement, Verified ORF, Threonine aldolase, catalyzes the cleavage of L-allo-threonine and L-threonine to glycine; involved in glycine biosynthesis	1	96.1613	1.22033e-45	297.45	No known flanking GlyGly site, ratio may be meaningful	1.58211	1.65223	1.39514	1.53925	0.584923	1.03337	0.77746
610	9	592	YEL046C	GLY1	>YEL046C GLY1 SGDID:S000000772, Chr V from 68792-67629, reverse complement, Verified ORF, Threonine aldolase, catalyzes the cleavage of L-allo-threonine and L-threonine to glycine; involved in glycine biosynthesis	1	135.614	0.00152983	140.96	No flanking Lys, ratio valid	0.597813			0.597813
707	70	697	YFL017C	GNA1	>YFL017C GNA1 SGDID:S000001877, Chr VI from 104456-103977, reverse complement, Verified ORF, Evolutionarily conserved glucosamine-6-phosphate acetyltransferase required for multiple cell cycle events including passage through START, DNA synthesis, and mit	1	41.3826	5.33245e-05	149.57	No known flanking GlyGly site, ratio may be meaningful	1.09678	0.731366		0.895627
583	109	562	YDR508C	GNP1	>YDR508C GNP1 SGDID:S000002916, Chr IV from 1468437-1466446, reverse complement, Verified ORF, High-affinity glutamine permease, also transports Leu, Ser, Thr, Cys, Met and Asn; expression is fully dependent on Grr1p and modulated by the Ssy1p-Ptr3p-Ssy5p	1	47.3706	2.3642e-06	68.458	No flanking Lys, ratio valid
584	41	562	YDR508C	GNP1	>YDR508C GNP1 SGDID:S000002916, Chr IV from 1468437-1466446, reverse complement, Verified ORF, High-affinity glutamine permease, also transports Leu, Ser, Thr, Cys, Met and Asn; expression is fully dependent on Grr1p and modulated by the Ssy1p-Ptr3p-Ssy5p	1	129.036	3.50441e-09	336.71	Known Flanking GlyGly site, ratio meaningless
585	57	562	YDR508C	GNP1	>YDR508C GNP1 SGDID:S000002916, Chr IV from 1468437-1466446, reverse complement, Verified ORF, High-affinity glutamine permease, also transports Leu, Ser, Thr, Cys, Met and Asn; expression is fully dependent on Grr1p and modulated by the Ssy1p-Ptr3p-Ssy5p	1	148.784	7.87738e-05	159.77	Known Flanking GlyGly site, ratio meaningless
586	122	562	YDR508C	GNP1	>YDR508C GNP1 SGDID:S000002916, Chr IV from 1468437-1466446, reverse complement, Verified ORF, High-affinity glutamine permease, also transports Leu, Ser, Thr, Cys, Met and Asn; expression is fully dependent on Grr1p and modulated by the Ssy1p-Ptr3p-Ssy5p	1	207.949	7.71238e-08	207.95	No known flanking GlyGly site, ratio may be meaningful
587	34	562	YDR508C	GNP1	>YDR508C GNP1 SGDID:S000002916, Chr IV from 1468437-1466446, reverse complement, Verified ORF, High-affinity glutamine permease, also transports Leu, Ser, Thr, Cys, Met and Asn; expression is fully dependent on Grr1p and modulated by the Ssy1p-Ptr3p-Ssy5p	1	72.8223	4.4903e-05	170.42	No known flanking GlyGly site, ratio may be meaningful
961	165	942	YHR005C	GPA1	>YHR005C GPA1 SGDID:S000001047, Chr VIII from 114912-113494, reverse complement, Verified ORF, GTP-binding alpha subunit of the heterotrimeric G protein that couples to pheromone receptors; negatively regulates the mating pathway by sequestering G(beta)ga	1	190.035	0.00058509	192.91	No known flanking GlyGly site, ratio may be meaningful
626	52	612	YER020W	GPA2	>YER020W GPA2 SGDID:S000000822, Chr V from 195167-196516, Verified ORF, Nucleotide binding alpha subunit of the heterotrimeric G protein that interacts with the receptor Gpr1p, has signaling role in response to nutrients; green fluorescent protein (GFP)-f	1	128.857	0.00282586	128.86	No flanking Lys, ratio valid
1690	369	1827	YOL059W	GPD2	>YOL059W GPD2 SGDID:S000005420, Chr XV from 217126-218448, Verified ORF, NAD-dependent glycerol 3-phosphate dehydrogenase, homolog of Gpd1p, expression is controlled by an oxygen-independent signaling pathway required to regulate metabolism under anoxic c	1	78.7046	0.015623	94.538	No known flanking GlyGly site, ratio may be meaningful	0.701943	0.913373	0.727229	0.775426
1997	322	2129	YPR160W	GPH1	>YPR160W GPH1 SGDID:S000006364, Chr XVI from 861302-864010, Verified ORF, Non-essential glycogen phosphorylase required for the mobilization of glycogen, activity is regulated by cyclic AMP-mediated phosphorylation, expression is regulated by stress-respo	1	299.163	0.000242227	299.16	No known flanking GlyGly site, ratio may be meaningful	3.74406			3.74406
1206	71	1273	YKL152C	GPM1	>YKL152C GPM1 SGDID:S000001635, Chr XI from 164390-163647, reverse complement, Verified ORF, Tetrameric phosphoglycerate mutase, mediates the conversion of 3-phosphoglycerate to 2-phosphoglycerate during glycolysis and the reverse reaction during gluconeo	1	101.38	0.000111053	190.85	No flanking Lys, ratio valid	0.891901	0.772842	0.996846	0.882426		0.689439	0.689439
1207	175	1273	YKL152C	GPM1	>YKL152C GPM1 SGDID:S000001635, Chr XI from 164390-163647, reverse complement, Verified ORF, Tetrameric phosphoglycerate mutase, mediates the conversion of 3-phosphoglycerate to 2-phosphoglycerate during glycolysis and the reverse reaction during gluconeo	1	160.913	0.000598414	160.91	No known flanking GlyGly site, ratio may be meaningful	0.639524			0.639524
1208	109	1273	YKL152C	GPM1	>YKL152C GPM1 SGDID:S000001635, Chr XI from 164390-163647, reverse complement, Verified ORF, Tetrameric phosphoglycerate mutase, mediates the conversion of 3-phosphoglycerate to 2-phosphoglycerate during glycolysis and the reverse reaction during gluconeo	1	98.1563	0.000325849	224.75	No known flanking GlyGly site, ratio may be meaningful	1.22015	0.938481	0.902608	1.01107
1209	191	1273	YKL152C	GPM1	>YKL152C GPM1 SGDID:S000001635, Chr XI from 164390-163647, reverse complement, Verified ORF, Tetrameric phosphoglycerate mutase, mediates the conversion of 3-phosphoglycerate to 2-phosphoglycerate during glycolysis and the reverse reaction during gluconeo	1	189.516	0.00106771	189.52	No known flanking GlyGly site, ratio may be meaningful	0.413259	0.905068	0.540947	0.587065
1210	47	1273	YKL152C	GPM1	>YKL152C GPM1 SGDID:S000001635, Chr XI from 164390-163647, reverse complement, Verified ORF, Tetrameric phosphoglycerate mutase, mediates the conversion of 3-phosphoglycerate to 2-phosphoglycerate during glycolysis and the reverse reaction during gluconeo	1	105.204	0.00221539	105.2	Known Flanking GlyGly site, ratio meaningless
1211	57	1273	YKL152C	GPM1	>YKL152C GPM1 SGDID:S000001635, Chr XI from 164390-163647, reverse complement, Verified ORF, Tetrameric phosphoglycerate mutase, mediates the conversion of 3-phosphoglycerate to 2-phosphoglycerate during glycolysis and the reverse reaction during gluconeo	1	130.006	1.0666e-06	269.44	Known Flanking GlyGly site, ratio meaningless
1212	31	1273	YKL152C	GPM1	>YKL152C GPM1 SGDID:S000001635, Chr XI from 164390-163647, reverse complement, Verified ORF, Tetrameric phosphoglycerate mutase, mediates the conversion of 3-phosphoglycerate to 2-phosphoglycerate during glycolysis and the reverse reaction during gluconeo	1	98.6294	0.00184643	98.629	No known flanking GlyGly site, ratio may be meaningful						0.956424	0.956424
1213	3	1273	YKL152C	GPM1	>YKL152C GPM1 SGDID:S000001635, Chr XI from 164390-163647, reverse complement, Verified ORF, Tetrameric phosphoglycerate mutase, mediates the conversion of 3-phosphoglycerate to 2-phosphoglycerate during glycolysis and the reverse reaction during gluconeo	1	138.848	0.00866945	175.91	No flanking Lys, ratio valid	0.744253	0.933816	0.789372	0.818631		1.12435	1.12435
1214	133	1273	YKL152C	GPM1	>YKL152C GPM1 SGDID:S000001635, Chr XI from 164390-163647, reverse complement, Verified ORF, Tetrameric phosphoglycerate mutase, mediates the conversion of 3-phosphoglycerate to 2-phosphoglycerate during glycolysis and the reverse reaction during gluconeo	1	53.5358	0.0242318	53.536	No flanking Lys, ratio valid	1.23655			1.23655
332	368	316	YDL035C	GPR1	>YDL035C GPR1 SGDID:S000002193, Chr IV from 392055-389170, reverse complement, Verified ORF, Plasma membrane G protein coupled receptor (GPCR) that interacts with the heterotrimeric G protein alpha subunit, Gpa2p, and with Plc1p; sensor that integrates nu	1	236.081	4.01207e-05	248.19	No flanking Lys, ratio valid
333	392	316	YDL035C	GPR1	>YDL035C GPR1 SGDID:S000002193, Chr IV from 392055-389170, reverse complement, Verified ORF, Plasma membrane G protein coupled receptor (GPCR) that interacts with the heterotrimeric G protein alpha subunit, Gpa2p, and with Plc1p; sensor that integrates nu	1	179.673	4.90406e-07	179.67	No known flanking GlyGly site, ratio may be meaningful
1930	48	2057	YPL223C	GRE1	>YPL223C GRE1 SGDID:S000006144, Chr XVI from 129137-128631, reverse complement, Verified ORF, Hydrophilin of unknown function; stress induced (osmotic, ionic, oxidative, heat shock and heavy metals); regulated by the HOG pathway	1	131.858	6.34432e-07	249.86	No flanking Lys, ratio valid
193	7	185	YBR121C	GRS1	>YBR121C GRS1 SGDID:S000000325, Chr II from 483361-481358, reverse complement, Verified ORF, Cytoplasmic and mitochondrial glycyl-tRNA synthase that ligates glycine to the cognate anticodon bearing tRNA; transcription termination factor that may interact	1	72.0207	0.0388368	72.021	No known flanking GlyGly site, ratio may be meaningful
590	139	564	YDR513W	GRX2	>YDR513W GRX2 SGDID:S000002921, Chr IV from 1471010-1471441, Verified ORF, Cytoplasmic glutaredoxin, thioltransferase, glutathione-dependent disulfide oxidoreductase involved in maintaining redox state of target proteins, also exhibits glutathione peroxid	1	76.3317	0.00120165	100.88	Known Flanking GlyGly site, ratio meaningless
591	133	564	YDR513W	GRX2	>YDR513W GRX2 SGDID:S000002921, Chr IV from 1471010-1471441, Verified ORF, Cytoplasmic glutaredoxin, thioltransferase, glutathione-dependent disulfide oxidoreductase involved in maintaining redox state of target proteins, also exhibits glutathione peroxid	1	97.7714	0.00043802	196.84	Known Flanking GlyGly site, ratio meaningless
592	117	564	YDR513W	GRX2	>YDR513W GRX2 SGDID:S000002921, Chr IV from 1471010-1471441, Verified ORF, Cytoplasmic glutaredoxin, thioltransferase, glutathione-dependent disulfide oxidoreductase involved in maintaining redox state of target proteins, also exhibits glutathione peroxid	0.999994	52.2203	0.0099539	65.374	No known flanking GlyGly site, ratio may be meaningful
466	203	435	YDR098C	GRX3	>YDR098C GRX3 SGDID:S000002505, Chr IV from 645033-644176, reverse complement, Verified ORF, Hydroperoxide and superoxide-radical responsive glutathione-dependent oxidoreductase; monothiol glutaredoxin subfamily member along with Grx4p and Grx5p; protects	1	79.6897	0.000328307	85.937	No known flanking GlyGly site, ratio may be meaningful	0.455953			0.455953
469	687	439	YDR108W	GSG1	>YDR108W GSG1 SGDID:S000002515, Chr IV from 671267-673363, Verified ORF, Subunit of TRAPP (transport protein particle), a multi-subunit complex involved in targeting and/or fusion of ER-to-Golgi transport vesicles with their acceptor compartment; protein	1	71.0303	0.000161151	222.88	No flanking Lys, ratio valid
1359	39;40	1434;1927	YLR293C;YOR185C	GSP1	>YLR293C GSP1 SGDID:S000004284, Chr XII from 721432-720773, reverse complement, Verified ORF, GTP binding protein (mammalian Ranp homolog) involved in the maintenance of nuclear organization, RNA processing and transport; regulated by Prp20p, Rna1p, Yrb1p	1	85.1608	0.01365	85.161	No known flanking GlyGly site, ratio may be meaningful
883	334	872	YGR163W	GTR2	>YGR163W GTR2 SGDID:S000003395, Chr VII from 827557-828582, Verified ORF, Putative GTP binding protein that negatively regulates Ran/Tc4 GTPase cycle; activates transcription; subunit of EGO and GSE complexes; required for sorting of Gap1p; localizes to c	1	78.5288	0.000276278	109.15	No flanking Lys, ratio valid
884	255	872	YGR163W	GTR2	>YGR163W GTR2 SGDID:S000003395, Chr VII from 827557-828582, Verified ORF, Putative GTP binding protein that negatively regulates Ran/Tc4 GTPase cycle; activates transcription; subunit of EGO and GSE complexes; required for sorting of Gap1p; localizes to c	0.995554	23.5011	0.0119798	80.706	No known flanking GlyGly site, ratio may be meaningful
794	233	795	YGL181W	GTS1	>YGL181W GTS1 SGDID:S000003149, Chr VII from 157912-159102, Verified ORF, Protein that localizes to the nucleus and is involved in transcription regulation; also localizes to actin patches and plays a role in endocytosis; N-terminus contains an ARF-GAP do	1	89.6631	0.000452222	241.35	No flanking Lys, ratio valid
1062	224	1088	YIR038C	GTT1	>YIR038C GTT1 SGDID:S000001477, Chr IX from 424510-423806, reverse complement, Verified ORF, ER associated glutathione S-transferase capable of homodimerization; expression induced during the diauxic shift and throughout stationary phase; functional overl	1	250.054	2.17346e-06	277.06	No known flanking GlyGly site, ratio may be meaningful
805	233	817	YGL245W	GUS1	>YGL245W GUS1 SGDID:S000003214, Chr VII from 39023-41149, Verified ORF, Glutamyl-tRNA synthetase (GluRS), forms a complex with methionyl-tRNA synthetase (Mes1p) and Arc1p; complex formation increases the catalytic efficiency of both tRNA synthetases and e	1	120.452	0.000707774	120.45	No known flanking GlyGly site, ratio may be meaningful	1.19063			1.19063
1031	12	1037	YIL041W	GVP36	>YIL041W GVP36 SGDID:S000001303, Chr IX from 276524-277504, Verified ORF, BAR domain-containing protein that localizes to both early and late Golgi vesicles; required for adaptation to varying nutrient concentrations, fluid-phase endocytosis, polarization	1	86.6702	4.534e-19	110.41	No known flanking GlyGly site, ratio may be meaningful	1.23318	1.19608	1.21908	1.21602	2.82479	1.23391	1.86696
1555	7	1655	YMR290C	HAS1	>YMR290C HAS1 SGDID:S000004903, Chr XIII from 851590-850073, reverse complement, Verified ORF, ATP-dependent RNA helicase; localizes to both the nuclear periphery and nucleolus; highly enriched in nuclear pore complex fractions; constituent of 66S pre-rib	1	44.5311	0.0781978	44.531	No flanking Lys, ratio valid
1867	334	1992	YPL001W	HAT1	>YPL001W HAT1 SGDID:S000005922, Chr XVI from 554602-555726, Verified ORF, Catalytic subunit of the Hat1p-Hat2p histone acetyltransferase complex that uses the cofactor acetyl coenzyme A, to acetylate free nuclear and cytoplasmic histone H4; involved in te	0.999969	45.0245	0.000954596	76.492	No known flanking GlyGly site, ratio may be meaningful
411	112	396	YDL223C	HBT1	>YDL223C HBT1 SGDID:S000002382, Chr IV from 60406-57266, reverse complement, Verified ORF, Substrate of the Hub1p ubiquitin-like protein that localizes to the shmoo tip (mating projection); mutants are defective for mating projection formation, thereby im	1	47.0886	0.0119325	47.089	No known flanking GlyGly site, ratio may be meaningful	1.3194			1.3194
412	664	396	YDL223C	HBT1	>YDL223C HBT1 SGDID:S000002382, Chr IV from 60406-57266, reverse complement, Verified ORF, Substrate of the Hub1p ubiquitin-like protein that localizes to the shmoo tip (mating projection); mutants are defective for mating projection formation, thereby im	1	70.9084	0.0200502	70.908	No known flanking GlyGly site, ratio may be meaningful	1.60619			1.60619
1656	145	1774	YNL281W	HCH1	>YNL281W HCH1 SGDID:S000005225, Chr XIV from 108467-108928, Verified ORF, Heat shock protein regulator that binds to Hsp90p and may stimulate ATPase activity; originally identified as a high-copy number suppressor of a HSP90 loss-of-function mutation; GFP	1	100.809	0.0009628	237.41	No known flanking GlyGly site, ratio may be meaningful	0.776395	0.616468	0.86874	0.746382
1567	204	1680	YNL014W	HEF3	>YNL014W HEF3 SGDID:S000004959, Chr XIV from 606320-609454, Verified ORF, Translational elongation factor EF-3; paralog of YEF3 and member of the ABC superfamily; stimulates EF-1 alpha-dependent binding of aminoacyl-tRNA by the ribosome; normally expresse	1	183.722	0.000261357	229.56	No known flanking GlyGly site, ratio may be meaningful	0.877396	1.7091	0.703082	1.01779
1475	225	1585	YMR110C	HFD1	>YMR110C HFD1 SGDID:S000004716, Chr XIII from 491991-490393, reverse complement, Verified ORF, Putative fatty aldehyde dehydrogenase, located in the mitochondrial outer membrane and also in lipid particles; has similarity to human fatty aldehyde dehydroge	1	84.7431	0.00651527	84.743	No known flanking GlyGly site, ratio may be meaningful	1.33429			1.33429
1904	248	2028	YPL127C	HHO1	>YPL127C HHO1 SGDID:S000006048, Chr XVI from 309603-308827, reverse complement, Verified ORF, Histone H1, a linker histone required for nucleosome packaging at restricted sites; suppresses DNA repair involving homologous recombination; not required for te	0.997378	25.8014	0.0443835	71.692	No known flanking GlyGly site, ratio may be meaningful	0.698963			0.698963
135	80	143	YNL031C	HHT2	>YNL031C HHT2 SGDID:S000004976, Chr XIV from 576051-575641, reverse complement, Verified ORF, One of two identical histone H3 proteins (see also HHT1); core histone required for chromatin assembly, involved in heterochromatin-mediated telomeric and HM sil	1	162.925	0.00058926	162.93	No flanking Lys, ratio valid	0.566507	0.419791	0.601496	0.522986
136	57	143	YNL031C	HHT2	>YNL031C HHT2 SGDID:S000004976, Chr XIV from 576051-575641, reverse complement, Verified ORF, One of two identical histone H3 proteins (see also HHT1); core histone required for chromatin assembly, involved in heterochromatin-mediated telomeric and HM sil	1	92.4704	0.00264914	92.47	No flanking Lys, ratio valid	0.915033			0.915033
897	52	885	YGR191W	HIP1	>YGR191W HIP1 SGDID:S000003423, Chr VII from 880425-882236, Verified ORF, High-affinity histidine permease, also involved in the transport of manganese ions	1	69.2885	1.22759e-06	173.34	No known flanking GlyGly site, ratio may be meaningful		0.97439	1.18548	1.07476
632	272	628	YER055C	HIS1	>YER055C HIS1 SGDID:S000000857, Chr V from 265784-264891, reverse complement, Verified ORF, ATP phosphoribosyltransferase, a hexameric enzyme, catalyzes the first step in histidine biosynthesis; mutations cause histidine auxotrophy and sensitivity to Cu,	1	72.433	0.0202584	82.279	No known flanking GlyGly site, ratio may be meaningful	1.04194		0.961709	1.00102
1486	77	1602	YMR161W	HLJ1	>YMR161W HLJ1 SGDID:S000004771, Chr XIII from 577717-578391, Verified ORF, Co-chaperone for Hsp40p, anchored in the ER membrane; with its homolog Hdj1p promotes ER-associated protein degradation (ERAD) of integral membrane substrates; similar to E. coli D	1	148.129	0.0009575	148.13	No flanking Lys, ratio valid
1487	63	1602	YMR161W	HLJ1	>YMR161W HLJ1 SGDID:S000004771, Chr XIII from 577717-578391, Verified ORF, Co-chaperone for Hsp40p, anchored in the ER membrane; with its homolog Hdj1p promotes ER-associated protein degradation (ERAD) of integral membrane substrates; similar to E. coli D	1	122.326	0.000668598	176.44	No known flanking GlyGly site, ratio may be meaningful
635	102	631	YER057C	HMF1	>YER057C HMF1 SGDID:S000000859, Chr V from 271124-270735, reverse complement, Verified ORF, Member of the p14.5 protein family with similarity to Mmf1p, functionally complements Mmf1p function when targeted to mitochondria; heat shock inducible; high-dosa	1	72.8792	0.00248953	149.33	No known flanking GlyGly site, ratio may be meaningful	1.34185	1.39762	1.04836	1.25276
152	3	153	YBR034C	HMT1	>YBR034C HMT1 SGDID:S000000238, Chr II from 305976-304930, reverse complement, Verified ORF, Nuclear SAM-dependent mono- and asymmetric arginine dimethylating methyltransferase that modifies hnRNPs, including Npl3p and Hrp1p, thus facilitating nuclear exp	0.99986	38.5505	0.00243809	84.352	No known flanking GlyGly site, ratio may be meaningful		0.596558		0.596558
1327	185	1404	YLR205C	HMX1	>YLR205C HMX1 SGDID:S000004195, Chr XII from 553679-552726, reverse complement, Verified ORF, ER localized, heme-binding peroxidase involved in the degradation of heme; does not exhibit heme oxygenase activity despite similarity to heme oxygenases; expres	1	151.441	0.000375821	151.44	No known flanking GlyGly site, ratio may be meaningful
775	35	767	YGL077C	HNM1	>YGL077C HNM1 SGDID:S000003045, Chr VII from 363919-362228, reverse complement, Verified ORF, Choline/ethanolamine transporter; involved in the uptake of nitrogen mustard and the uptake of glycine betaine during hypersaline stress; co-regulated with phosp	1	347.515	1.76522e-06	347.51	No known flanking GlyGly site, ratio may be meaningful
776	562	767	YGL077C	HNM1	>YGL077C HNM1 SGDID:S000003045, Chr VII from 363919-362228, reverse complement, Verified ORF, Choline/ethanolamine transporter; involved in the uptake of nitrogen mustard and the uptake of glycine betaine during hypersaline stress; co-regulated with phosp	1	174.256	0.000170963	174.26	No known flanking GlyGly site, ratio may be meaningful
777	25	767	YGL077C	HNM1	>YGL077C HNM1 SGDID:S000003045, Chr VII from 363919-362228, reverse complement, Verified ORF, Choline/ethanolamine transporter; involved in the uptake of nitrogen mustard and the uptake of glycine betaine during hypersaline stress; co-regulated with phosp	1	104.972	6.53304e-10	341.1	No flanking Lys, ratio valid
1672	285	1804	YNR055C	HOL1	>YNR055C HOL1 SGDID:S000005338, Chr XIV from 730187-728427, reverse complement, Verified ORF, Putative transporter in the major facilitator superfamily (DHA1 family) of multidrug resistance transporters; mutations in membrane-spanning domains permit catio	1	195.712	1.49904e-06	300.71	No known flanking GlyGly site, ratio may be meaningful
1154	69	1212	YJR139C	HOM6	>YJR139C HOM6 SGDID:S000003900, Chr X from 690515-689436, reverse complement, Verified ORF, Homoserine dehydrogenase (L-homoserine:NADP oxidoreductase), dimeric enzyme that catalyzes the third step in the common pathway for methionine and threonine biosyn	1	98.3372	0.000125859	98.337	No known flanking GlyGly site, ratio may be meaningful	1.1863			1.1863
1155	290	1212	YJR139C	HOM6	>YJR139C HOM6 SGDID:S000003900, Chr X from 690515-689436, reverse complement, Verified ORF, Homoserine dehydrogenase (L-homoserine:NADP oxidoreductase), dimeric enzyme that catalyzes the third step in the common pathway for methionine and threonine biosyn	1	114.895	1.8003e-05	180.09	No known flanking GlyGly site, ratio may be meaningful	1.03787	1.09847	1.00417	1.04611		1.03691	1.03691
1156	117	1212	YJR139C	HOM6	>YJR139C HOM6 SGDID:S000003900, Chr X from 690515-689436, reverse complement, Verified ORF, Homoserine dehydrogenase (L-homoserine:NADP oxidoreductase), dimeric enzyme that catalyzes the third step in the common pathway for methionine and threonine biosyn	1	166.089	0.000153426	176.99	Known Flanking GlyGly site, ratio meaningless
1157	118	1212	YJR139C	HOM6	>YJR139C HOM6 SGDID:S000003900, Chr X from 690515-689436, reverse complement, Verified ORF, Homoserine dehydrogenase (L-homoserine:NADP oxidoreductase), dimeric enzyme that catalyzes the third step in the common pathway for methionine and threonine biosyn	1	122.176	0.000153426	122.18	Known Flanking GlyGly site, ratio meaningless
1158	324	1212	YJR139C	HOM6	>YJR139C HOM6 SGDID:S000003900, Chr X from 690515-689436, reverse complement, Verified ORF, Homoserine dehydrogenase (L-homoserine:NADP oxidoreductase), dimeric enzyme that catalyzes the third step in the common pathway for methionine and threonine biosyn	1	142.117	0.000189766	142.12	No known flanking GlyGly site, ratio may be meaningful	0.738749	0.611389		0.672059
1159	203	1212	YJR139C	HOM6	>YJR139C HOM6 SGDID:S000003900, Chr X from 690515-689436, reverse complement, Verified ORF, Homoserine dehydrogenase (L-homoserine:NADP oxidoreductase), dimeric enzyme that catalyzes the third step in the common pathway for methionine and threonine biosyn	1	127.559	0.000599506	233.46	No known flanking GlyGly site, ratio may be meaningful	0.884283	1.03661	0.947361	0.954056
1160	223	1212	YJR139C	HOM6	>YJR139C HOM6 SGDID:S000003900, Chr X from 690515-689436, reverse complement, Verified ORF, Homoserine dehydrogenase (L-homoserine:NADP oxidoreductase), dimeric enzyme that catalyzes the third step in the common pathway for methionine and threonine biosyn	1	80.6884	0.0652947	80.688	No flanking Lys, ratio valid		0.624622	1.00729	0.793205
638	155;155	633;1041	YER062C;YIL053W	HOR2	>YER062C HOR2 SGDID:S000000864, Chr V from 280680-279928, reverse complement, Verified ORF, One of two redundant DL-glycerol-3-phosphatases (RHR2/GPP1 encodes the other) involved in glycerol biosynthesis; induced in response to hyperosmotic stress and oxi	0.98465	18.0718	0.0605406	67.415	No known flanking GlyGly site, ratio may be meaningful	1.06028	0.772047		0.904756
551	137	530	YDR399W	HPT1	>YDR399W HPT1 SGDID:S000002807, Chr IV from 1270061-1270726, Verified ORF, Dimeric hypoxanthine-guanine phosphoribosyltransferase, catalyzes the formation of both inosine monophosphate and guanosine monophosphate; mutations in the human homolog HPRT1 can	0.867817	8.17252	0.00388082	92.906	Known Flanking GlyGly site, ratio meaningless
552	143	530	YDR399W	HPT1	>YDR399W HPT1 SGDID:S000002807, Chr IV from 1270061-1270726, Verified ORF, Dimeric hypoxanthine-guanine phosphoribosyltransferase, catalyzes the formation of both inosine monophosphate and guanosine monophosphate; mutations in the human homolog HPRT1 can	1	91.9612	0.00669662	91.961	Known Flanking GlyGly site, ratio meaningless
553	220	530	YDR399W	HPT1	>YDR399W HPT1 SGDID:S000002807, Chr IV from 1270061-1270726, Verified ORF, Dimeric hypoxanthine-guanine phosphoribosyltransferase, catalyzes the formation of both inosine monophosphate and guanosine monophosphate; mutations in the human homolog HPRT1 can	1	220.246	0.000409899	220.25	No flanking Lys, ratio valid	0.9527	0.740761	0.69471	0.78852
1831	256	1958	YOR267C	HRK1	>YOR267C HRK1 SGDID:S000005793, Chr XV from 824866-822587, reverse complement, Verified ORF, Protein kinase implicated in activation of the plasma membrane H(+)-ATPase Pma1p in response to glucose metabolism; plays a role in ion homeostasis	0.999999	59.544	0.0202584	114.86	No known flanking GlyGly site, ratio may be meaningful	1.11949			1.11949
1509	437;441	1611;2067	YMR186W;YPL240C	HSC82	>YMR186W HSC82 SGDID:S000004798, Chr XIII from 632354-634471, Verified ORF, Cytoplasmic chaperone of the Hsp90 family, redundant in function and nearly identical with Hsp82p, and together they are essential; expressed constitutively at 10-fold higher basa	1	109.79	0.0122884	109.79	No flanking Lys, ratio valid	1.13448			1.13448
1510	321;325	1611;2067	YMR186W;YPL240C	HSC82	>YMR186W HSC82 SGDID:S000004798, Chr XIII from 632354-634471, Verified ORF, Cytoplasmic chaperone of the Hsp90 family, redundant in function and nearly identical with Hsp82p, and together they are essential; expressed constitutively at 10-fold higher basa	1	51.0043	0.0350616	51.004	No flanking Lys, ratio valid	0.883159			0.883159
1511	606;610	1611;2067	YMR186W;YPL240C	HSC82	>YMR186W HSC82 SGDID:S000004798, Chr XIII from 632354-634471, Verified ORF, Cytoplasmic chaperone of the Hsp90 family, redundant in function and nearly identical with Hsp82p, and together they are essential; expressed constitutively at 10-fold higher basa	1	124.08	4.32004e-10	206.36	No known flanking GlyGly site, ratio may be meaningful	1.02773	0.98917	1.02949	1.01529
1512	480;484	1611;2067	YMR186W;YPL240C	HSC82	>YMR186W HSC82 SGDID:S000004798, Chr XIII from 632354-634471, Verified ORF, Cytoplasmic chaperone of the Hsp90 family, redundant in function and nearly identical with Hsp82p, and together they are essential; expressed constitutively at 10-fold higher basa	1	153.341	0.000261357	153.34	No known flanking GlyGly site, ratio may be meaningful	1.17537			1.17537
1513	541;545	1611;2067	YMR186W;YPL240C	HSC82	>YMR186W HSC82 SGDID:S000004798, Chr XIII from 632354-634471, Verified ORF, Cytoplasmic chaperone of the Hsp90 family, redundant in function and nearly identical with Hsp82p, and together they are essential; expressed constitutively at 10-fold higher basa	0.999982	47.3428	0.00513309	97.431	No known flanking GlyGly site, ratio may be meaningful	0.887192			0.887192
1514	383;387	1611;2067	YMR186W;YPL240C	HSC82	>YMR186W HSC82 SGDID:S000004798, Chr XIII from 632354-634471, Verified ORF, Cytoplasmic chaperone of the Hsp90 family, redundant in function and nearly identical with Hsp82p, and together they are essential; expressed constitutively at 10-fold higher basa	1	177.778	0.000198721	177.78	No known flanking GlyGly site, ratio may be meaningful	0.930733			0.930733
1515	590;594	1611;2067	YMR186W;YPL240C	HSC82	>YMR186W HSC82 SGDID:S000004798, Chr XIII from 632354-634471, Verified ORF, Cytoplasmic chaperone of the Hsp90 family, redundant in function and nearly identical with Hsp82p, and together they are essential; expressed constitutively at 10-fold higher basa	1	101.327	0.00203591	106.68	No flanking Lys, ratio valid	1.04864	1.11851	0.691291	0.932487		1.05586	1.05586
1516	188;188	1611;2067	YMR186W;YPL240C	HSC82	>YMR186W HSC82 SGDID:S000004798, Chr XIII from 632354-634471, Verified ORF, Cytoplasmic chaperone of the Hsp90 family, redundant in function and nearly identical with Hsp82p, and together they are essential; expressed constitutively at 10-fold higher basa	0.999903	40.1447	0.0127548	70.334	No known flanking GlyGly site, ratio may be meaningful	0.867554			0.867554
1517	566;570	1611;2067	YMR186W;YPL240C	HSC82	>YMR186W HSC82 SGDID:S000004798, Chr XIII from 632354-634471, Verified ORF, Cytoplasmic chaperone of the Hsp90 family, redundant in function and nearly identical with Hsp82p, and together they are essential; expressed constitutively at 10-fold higher basa	1	174.94	0.000821597	178.71	No known flanking GlyGly site, ratio may be meaningful	1.03397			1.03397
1518	445;449	1611;2067	YMR186W;YPL240C	HSC82	>YMR186W HSC82 SGDID:S000004798, Chr XIII from 632354-634471, Verified ORF, Cytoplasmic chaperone of the Hsp90 family, redundant in function and nearly identical with Hsp82p, and together they are essential; expressed constitutively at 10-fold higher basa	1	70.5404	0.00258453	70.54	No flanking Lys, ratio valid	0.927519			0.927519
1519	54	1611	YMR186W	HSC82	>YMR186W HSC82 SGDID:S000004798, Chr XIII from 632354-634471, Verified ORF, Cytoplasmic chaperone of the Hsp90 family, redundant in function and nearly identical with Hsp82p, and together they are essential; expressed constitutively at 10-fold higher basa	1	103.708	0.03215	103.71	No flanking Lys, ratio valid	0.785543			0.785543
944	7	926	YHL002W	HSE1	>YHL002W HSE1 SGDID:S000000994, Chr VIII from 102607-103965, Verified ORF, Subunit of the endosomal Vps27p-Hse1p complex required for sorting of ubiquitinated membrane proteins into intralumenal vesicles prior to vacuolar degradation, as well as for recyc	1	73.0388	0.00165845	90.709	No flanking Lys, ratio valid
1745	38	1867	YOR020C	HSP10	>YOR020C HSP10 SGDID:S000005546, Chr XV from 370844-370524, reverse complement, Verified ORF, Mitochondrial matrix co-chaperonin that inhibits the ATPase activity of Hsp60p, a mitochondrial chaperonin; involved in protein folding and sorting in the mitoch	1	106.88	0.000358986	186.29	No known flanking GlyGly site, ratio may be meaningful	1.38189	1.04313	1.1659	1.18893
1254	410	1336	YLL026W	HSP104	>YLL026W HSP104 SGDID:S000003949, Chr XII from 88622-91348, Verified ORF, Heat shock protein that cooperates with Ydj1p (Hsp40) and Ssa1p (Hsp70) to refold and reactivate previously denatured, aggregated proteins; responsive to stresses including: heat, e	1	73.4809	0.0246867	122.55	Known Flanking GlyGly site, ratio meaningless
1255	417	1336	YLL026W	HSP104	>YLL026W HSP104 SGDID:S000003949, Chr XII from 88622-91348, Verified ORF, Heat shock protein that cooperates with Ydj1p (Hsp40) and Ssa1p (Hsp70) to refold and reactivate previously denatured, aggregated proteins; responsive to stresses including: heat, e	1	100.716	0.00218666	160.11	Known Flanking GlyGly site, ratio meaningless
1256	649	1336	YLL026W	HSP104	>YLL026W HSP104 SGDID:S000003949, Chr XII from 88622-91348, Verified ORF, Heat shock protein that cooperates with Ydj1p (Hsp40) and Ssa1p (Hsp70) to refold and reactivate previously denatured, aggregated proteins; responsive to stresses including: heat, e	1	228.606	1.0891e-05	286.74	No known flanking GlyGly site, ratio may be meaningful	0.691132	0.942707	0.889118	0.833616		3.64877	3.64877
1257	258	1336	YLL026W	HSP104	>YLL026W HSP104 SGDID:S000003949, Chr XII from 88622-91348, Verified ORF, Heat shock protein that cooperates with Ydj1p (Hsp40) and Ssa1p (Hsp70) to refold and reactivate previously denatured, aggregated proteins; responsive to stresses including: heat, e	1	166.187	0.000592934	166.19	No known flanking GlyGly site, ratio may be meaningful	0.916578			0.916578
1258	470	1336	YLL026W	HSP104	>YLL026W HSP104 SGDID:S000003949, Chr XII from 88622-91348, Verified ORF, Heat shock protein that cooperates with Ydj1p (Hsp40) and Ssa1p (Hsp70) to refold and reactivate previously denatured, aggregated proteins; responsive to stresses including: heat, e	1	158.06	1.56346e-05	182.57	No known flanking GlyGly site, ratio may be meaningful	0.770504	1.06423	1.40286	1.04779
694	18	695	YFL014W	HSP12	>YFL014W HSP12 SGDID:S000001880, Chr VI from 107250-107579, Verified ORF, Plasma membrane localized protein that protects membranes from desiccation; induced by heat shock, oxidative stress, osmostress, stationary phase entry, glucose depletion, oleate an	1	103.213	1.94087e-18	263.07	Known Flanking GlyGly site, ratio meaningless
695	23	695	YFL014W	HSP12	>YFL014W HSP12 SGDID:S000001880, Chr VI from 107250-107579, Verified ORF, Plasma membrane localized protein that protects membranes from desiccation; induced by heat shock, oxidative stress, osmostress, stationary phase entry, glucose depletion, oleate an	1	86.0227	3.01715e-08	259.08	Known Flanking GlyGly site, ratio meaningless
696	30	695	YFL014W	HSP12	>YFL014W HSP12 SGDID:S000001880, Chr VI from 107250-107579, Verified ORF, Plasma membrane localized protein that protects membranes from desiccation; induced by heat shock, oxidative stress, osmostress, stationary phase entry, glucose depletion, oleate an	1	91.8048	2.53898e-05	320.01	Known Flanking GlyGly site, ratio meaningless
697	86	695	YFL014W	HSP12	>YFL014W HSP12 SGDID:S000001880, Chr VI from 107250-107579, Verified ORF, Plasma membrane localized protein that protects membranes from desiccation; induced by heat shock, oxidative stress, osmostress, stationary phase entry, glucose depletion, oleate an	1	119.566	0.00039688	140.83	Known Flanking GlyGly site, ratio meaningless
698	88	695	YFL014W	HSP12	>YFL014W HSP12 SGDID:S000001880, Chr VI from 107250-107579, Verified ORF, Plasma membrane localized protein that protects membranes from desiccation; induced by heat shock, oxidative stress, osmostress, stationary phase entry, glucose depletion, oleate an	1	185.947	7.33559e-27	234.04	Known Flanking GlyGly site, ratio meaningless
699	36	695	YFL014W	HSP12	>YFL014W HSP12 SGDID:S000001880, Chr VI from 107250-107579, Verified ORF, Plasma membrane localized protein that protects membranes from desiccation; induced by heat shock, oxidative stress, osmostress, stationary phase entry, glucose depletion, oleate an	1	163.564	5.39614e-14	282.09	Known Flanking GlyGly site, ratio meaningless
700	39	695	YFL014W	HSP12	>YFL014W HSP12 SGDID:S000001880, Chr VI from 107250-107579, Verified ORF, Plasma membrane localized protein that protects membranes from desiccation; induced by heat shock, oxidative stress, osmostress, stationary phase entry, glucose depletion, oleate an	0.991091	20.4629	0.00232676	83.647	Known Flanking GlyGly site, ratio meaningless
701	12	695	YFL014W	HSP12	>YFL014W HSP12 SGDID:S000001880, Chr VI from 107250-107579, Verified ORF, Plasma membrane localized protein that protects membranes from desiccation; induced by heat shock, oxidative stress, osmostress, stationary phase entry, glucose depletion, oleate an	1	79.2166	1.44835e-14	262.24	Known Flanking GlyGly site, ratio meaningless
702	64	695	YFL014W	HSP12	>YFL014W HSP12 SGDID:S000001880, Chr VI from 107250-107579, Verified ORF, Plasma membrane localized protein that protects membranes from desiccation; induced by heat shock, oxidative stress, osmostress, stationary phase entry, glucose depletion, oleate an	1	126.799	1.39212e-13	418.8	Known Flanking GlyGly site, ratio meaningless
703	62	695	YFL014W	HSP12	>YFL014W HSP12 SGDID:S000001880, Chr VI from 107250-107579, Verified ORF, Plasma membrane localized protein that protects membranes from desiccation; induced by heat shock, oxidative stress, osmostress, stationary phase entry, glucose depletion, oleate an	0.999272	31.3759	1.19549e-06	143.88	Known Flanking GlyGly site, ratio meaningless
704	7	695	YFL014W	HSP12	>YFL014W HSP12 SGDID:S000001880, Chr VI from 107250-107579, Verified ORF, Plasma membrane localized protein that protects membranes from desiccation; induced by heat shock, oxidative stress, osmostress, stationary phase entry, glucose depletion, oleate an	1	152.693	9.55512e-13	191.63	Known Flanking GlyGly site, ratio meaningless
705	108	695	YFL014W	HSP12	>YFL014W HSP12 SGDID:S000001880, Chr VI from 107250-107579, Verified ORF, Plasma membrane localized protein that protects membranes from desiccation; induced by heat shock, oxidative stress, osmostress, stationary phase entry, glucose depletion, oleate an	1	80.7549	0.000601978	202.31	No known flanking GlyGly site, ratio may be meaningful	0.686339	0.854082	0.984283	0.832503		1.10228	1.10228
706	50	695	YFL014W	HSP12	>YFL014W HSP12 SGDID:S000001880, Chr VI from 107250-107579, Verified ORF, Plasma membrane localized protein that protects membranes from desiccation; induced by heat shock, oxidative stress, osmostress, stationary phase entry, glucose depletion, oleate an	1	144.103	1.60047e-12	364.14	Known Flanking GlyGly site, ratio meaningless
491	295	461	YDR171W	HSP42	>YDR171W HSP42 SGDID:S000002578, Chr IV from 806619-807746, Verified ORF, Small heat shock protein (sHSP) with chaperone activity; forms barrel-shaped oligomers that suppress unfolded protein aggregation; involved in cytoskeleton reorganization after heat	1	127.514	3.34377e-08	219.72	No known flanking GlyGly site, ratio may be meaningful	1.82468	1.46327	1.96552	1.73778
1354	415	1422	YLR259C	HSP60	>YLR259C HSP60 SGDID:S000004249, Chr XII from 665004-663286, reverse complement, Verified ORF, Tetradecameric mitochondrial chaperonin required for ATP-dependent folding of precursor polypeptides and complex assembly; prevents aggregation and mediates pro	1	125.839	0.00218666	125.84	No known flanking GlyGly site, ratio may be meaningful	1.53692			1.53692
1943	54	2067	YPL240C	HSP82	>YPL240C HSP82 SGDID:S000006161, Chr XVI from 98625-96496, reverse complement, Verified ORF, Hsp90 chaperone required for pheromone signaling and negative regulation of Hsf1p; docks with Tom70p for mitochondrial preprotein delivery; promotes telomerase DN	1	71.5287	0.0258384	71.529	No known flanking GlyGly site, ratio may be meaningful	1.46129			1.46129
1746	361	1870	YOR025W	HST3	>YOR025W HST3 SGDID:S000005551, Chr XV from 378219-379562, Verified ORF, Member of the Sir2 family of NAD(+)-dependent protein deacetylases; involved along with Hst4p in telomeric silencing, cell cycle progression, radiation resistance, genomic stability	1	75.5657	0.00232046	96.113	No flanking Lys, ratio valid
95	22;22	100;473	YBL003C;YDR225W	HTA2	>YBL003C HTA2 SGDID:S000000099, Chr II from 235795-235397, reverse complement, Verified ORF, One of two nearly identical (see also HTA1) histone H2A subtypes; core histone required for chromatin assembly and chromosome function; DNA damage-dependent phosp	1	61.4227	0.000267482	163.38	No flanking Lys, ratio valid	0.630184	1.18597	0.563674	0.749646	0.743649	0.552287	0.640865
91	124;124	99;472	YBL002W;YDR224C	HTB2	>YBL002W HTB2 SGDID:S000000098, Chr II from 236495-236890, Verified ORF, One of two nearly identical (see HTB1) histone H2B subtypes required for chromatin assembly and chromosome function; Rad6p-Bre1p-Lge1p mediated ubiquitination regulates transcription	1	132.517	3.45283e-24	296.27	No flanking Lys, ratio valid	0.966324	0.9858	0.829566	0.924529	0.86317	0.814333	0.838396
92	47;47	99;472	YBL002W;YDR224C	HTB2	>YBL002W HTB2 SGDID:S000000098, Chr II from 236495-236890, Verified ORF, One of two nearly identical (see HTB1) histone H2B subtypes required for chromatin assembly and chromosome function; Rad6p-Bre1p-Lge1p mediated ubiquitination regulates transcription	1	117.022	0.000328586	145.81	Known Flanking GlyGly site, ratio meaningless
93	50;50	99;472	YBL002W;YDR224C	HTB2	>YBL002W HTB2 SGDID:S000000098, Chr II from 236495-236890, Verified ORF, One of two nearly identical (see HTB1) histone H2B subtypes required for chromatin assembly and chromosome function; Rad6p-Bre1p-Lge1p mediated ubiquitination regulates transcription	1	187.625	5.01498e-06	240.65	Known Flanking GlyGly site, ratio meaningless
94	112;112	99;472	YBL002W;YDR224C	HTB2	>YBL002W HTB2 SGDID:S000000098, Chr II from 236495-236890, Verified ORF, One of two nearly identical (see HTB1) histone H2B subtypes required for chromatin assembly and chromosome function; Rad6p-Bre1p-Lge1p mediated ubiquitination regulates transcription	1	226.795	0.00026768	226.79	No flanking Lys, ratio valid	0.74998	0.719831	0.815879	0.760855
938	3	917	YGR268C	HUA1	>YGR268C HUA1 SGDID:S000003500, Chr VII from 1026659-1026063, reverse complement, Verified ORF, Cytoplasmic protein containing a zinc finger domain with sequence similarity to that of Type I J-proteins; computational analysis of large-scale protein-protei	0.999999	58.2334	2.30023e-05	134.09	No known flanking GlyGly site, ratio may be meaningful
1454	26	1550	YMR011W	HXT2	>YMR011W HXT2 SGDID:S000004613, Chr XIII from 288078-289703, Verified ORF, High-affinity glucose transporter of the major facilitator superfamily, expression is induced by low levels of glucose and repressed by high levels of glucose	1	45.8031	0.000200338	82.042	No known flanking GlyGly site, ratio may be meaningful
600	86	586	YEL034W	HYP2	>YEL034W HYP2 SGDID:S000000760, Chr V from 85676-86149, Verified ORF, Translation initiation factor eIF-5A, promotes formation of the first peptide bond; similar to and functionally redundant with Anb1p; possible role in translation elongation; undergoes	0.999743	35.9076	0.00317157	55.899	No known flanking GlyGly site, ratio may be meaningful	0.658798			0.658798
601	35	586	YEL034W	HYP2	>YEL034W HYP2 SGDID:S000000760, Chr V from 85676-86149, Verified ORF, Translation initiation factor eIF-5A, promotes formation of the first peptide bond; similar to and functionally redundant with Anb1p; possible role in translation elongation; undergoes	1	76.2215	0.0591531	76.221	No known flanking GlyGly site, ratio may be meaningful			0.848354	0.848354
602	40	586	YEL034W	HYP2	>YEL034W HYP2 SGDID:S000000760, Chr V from 85676-86149, Verified ORF, Translation initiation factor eIF-5A, promotes formation of the first peptide bond; similar to and functionally redundant with Anb1p; possible role in translation elongation; undergoes	1	119.213	0.000122004	175.29	No known flanking GlyGly site, ratio may be meaningful	0.973361	0.853184	0.975927	0.932348
1060	6	1087	YIR037W	HYR1	>YIR037W HYR1 SGDID:S000001476, Chr IX from 423125-423616, Verified ORF, Thiol peroxidase that functions as a hydroperoxide receptor to sense intracellular hydroperoxide levels and transduce a redox signal to the Yap1p transcription factor	0.99999	49.8858	0.00146786	80.455	No known flanking GlyGly site, ratio may be meaningful	0.298865	0.475788	0.429877	0.393923
1061	114	1087	YIR037W	HYR1	>YIR037W HYR1 SGDID:S000001476, Chr IX from 423125-423616, Verified ORF, Thiol peroxidase that functions as a hydroperoxide receptor to sense intracellular hydroperoxide levels and transduce a redox signal to the Yap1p transcription factor	1	107.966	0.00477916	107.97	No known flanking GlyGly site, ratio may be meaningful	0.262703			0.262703
1570	334	1686	YNL037C	IDH1	>YNL037C IDH1 SGDID:S000004982, Chr XIV from 559003-557921, reverse complement, Verified ORF, Subunit of mitochondrial NAD(+)-dependent isocitrate dehydrogenase, which catalyzes the oxidation of isocitrate to alpha-ketoglutarate in the TCA cycle	1	152.061	0.000128168	155.66	No known flanking GlyGly site, ratio may be meaningful	0.553432	0.450759	0.66395	0.54918
1902	252	2025	YPL117C	IDI1	>YPL117C IDI1 SGDID:S000006038, Chr XVI from 328729-327863, reverse complement, Verified ORF, Isopentenyl diphosphate:dimethylallyl diphosphate isomerase (IPP isomerase), catalyzes an essential activation step in the isoprenoid biosynthetic pathway; requi	1	154.85	0.000369647	154.85	Known Flanking GlyGly site, ratio meaningless
1903	243	2025	YPL117C	IDI1	>YPL117C IDI1 SGDID:S000006038, Chr XVI from 328729-327863, reverse complement, Verified ORF, Isopentenyl diphosphate:dimethylallyl diphosphate isomerase (IPP isomerase), catalyzes an essential activation step in the isoprenoid biosynthetic pathway; requi	1	122.691	0.000275029	122.69	Known Flanking GlyGly site, ratio meaningless
606	126	591	YEL044W	IES6	>YEL044W IES6 SGDID:S000000770, Chr V from 69757-70257, Verified ORF, Protein that associates with the INO80 chromatin remodeling complex under low-salt conditions	1	95.7414	0.00220029	95.741	No known flanking GlyGly site, ratio may be meaningful
647	7	647	YER086W	ILV1	>YER086W ILV1 SGDID:S000000888, Chr V from 328473-330203, Verified ORF, Threonine deaminase, catalyzes the first step in isoleucine biosynthesis; expression is under general amino acid control; ILV1 locus exhibits highly positioned nucleosomes whose organ	1	56.4044	0.0542666	56.404	No flanking Lys, ratio valid
1016	8	1023	YHR216W	IMD2	>YHR216W IMD2 SGDID:S000001259, Chr VIII from 554396-555967, Verified ORF, Inosine monophosphate dehydrogenase, catalyzes the first step of GMP biosynthesis, expression is induced by mycophenolic acid resulting in resistance to the drug, expression is rep	1	204.625	1.4213e-07	238.88	Known Flanking GlyGly site, ratio meaningless
1017	15	1023	YHR216W	IMD2	>YHR216W IMD2 SGDID:S000001259, Chr VIII from 554396-555967, Verified ORF, Inosine monophosphate dehydrogenase, catalyzes the first step of GMP biosynthesis, expression is induced by mycophenolic acid resulting in resistance to the drug, expression is rep	1	90.476	9.97931e-05	168.98	Known Flanking GlyGly site, ratio meaningless
1018	426;426	1023;1480	YHR216W;YLR432W	IMD2	>YHR216W IMD2 SGDID:S000001259, Chr VIII from 554396-555967, Verified ORF, Inosine monophosphate dehydrogenase, catalyzes the first step of GMP biosynthesis, expression is induced by mycophenolic acid resulting in resistance to the drug, expression is rep	1	318.637	1.51635e-20	318.64	No known flanking GlyGly site, ratio may be meaningful	0.852159			0.852159
1019	241	1023	YHR216W	IMD2	>YHR216W IMD2 SGDID:S000001259, Chr VIII from 554396-555967, Verified ORF, Inosine monophosphate dehydrogenase, catalyzes the first step of GMP biosynthesis, expression is induced by mycophenolic acid resulting in resistance to the drug, expression is rep	1	228.606	4.45321e-05	228.61	Known Flanking GlyGly site, ratio meaningless
1020	488	1023	YHR216W	IMD2	>YHR216W IMD2 SGDID:S000001259, Chr VIII from 554396-555967, Verified ORF, Inosine monophosphate dehydrogenase, catalyzes the first step of GMP biosynthesis, expression is induced by mycophenolic acid resulting in resistance to the drug, expression is rep	1	135.987	0.00229393	135.99	No flanking Lys, ratio valid
1021	519;519;520	1023;1480;1509	YHR216W;YLR432W;YML056C	IMD2	>YHR216W IMD2 SGDID:S000001259, Chr VIII from 554396-555967, Verified ORF, Inosine monophosphate dehydrogenase, catalyzes the first step of GMP biosynthesis, expression is induced by mycophenolic acid resulting in resistance to the drug, expression is rep	1	59.2273	0.00448448	104.16	No flanking Lys, ratio valid	1.27877		1.03706	1.15159
1022	232;232	1023;1480	YHR216W;YLR432W	IMD2	>YHR216W IMD2 SGDID:S000001259, Chr VIII from 554396-555967, Verified ORF, Inosine monophosphate dehydrogenase, catalyzes the first step of GMP biosynthesis, expression is induced by mycophenolic acid resulting in resistance to the drug, expression is rep	1	169.087	6.49419e-08	215.96	Known Flanking GlyGly site, ratio meaningless
1023	115;115	1023;1480	YHR216W;YLR432W	IMD2	>YHR216W IMD2 SGDID:S000001259, Chr VIII from 554396-555967, Verified ORF, Inosine monophosphate dehydrogenase, catalyzes the first step of GMP biosynthesis, expression is induced by mycophenolic acid resulting in resistance to the drug, expression is rep	1	190.328	2.24267e-14	190.33	No known flanking GlyGly site, ratio may be meaningful	0.755414			0.755414
1024	156	1023	YHR216W	IMD2	>YHR216W IMD2 SGDID:S000001259, Chr VIII from 554396-555967, Verified ORF, Inosine monophosphate dehydrogenase, catalyzes the first step of GMP biosynthesis, expression is induced by mycophenolic acid resulting in resistance to the drug, expression is rep	1	177.305	9.85892e-05	177.3	No known flanking GlyGly site, ratio may be meaningful	0.489788	0.530289	0.961105	0.629647
1396	156	1480	YLR432W	IMD3	>YLR432W IMD3 SGDID:S000004424, Chr XII from 1002554-1004125, Verified ORF, Inosine monophosphate dehydrogenase, catalyzes the first step of GMP biosynthesis, member of a four-gene family in S. cerevisiae, constitutively expressed	1	166.791	0.000552997	186.29	No flanking Lys, ratio valid	3.12729	1.22602	1.48587	1.78601
1397	32	1480	YLR432W	IMD3	>YLR432W IMD3 SGDID:S000004424, Chr XII from 1002554-1004125, Verified ORF, Inosine monophosphate dehydrogenase, catalyzes the first step of GMP biosynthesis, member of a four-gene family in S. cerevisiae, constitutively expressed	1	155.144	0.000232944	155.14	No flanking Lys, ratio valid	0.687993			0.687993
1398	488	1480	YLR432W	IMD3	>YLR432W IMD3 SGDID:S000004424, Chr XII from 1002554-1004125, Verified ORF, Inosine monophosphate dehydrogenase, catalyzes the first step of GMP biosynthesis, member of a four-gene family in S. cerevisiae, constitutively expressed	1	215.722	1.46366e-06	234.82	No known flanking GlyGly site, ratio may be meaningful	0.79944			0.79944
1399	15	1480	YLR432W	IMD3	>YLR432W IMD3 SGDID:S000004424, Chr XII from 1002554-1004125, Verified ORF, Inosine monophosphate dehydrogenase, catalyzes the first step of GMP biosynthesis, member of a four-gene family in S. cerevisiae, constitutively expressed	1	125.713	0.000874742	125.71	No known flanking GlyGly site, ratio may be meaningful	0.79717			0.79717
1056	200	1076	YIL154C	IMP2'	>YIL154C IMP2' SGDID:S000001416, Chr IX from 55021-53981, reverse complement, Verified ORF, Transcriptional activator involved in maintenance of ion homeostasis and protection against DNA damage caused by bleomycin and other oxidants, contains a C-termina	1	265.312	6.23821e-05	265.31	No flanking Lys, ratio valid
1580	28	1703	YNL075W	IMP4	>YNL075W IMP4 SGDID:S000005019, Chr XIV from 485608-486480, Verified ORF, Component of the SSU processome, which is required for pre-18S rRNA processing; interacts with Mpp10p; member of a superfamily of proteins that contain a sigma(70)-like motif and as	1	137.98	4.13331e-07	248.96	No known flanking GlyGly site, ratio may be meaningful
979	37	962	YHR046C	INM1	>YHR046C INM1 SGDID:S000001088, Chr VIII from 198278-197391, reverse complement, Verified ORF, Inositol monophosphatase, involved in biosynthesis of inositol and in phosphoinositide second messenger signaling; INM1 expression increases in the presence of	0.99813	27.2732	0.00879402	85.533	No known flanking GlyGly site, ratio may be meaningful			0.0214468	0.0214468
1693	3	1831	YOL065C	INP54	>YOL065C INP54 SGDID:S000005426, Chr XV from 205885-204731, reverse complement, Verified ORF, Phosphatidylinositol 4,5-bisphosphate 5-phosphatase with a role in secretion, localizes to the endoplasmic reticulum via the C-terminal tail; lacks the Sac1 doma	1	58.9172	0.0122449	58.917	No known flanking GlyGly site, ratio may be meaningful
1634	492	1743	YNL182C	IPI3	>YNL182C IPI3 SGDID:S000005126, Chr XIV from 297629-295962, reverse complement, Verified ORF, Essential component of the Rix1 complex (Rix1p, Ipi1p, Ipi3p) that is required for processing of ITS2 sequences from 35S pre-rRNA; highly conserved and contains	1	191.632	0.00044048	244.23	No known flanking GlyGly site, ratio may be meaningful	0.776355			0.776355
137	62	144	YBR011C	IPP1	>YBR011C IPP1 SGDID:S000000215, Chr II from 257973-257110, reverse complement, Verified ORF, Cytoplasmic inorganic pyrophosphatase (PPase), catalyzes the rapid exchange of oxygens from Pi with water, highly expressed and essential for viability, active-si	1	124.068	0.00157694	124.07	Known Flanking GlyGly site, ratio meaningless
138	74	144	YBR011C	IPP1	>YBR011C IPP1 SGDID:S000000215, Chr II from 257973-257110, reverse complement, Verified ORF, Cytoplasmic inorganic pyrophosphatase (PPase), catalyzes the rapid exchange of oxygens from Pi with water, highly expressed and essential for viability, active-si	1	103.479	0.000933458	162.26	Known Flanking GlyGly site, ratio meaningless
139	11	144	YBR011C	IPP1	>YBR011C IPP1 SGDID:S000000215, Chr II from 257973-257110, reverse complement, Verified ORF, Cytoplasmic inorganic pyrophosphatase (PPase), catalyzes the rapid exchange of oxygens from Pi with water, highly expressed and essential for viability, active-si	1	94.4091	0.00391644	94.409	No known flanking GlyGly site, ratio may be meaningful	1.03251			1.03251
140	239	144	YBR011C	IPP1	>YBR011C IPP1 SGDID:S000000215, Chr II from 257973-257110, reverse complement, Verified ORF, Cytoplasmic inorganic pyrophosphatase (PPase), catalyzes the rapid exchange of oxygens from Pi with water, highly expressed and essential for viability, active-si	1	201.847	0.000514663	201.85	No known flanking GlyGly site, ratio may be meaningful	0.826851	0.690701	0.834374	0.781075
208	1053	192	YBR140C	IRA1	>YBR140C IRA1 SGDID:S000000344, Chr II from 526622-517344, reverse complement, Verified ORF, GTPase-activating protein that negatively regulates RAS by converting it from the GTP- to the GDP-bound inactive form, required for reducing cAMP levels under nut	0.962716	17.1051	0.0393328	64.711	No known flanking GlyGly site, ratio may be meaningful
209	396	192	YBR140C	IRA1	>YBR140C IRA1 SGDID:S000000344, Chr II from 526622-517344, reverse complement, Verified ORF, GTPase-activating protein that negatively regulates RAS by converting it from the GTP- to the GDP-bound inactive form, required for reducing cAMP levels under nut	1	79.3174	0.00607964	79.317	No known flanking GlyGly site, ratio may be meaningful
172	707	172	YBR086C	IST2	>YBR086C IST2 SGDID:S000000290, Chr II from 423035-420195, reverse complement, Verified ORF, Plasma membrane protein that may be involved in osmotolerance, localizes to the mother cell in small-budded cells and to the bud in medium- and large-budded cells	0.915038	10.3221	0.00115596	71.418	No known flanking GlyGly site, ratio may be meaningful	1.81029			1.81029
173	762	172	YBR086C	IST2	>YBR086C IST2 SGDID:S000000290, Chr II from 423035-420195, reverse complement, Verified ORF, Plasma membrane protein that may be involved in osmotolerance, localizes to the mother cell in small-budded cells and to the bud in medium- and large-budded cells	1	88.2244	0.000283425	447.97	No known flanking GlyGly site, ratio may be meaningful	1.34231			1.34231
174	756	172	YBR086C	IST2	>YBR086C IST2 SGDID:S000000290, Chr II from 423035-420195, reverse complement, Verified ORF, Plasma membrane protein that may be involved in osmotolerance, localizes to the mother cell in small-budded cells and to the bud in medium- and large-budded cells	1	119.274	0.00747775	119.27	No flanking Lys, ratio valid	0.987107			0.987107
576	41	558	YDR497C	ITR1	>YDR497C ITR1 SGDID:S000002905, Chr IV from 1445460-1443706, reverse complement, Verified ORF, Myo-inositol transporter with strong similarity to the minor myo-inositol transporter Itr2p, member of the sugar transporter superfamily; expression is represse	1	97.4306	8.27791e-45	371.33	No flanking Lys, ratio valid	0.785666	0.392342	1.43815	0.762494	0.267943	0.587857	0.396878
577	38	558	YDR497C	ITR1	>YDR497C ITR1 SGDID:S000002905, Chr IV from 1445460-1443706, reverse complement, Verified ORF, Myo-inositol transporter with strong similarity to the minor myo-inositol transporter Itr2p, member of the sugar transporter superfamily; expression is represse	1	187.177	1.30449e-11	229.23	No known flanking GlyGly site, ratio may be meaningful	1.04271	0.627581	1.63217	1.02219	3.12045	0.646248	1.42006
578	573	558	YDR497C	ITR1	>YDR497C ITR1 SGDID:S000002905, Chr IV from 1445460-1443706, reverse complement, Verified ORF, Myo-inositol transporter with strong similarity to the minor myo-inositol transporter Itr2p, member of the sugar transporter superfamily; expression is represse	1	208.381	3.24238e-24	316.54	No flanking Lys, ratio valid	0.5064	0.0839387	0.605411	0.295236	0.465304		0.465304
1707	58	1843	YOL103W	ITR2	>YOL103W ITR2 SGDID:S000005463, Chr XV from 124001-125830, Verified ORF, Myo-inositol transporter with strong similarity to the major myo-inositol transporter Itr1p, member of the sugar transporter superfamily; expressed constitutively	1	125.682	0.0452563	125.68	Known Flanking GlyGly site, ratio meaningless
1708	48	1843	YOL103W	ITR2	>YOL103W ITR2 SGDID:S000005463, Chr XV from 124001-125830, Verified ORF, Myo-inositol transporter with strong similarity to the major myo-inositol transporter Itr1p, member of the sugar transporter superfamily; expressed constitutively	0.999976	46.258	0.02981	79.346	Known Flanking GlyGly site, ratio meaningless
1709	61	1843	YOL103W	ITR2	>YOL103W ITR2 SGDID:S000005463, Chr XV from 124001-125830, Verified ORF, Myo-inositol transporter with strong similarity to the major myo-inositol transporter Itr1p, member of the sugar transporter superfamily; expressed constitutively	1	137.092	6.74582e-05	193.28	Known Flanking GlyGly site, ratio meaningless
1710	72	1843	YOL103W	ITR2	>YOL103W ITR2 SGDID:S000005463, Chr XV from 124001-125830, Verified ORF, Myo-inositol transporter with strong similarity to the major myo-inositol transporter Itr1p, member of the sugar transporter superfamily; expressed constitutively	1	137.092	1.22121e-07	322.23	Known Flanking GlyGly site, ratio meaningless
1711	599	1843	YOL103W	ITR2	>YOL103W ITR2 SGDID:S000005463, Chr XV from 124001-125830, Verified ORF, Myo-inositol transporter with strong similarity to the major myo-inositol transporter Itr1p, member of the sugar transporter superfamily; expressed constitutively	1	99.8441	7.69262e-07	131.17	No known flanking GlyGly site, ratio may be meaningful
1148	118	1204	YJR119C	JHD2	>YJR119C JHD2 SGDID:S000003880, Chr X from 646481-644295, reverse complement, Verified ORF, JmjC domain family histone demethylase specific for H3-K4 (lysine at position 4 of the histone H3 protein); removes methyl groups specifically added by Set1p methy	1	69.7987	0.0141832	82.837	No known flanking GlyGly site, ratio may be meaningful
471	536	444	YDR122W	KIN1	>YDR122W KIN1 SGDID:S000002529, Chr IV from 694698-697892, Verified ORF, Serine/threonine protein kinase involved in regulation of exocytosis; localizes to the cytoplasmic face of the plasma membrane; closely related to Kin2p	1	132.143	0.00104925	132.14	No known flanking GlyGly site, ratio may be meaningful
1299	19	1375	YLR096W	KIN2	>YLR096W KIN2 SGDID:S000004086, Chr XII from 332591-336034, Verified ORF, Serine/threonine protein kinase involved in regulation of exocytosis; localizes to the cytoplasmic face of the plasma membrane; closely related to Kin1p	1	160.934	0.00151737	160.93	No flanking Lys, ratio valid	1.48673			1.48673
1823	308	1945	YOR233W	KIN4	>YOR233W KIN4 SGDID:S000005759, Chr XV from 775847-778249, Verified ORF, Serine/threonine protein kinase that inhibits the mitotic exit network (MEN) when the spindle position checkpoint is activated; localized asymmetrically to mother cell cortex, spindl	1	105.521	0.0142331	105.52	No flanking Lys, ratio valid	7.70306			7.70306
801	125	806	YGL216W	KIP3	>YGL216W KIP3 SGDID:S000003184, Chr VII from 84884-87301, Verified ORF, Kinesin-related motor protein involved in mitotic spindle positioning	1	92.1898	0.00666537	92.19	No known flanking GlyGly site, ratio may be meaningful
575	7	554	YDR483W	KRE2	>YDR483W KRE2 SGDID:S000002891, Chr IV from 1421150-1422478, Verified ORF, Alpha1,2-mannosyltransferase of the Golgi involved in protein mannosylation	1	77.9438	0.0814156	77.944	No flanking Lys, ratio valid	0.854495	0.955629		0.903648
1994	104	2128	YPR159W	KRE6	>YPR159W KRE6 SGDID:S000006363, Chr XVI from 857579-859741, Verified ORF, Protein required for beta-1,6 glucan biosynthesis; putative beta-glucan synthase; appears functionally redundant with Skn1p	1	101.38	2.7867e-21	247.75	Known Flanking GlyGly site, ratio meaningless
1995	98	2128	YPR159W	KRE6	>YPR159W KRE6 SGDID:S000006363, Chr XVI from 857579-859741, Verified ORF, Protein required for beta-1,6 glucan biosynthesis; putative beta-glucan synthase; appears functionally redundant with Skn1p	1	103.546	0.000479474	127.2	Known Flanking GlyGly site, ratio meaningless
1996	316	2128	YPR159W	KRE6	>YPR159W KRE6 SGDID:S000006363, Chr XVI from 857579-859741, Verified ORF, Protein required for beta-1,6 glucan biosynthesis; putative beta-glucan synthase; appears functionally redundant with Skn1p	1	85.9764	0.00457259	137.27	No flanking Lys, ratio valid	0.464449			0.464449
440	241	415	YDR037W	KRS1	>YDR037W KRS1 SGDID:S000002444, Chr IV from 525438-527213, Verified ORF, Lysyl-tRNA synthetase; also identified as a negative regulator of general control of amino acid biosynthesis	1	91.9612	0.000965249	95.477	No flanking Lys, ratio valid	2.01051	1.69281		1.84483
1786	3	1894	YOR099W	KTR1	>YOR099W KTR1 SGDID:S000005625, Chr XV from 511826-513007, Verified ORF, Alpha-1,2-mannosyltransferase involved in O- and N-linked protein glycosylation; type II membrane protein; member of the KRE2/MNT1 mannosyltransferase family	1	62.6585	0.00473367	85.355	No known flanking GlyGly site, ratio may be meaningful
1680	16	1814	YOL025W	LAG2	>YOL025W LAG2 SGDID:S000005385, Chr XV from 274958-276940, Verified ORF, Protein involved in determination of longevity; LAG2 gene is preferentially expressed in young cells; overexpression extends the mean and maximum life span of cells	0.999594	33.9155	1.4093e-10	207.95	No known flanking GlyGly site, ratio may be meaningful
1191	488	1254	YKL103C	LAP4	>YKL103C LAP4 SGDID:S000001586, Chr XI from 247326-245782, reverse complement, Verified ORF, Vacuolar aminopeptidase, often used as a marker protein in studies of autophagy and cytosol to vacuole targeting (CVT) pathway	1	169.993	1.94743e-06	169.99	No known flanking GlyGly site, ratio may be meaningful
1192	350	1254	YKL103C	LAP4	>YKL103C LAP4 SGDID:S000001586, Chr XI from 247326-245782, reverse complement, Verified ORF, Vacuolar aminopeptidase, often used as a marker protein in studies of autophagy and cytosol to vacuole targeting (CVT) pathway	1	64.8424	0.0540242	64.842	No flanking Lys, ratio valid	1.51923			1.51923
1811	143	1922	YOR171C	LCB4	>YOR171C LCB4 SGDID:S000005697, Chr XV from 653885-652011, reverse complement, Verified ORF, Sphingoid long-chain base kinase, responsible for synthesis of long-chain base phosphates, which function as signaling molecules, regulates synthesis of ceramide	1	105.415	0.00196926	203.57	No known flanking GlyGly site, ratio may be meaningful
1812	437	1922	YOR171C	LCB4	>YOR171C LCB4 SGDID:S000005697, Chr XV from 653885-652011, reverse complement, Verified ORF, Sphingoid long-chain base kinase, responsible for synthesis of long-chain base phosphates, which function as signaling molecules, regulates synthesis of ceramide	0.991653	20.7485	0.00624441	118.9	Known Flanking GlyGly site, ratio meaningless
1813	439	1922	YOR171C	LCB4	>YOR171C LCB4 SGDID:S000005697, Chr XV from 653885-652011, reverse complement, Verified ORF, Sphingoid long-chain base kinase, responsible for synthesis of long-chain base phosphates, which function as signaling molecules, regulates synthesis of ceramide	0.973891	15.7173	0.036944	55.112	Known Flanking GlyGly site, ratio meaningless
1814	90	1922	YOR171C	LCB4	>YOR171C LCB4 SGDID:S000005697, Chr XV from 653885-652011, reverse complement, Verified ORF, Sphingoid long-chain base kinase, responsible for synthesis of long-chain base phosphates, which function as signaling molecules, regulates synthesis of ceramide	1	86.6992	9.67985e-07	293.76	No known flanking GlyGly site, ratio may be meaningful		1.481	1.16238	1.31205
1840	486	1974	YOR322C	LDB19	>YOR322C LDB19 SGDID:S000005849, Chr XV from 921059-918603, reverse complement, Verified ORF, Protein of unknown function involved in maintenance of proper telomere length; null mutant shows a reduced affinity for the alcian blue dye suggesting a decrease	1	257.09	0.000307449	257.09	No known flanking GlyGly site, ratio may be meaningful		0.90208		0.90208
749	774	740	YGL009C	LEU1	>YGL009C LEU1 SGDID:S000002977, Chr VII from 478657-476318, reverse complement, Verified ORF, Isopropylmalate isomerase, catalyzes the second step in the leucine biosynthesis pathway	1	102.067	1.29952e-07	193.41	No known flanking GlyGly site, ratio may be meaningful	1.28109	0.910521		1.08003
750	97	740	YGL009C	LEU1	>YGL009C LEU1 SGDID:S000002977, Chr VII from 478657-476318, reverse complement, Verified ORF, Isopropylmalate isomerase, catalyzes the second step in the leucine biosynthesis pathway	1	187.546	5.67582e-10	187.55	Known Flanking GlyGly site, ratio meaningless
751	104	740	YGL009C	LEU1	>YGL009C LEU1 SGDID:S000002977, Chr VII from 478657-476318, reverse complement, Verified ORF, Isopropylmalate isomerase, catalyzes the second step in the leucine biosynthesis pathway	1	106.785	0.00131025	106.79	Known Flanking GlyGly site, ratio meaningless
752	88	740	YGL009C	LEU1	>YGL009C LEU1 SGDID:S000002977, Chr VII from 478657-476318, reverse complement, Verified ORF, Isopropylmalate isomerase, catalyzes the second step in the leucine biosynthesis pathway	1	136.53	0.000305804	136.53	No known flanking GlyGly site, ratio may be meaningful	1.60045		2.59215	2.03681
335	153	321	YDL051W	LHP1	>YDL051W LHP1 SGDID:S000002209, Chr IV from 363952-364779, Verified ORF, RNA binding protein required for maturation of tRNA and snRNA precursors; acts as a molecular chaperone for RNAs transcribed by polymerase III; homologous to human La (SS-B) autoanti	1	82.305	0.0351655	82.305	No known flanking GlyGly site, ratio may be meaningful	0.193084			0.193084
336	4	321	YDL051W	LHP1	>YDL051W LHP1 SGDID:S000002209, Chr IV from 363952-364779, Verified ORF, RNA binding protein required for maturation of tRNA and snRNA precursors; acts as a molecular chaperone for RNAs transcribed by polymerase III; homologous to human La (SS-B) autoanti	1	95.4774	9.32757e-05	154.85	No known flanking GlyGly site, ratio may be meaningful	1.12612	1.39169	1.44961	1.3146
1137	31	1187	YJR070C	LIA1	>YJR070C LIA1 SGDID:S000003831, Chr X from 570591-569614, reverse complement, Verified ORF, Deoxyhypusine hydroxylase, a HEAT-repeat containing metalloenzyme that catalyses hypusine formation; binds to and is required for the modification of Hyp2p (eIF5A)	1	75.509	0.00914095	91.658	No known flanking GlyGly site, ratio may be meaningful		0.623844	1.12104	0.836274
861	41	863	YGR136W	LSB1	>YGR136W LSB1 SGDID:S000003368, Chr VII from 762433-763158, Verified ORF, Protein containing an N-terminal SH3 domain; binds Las17p, which is a homolog of human Wiskott-Aldrich Syndrome protein involved in actin patch assembly and actin polymerization	1	190.26	2.66824e-22	240.37	No known flanking GlyGly site, ratio may be meaningful	1.07636			1.07636		1.04435	1.04435
862	79	863	YGR136W	LSB1	>YGR136W LSB1 SGDID:S000003368, Chr VII from 762433-763158, Verified ORF, Protein containing an N-terminal SH3 domain; binds Las17p, which is a homolog of human Wiskott-Aldrich Syndrome protein involved in actin patch assembly and actin polymerization	1	84.9155	9.70035e-11	235.12	No known flanking GlyGly site, ratio may be meaningful	1.0666			1.0666		0.785123	0.785123
729	363	724	YFR024C-A	LSB3	>YFR024C-A LSB3 SGDID:S000002968, Chr VI from 203421-203375,203280-201948, reverse complement, Verified ORF, Protein containing a C-terminal SH3 domain; binds Las17p, which is a homolog of human Wiskott-Aldrich Syndrome protein involved in actin patch ass	1	254.338	5.55755e-05	277.1	No flanking Lys, ratio valid	1.62744		1.61148	1.61944
279	115	257	YCL034W	LSB5	>YCL034W LSB5 SGDID:S000000539, Chr III from 61658-62722, Verified ORF, Protein of unknown function; binds Las17p, which is a homolog of human Wiskott-Aldrich Syndrome protein involved in actin patch assembly and actin polymerization	1	270.952	0.000175928	270.95	No flanking Lys, ratio valid
1089	133	1127	YJL124C	LSM1	>YJL124C LSM1 SGDID:S000003660, Chr X from 187643-187125, reverse complement, Verified ORF, Lsm (Like Sm) protein; forms heteroheptameric complex (with Lsm2p, Lsm3p, Lsm4p, Lsm5p, Lsm6p, and Lsm7p) involved in degradation of cytoplasmic mRNAs	1	96.1904	0.0021541	96.19	No known flanking GlyGly site, ratio may be meaningful
1868	29	1993	YPL004C	LSP1	>YPL004C LSP1 SGDID:S000005925, Chr XVI from 551654-550629, reverse complement, Verified ORF, Primary component of eisosomes, which are large immobile patch structures at the cell cortex associated with endocytosis, along with Pil1p and Sur7p; null mutant	1	60.345	0.000640159	172.93	No known flanking GlyGly site, ratio may be meaningful	0.921475	0.926082	1.10743	0.981332
1969	67	2101	YPR073C	LTP1	>YPR073C LTP1 SGDID:S000006277, Chr XVI from 692415-691930, reverse complement, Verified ORF, Protein phosphotyrosine phosphatase of unknown cellular role; activated by adenine	1	84.8173	0.000807788	113.07	No known flanking GlyGly site, ratio may be meaningful
1652	60	1771	YNL268W	LYP1	>YNL268W LYP1 SGDID:S000005212, Chr XIV from 138551-140386, Verified ORF, Lysine permease; one of three amino acid permeases (Alp1p, Can1p, Lyp1p) responsible for uptake of cationic amino acids	0.5	0	0.00898924	45.237	Known Flanking GlyGly site, ratio meaningless
1653	61	1771	YNL268W	LYP1	>YNL268W LYP1 SGDID:S000005212, Chr XIV from 138551-140386, Verified ORF, Lysine permease; one of three amino acid permeases (Alp1p, Can1p, Lyp1p) responsible for uptake of cationic amino acids	0.5	0	0.00898924	45.237	Known Flanking GlyGly site, ratio meaningless
1654	54	1771	YNL268W	LYP1	>YNL268W LYP1 SGDID:S000005212, Chr XIV from 138551-140386, Verified ORF, Lysine permease; one of three amino acid permeases (Alp1p, Can1p, Lyp1p) responsible for uptake of cationic amino acids	1	118.766	4.13808e-20	335.1	No known flanking GlyGly site, ratio may be meaningful
1059	13	1084	YIR034C	LYS1	>YIR034C LYS1 SGDID:S000001473, Chr IX from 420733-419612, reverse complement, Verified ORF, Saccharopine dehydrogenase (NAD+, L-lysine-forming), catalyzes the conversion of saccharopine to L-lysine, which is the final step in the lysine biosynthesis path	1	105.195	0.00314162	127.51	No flanking Lys, ratio valid	0.740325	2.01636	1.12929	1.19014
369	141	355	YDL131W	LYS21	>YDL131W LYS21 SGDID:S000002289, Chr IV from 227393-228715, Verified ORF, Homocitrate synthase isozyme, catalyzes the condensation of acetyl-CoA and alpha-ketoglutarate to form homocitrate, which is the first step in the lysine biosynthesis pathway; highl	1	123.758	0.000803018	123.76	No known flanking GlyGly site, ratio may be meaningful	0.430941			0.430941
678	223	673	YER142C	MAG1	>YER142C MAG1 SGDID:S000000944, Chr V from 456031-455141, reverse complement, Verified ORF, 3-methyl-adenine DNA glycosylase involved in protecting DNA against alkylating agents; initiates base excision repair by removing damaged bases to create abasic si	0.999566	33.6241	0.00462849	95.981	No known flanking GlyGly site, ratio may be meaningful
1392	30	1478	YLR427W	MAG2	>YLR427W MAG2 SGDID:S000004419, Chr XII from 988425-990437, Verified ORF, Cytoplasmic protein of unknown function predicted to encode a DNA-3-methyladenine glycosidase II that catalyzes the hydrolysis of alkylated DNA	0.999945	42.6277	1.6522e-08	102.36	Known Flanking GlyGly site, ratio meaningless
1393	650	1478	YLR427W	MAG2	>YLR427W MAG2 SGDID:S000004419, Chr XII from 988425-990437, Verified ORF, Cytoplasmic protein of unknown function predicted to encode a DNA-3-methyladenine glycosidase II that catalyzes the hydrolysis of alkylated DNA	1	115.793	2.67694e-05	161.31	No flanking Lys, ratio valid
[truncated: 1,281 more rows]

## Sheet: Supplementary file 3B_NonRibo
GG_Peptide id #	Positions within proteins	Protein group IDs	Leading proteins	Leading Gene Name	Fasta headers	Localization prob	Score diff	PEP	Score	Site Score	Least Changed Ratio (tom1D_Bio1)	Least Changed Ratio (tom1D_Bio2)	Least Changed Ratio (tom1D_Bio3)	Geometric Mean of Least Changed Ratios (tom1D/WT)	Least Changed Ratio tom1 (C:A) Mt_Bio1	Least Changed Ratio tom1 (C:A) Mt_Bio2	Geometric Mean of Least Changed Ratio (tom1 (C:A) Mt/WT)
[truncated: 1,738 more rows]

[truncated: 3 more sheets: Supplementary file 3B_RPL, Supplementary file 3B_RPS, Supplementary file 3C]
